# Supplementary material for: Electricity-driven redox-neutral C(sp3)–H amidation withN-alkoxyamide as an amidating reagent
Source: Royal Society of Chemistry journal article supplement (doi:10.1039/d2qo01108e), 2022-01-01

# Electricity-Driven Redox-Neutral C(sp<sup>3</sup>)-H Amidation with *N*-alkoxyamide as Amidating Reagent

Fengyi Li, Yating Liang, Xuan Zhan, Sheng Zhang,\* and Man-Bo Li\*

Institute of Physical Science and Information Technology, Anhui University, Hefei, Anhui 230601, P.  
R. China.

Email: shengzhang@ahu.edu.cn; mbli@ahu.edu.cn;

## Supporting Information

Table of Contents

|                                                                        |         |
|------------------------------------------------------------------------|---------|
| <b>Part I Experimental Section</b>                                     | S2      |
| 1. General information                                                 | S2      |
| 2. Optimization of reaction conditions                                 | S2-S3   |
| 3. General procedure for the electrochemical amidation                 | S4-S5   |
| 4. Procedure for gram scale reaction and the reaction using solar cell | S5-S6   |
| 5. Control experiments                                                 | S6-S10  |
| 6. Cyclic voltammetric experiments                                     | S11-S13 |
| 7. Experimental data for products                                      | S14-S25 |
| 8. References                                                          | S26     |
| <b>NMR spectra</b>                                                     | S27-S62 |

## 1. General Information

$^1\text{H}$  NMR and  $^{13}\text{C}$  NMR were recorded on a Bruker 400 MHz spectrometer ( $^1\text{H}$  NMR: 400MHz,  $^{13}\text{C}$  NMR: 100MHz). The chemical shifts ( $\delta$ ) and coupling constants ( $J$ ) were expressed in ppm and Hz respectively.  $^1\text{H}$  NMR spectra were referenced to the solvent residual peak (TMS,  $\delta$  0 ppm) and  $^{13}\text{C}\{^1\text{H}\}$  NMR spectra were referenced to the solvent residual peak ( $\text{CDCl}_3$ ,  $\delta$  77.0 ppm,  $\text{DMSO-d}_6$ ,  $\delta$  39.5 ppm). High Resolution mass spectra were obtained using ThermoFisher LTQ Orbitrap XL mass spectrometer. All solvents were purified and dried according to the standard procedures unless otherwise noted. Commercially substrates were purchased and used directly. *N*-alkoxyamides<sup>1,2</sup>, xanthenes<sup>3</sup>, 9*H*-thioxanthene<sup>4</sup> and 5*H*-dibenzo[*a,d*][7]annulene<sup>5</sup> were prepared according to the literature procedures.

## 2. Optimization of reaction conditions

**Table S1.** Optimization of redox-neutral C(sp<sup>3</sup>)-H amidation <sup>a</sup>

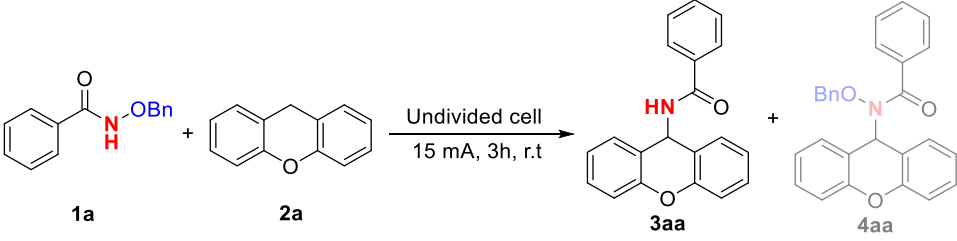

| Entry | Electrolyte                                    | Electrodes         | Solvent        | Yield of <b>3aa/4aa</b> (%) <sup>b</sup> |
|-------|------------------------------------------------|--------------------|----------------|------------------------------------------|
| 1     | <sup>n</sup> Bu <sub>4</sub> NClO <sub>4</sub> | Pt(+)-C(-)         | MeCN           | 81/9                                     |
| 2     | <sup>n</sup> Bu <sub>4</sub> NClO <sub>4</sub> | Pt(+)-C(-)         | MeCN/DCM(1/2)  | 48/11                                    |
| 3     | <sup>n</sup> Bu <sub>4</sub> NClO <sub>4</sub> | Pt(+)-C(-)         | MeCN/MeOH(1/2) | 18/23                                    |
| 4     | <sup>n</sup> Bu <sub>4</sub> NClO <sub>4</sub> | Pt(+)-C(-)         | MeCN/THF(1/2)  | 91/trace                                 |
| 5     | <sup>n</sup> Bu <sub>4</sub> NBF <sub>4</sub>  | Pt(+)-C(-)         | MeCN/THF(1/2)  | 54/23                                    |
| 6     | <sup>n</sup> Bu <sub>4</sub> NOAc              | Pt(+)-C(-)         | MeCN/THF(1/2)  | trace/trace                              |
| 7     | <sup>n</sup> Bu <sub>4</sub> NBr               | Pt(+)-C(-)         | MeCN/THF(1/2)  | trace/47                                 |
| 8     | <sup>n</sup> Bu <sub>4</sub> NClO <sub>4</sub> | C(+)-C(-)          | MeCN/THF(1/2)  | 63/18                                    |
| 9     | <sup>n</sup> Bu <sub>4</sub> NClO <sub>4</sub> | <b>Pt(+)-Pb(-)</b> | MeCN/THF(1/2)  | <b>99/trace</b>                          |
| 10    | <sup>n</sup> Bu <sub>4</sub> NClO <sub>4</sub> | Pt(+)-Ni(-)        | MeCN/THF(1/2)  | 83/11                                    |

<sup>a</sup> Reaction conditions: **1a** (0.5 mmol), **2a** (0.75 mmol), electrolyte (1 mmol), solvent (9 mL), graphite rod electrode (0.6\*10 cm), metal plate electrode (1.5\*1.5 cm), 15 mA, 3h (3.7 F/mol), room temperature. <sup>b</sup> Isolated yield of **3aa** and the yield of **4aa**.

In an undivided cell, various solvents were first screened (entries 1-4, Table S1). It was found that mixed solvent of acetonitrile and tetrahydrofuran (1/2, v/v) could exclusively afford the desired product **3aa** with the best yield (entry 4). In sharp contrast, protic solvent MeOH led to mixed products **3aa** and **4aa** in diminished yields (entry 3), owing to undesired cathodic hydrogen evolution. Varying <sup>n</sup>Bu<sub>4</sub>NClO<sub>4</sub> to other electrolytes failed to give better results (entries 5-7). Specifically, <sup>n</sup>Bu<sub>4</sub>NBr could only afford dehydrogenative aminated product **4aa** (entry 7). Investigation on the electrodes (entries 8-10) showed that platinum anode and lead cathode are the most efficient one to afford the desired product **3aa** with nearly quantitative yield (99%, entry 9).

**Table S2.** Optimization of electrochemical oxidative C(sp<sup>3</sup>)-H amidation <sup>a</sup>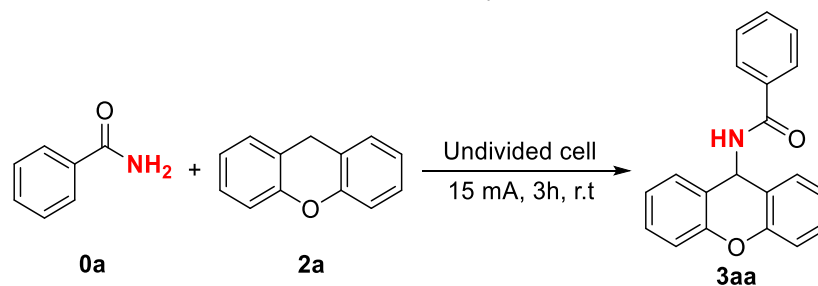

| Entry    | Electrodes        | Solvent              | Electrolyte                                       | Yield (%) <sup>b</sup> |
|----------|-------------------|----------------------|---------------------------------------------------|------------------------|
| 1        | Pt(+)-C(-)        | MeCN                 | <sup>n</sup> Bu <sub>4</sub> NClO <sub>4</sub>    | 64                     |
| 2        | Pt(+)-C(-)        | MeCN/MeOH (8/1)      | <sup>n</sup> Bu <sub>4</sub> NClO <sub>4</sub>    | 34                     |
| <b>3</b> | <b>Pt(+)-C(-)</b> | <b>MeCN/DCM(1/2)</b> | <b><sup>n</sup>Bu<sub>4</sub>NClO<sub>4</sub></b> | <b>70</b>              |
| 4        | Pt(+)-C(-)        | MeCN/THF(1/2)        | <sup>n</sup> Bu <sub>4</sub> NClO <sub>4</sub>    | 68                     |
| 5        | Pt(+)-C(-)        | MeCN/DCM(1/2)        | <sup>n</sup> Bu <sub>4</sub> NBF <sub>4</sub>     | 67                     |
| 6        | Pt(+)-C(-)        | MeCN/ DCM (1/2)      | <sup>n</sup> Bu <sub>4</sub> NOAc                 | 61                     |
| 7        | Pt(+)-C(-)        | MeCN/ DCM (1/2)      | <sup>n</sup> Bu <sub>4</sub> NBr                  | trace                  |
| 8        | C(+)-C(-)         | MeCN/DCM(1/2)        | <sup>n</sup> Bu <sub>4</sub> NClO <sub>4</sub>    | 61                     |
| 9        | C(+)-Pt(-)        | MeCN/DCM(1/2)        | <sup>n</sup> Bu <sub>4</sub> NClO <sub>4</sub>    | 59                     |
| 10       | Ni(+)-C(-)        | MeCN/DCM(1/2)        | <sup>n</sup> Bu <sub>4</sub> NClO <sub>4</sub>    | 68                     |

<sup>a</sup> Reaction conditions: **0a** (0.5 mmol), **2a** (0.75 mmol), electrolyte (1 mmol), solvent (9 mL), graphite rod electrode (0.6\*10 cm), metal plate electrode (1.5\*1.5 cm), 15 mA, 3h (3.7 F/mol), room temperature. <sup>b</sup> Isolated yield of **3aa**.

We also investigated electrochemical oxidative C(sp<sup>3</sup>)-H amidation using benzamide as amidating reagent (Table S2). First, various solvent was screened (entries 1-4), and it showed that mixed solvent of acetonitrile and dichloromethane gave the desired product **3aa** with the best yield (70%, entry 3). Second, replacing <sup>n</sup>Bu<sub>4</sub>NClO<sub>4</sub> with other electrolytes failed to give better results (entries 5-7). Finally, various electrodes were studied. Changing platinum anode or graphite cathode led to decreased yields (entries 8-10).

### 3. General procedure for the electrochemical amidation

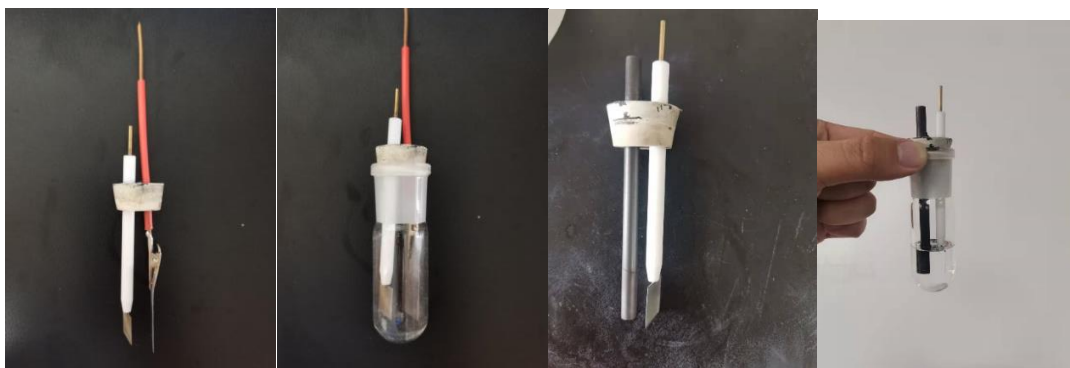

**Figure S1** Electrolysis setup (graphite rod: diameter 0.6 cm, length 10 cm; lead plate: 1.5 cm (width) \*1.5 cm (immersion depth); platinum plate: 1.5 cm \*1.5 cm)

#### Condition I (3aa as example)

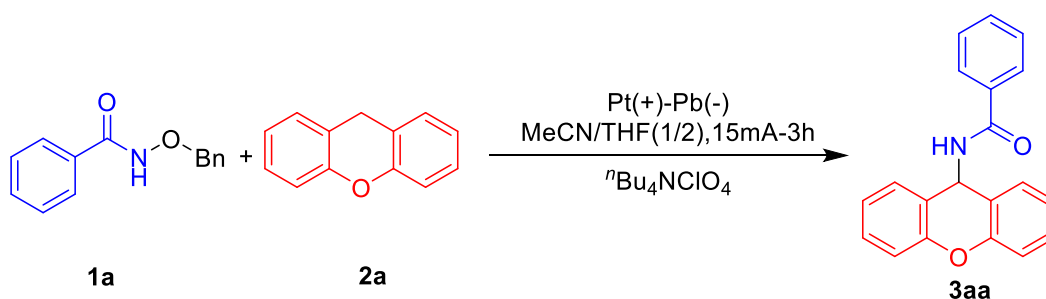

An undivided cell was equipped with a magnet stirrer, platinum plate (1.5 \*1.5 cm<sup>2</sup>), lead plate (1.5\*1.5 cm), as anode and cathode, respectively (the electrolysis setup is shown in Figure S1). The substrate *N*-(benzyloxy)benzamide **1a** (114 mg, 0.5 mmol), 9*H*-xanthene **2a** (137 mg, 0.75 mmol) and <sup>t</sup>Bu<sub>4</sub>NClO<sub>4</sub> (342 mg, 1 mmol) were added to the solvent MeCN/THF (3/6 mL). The resulting mixture was allowed to stir and electrolyze under constant current condition (15 mA) at room temperature for 3 hours. The reaction mixture was condensed with a rotary evaporator. The residue was purified by column chromatography (PE/ EA= 20/1-10/1) on silica gel to afford the desired product **3aa** (149 g) in 99 % yield.

#### Condition II (3aa as example)

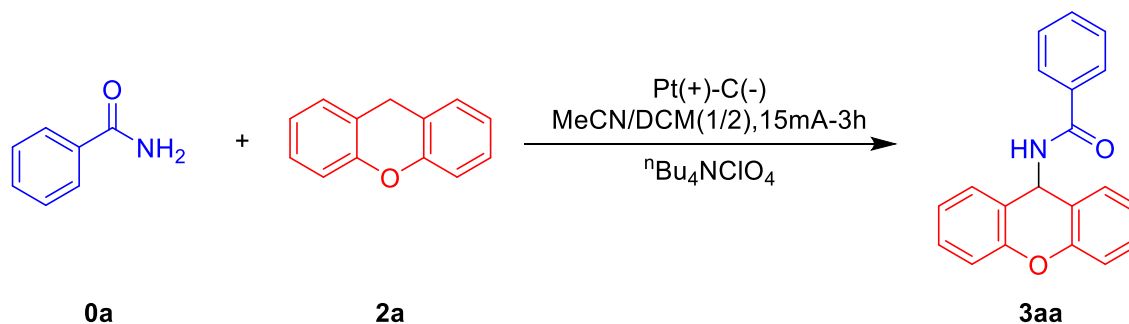

An undivided cell was equipped with a magnet stirrer, platinum plate (1.5 \*1.5 cm<sup>2</sup>), graphite rod (0.6\*10 cm), as anode and cathode, respectively (the electrolysis setup is shown in Figure S1). The substrate benzamide **0a** (61 mg, 0.5 mmol), 9*H*-xanthene **2a** (137 mg, 0.75 mmol) and <sup>t</sup>Bu<sub>4</sub>NClO<sub>4</sub> (342 mg, 1 mmol) were added to the solvent MeCN/DCM (3/6 mL). The resulting

mixture was allowed to stir and electrolyze under constant current condition (15 mA) at room temperature for 3 hours. The reaction mixture was condensed with a rotary evaporator. The residue was purified by column chromatography (PE/ EA= 20/1-10/1) on silica gel to afford the desired product **3aa** (211 g) in 70 % yield.

#### 4. Procedure for gram scale reaction and the reaction using solar cell

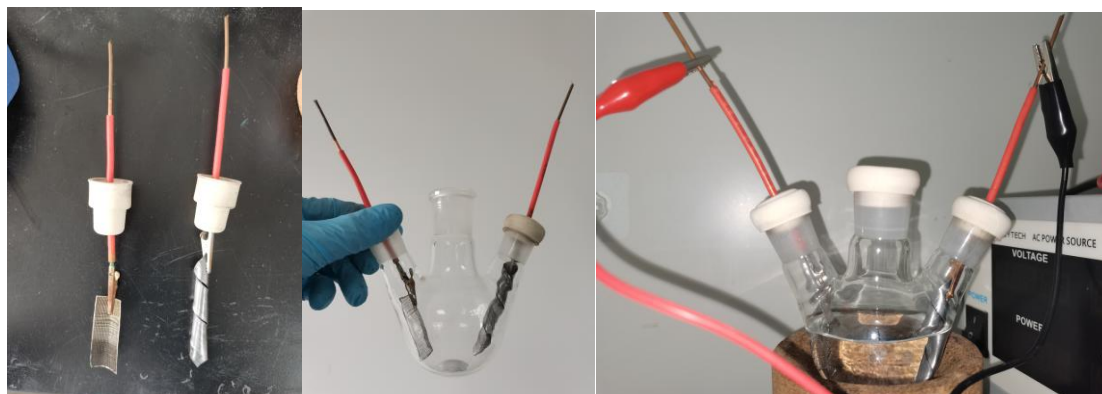

**Figure S2** Gram electrolysis device (platinum mesh: length 5.0 cm, width 2.0 cm, immersion depth 2.0 cm; Lead sheet: length 10.0 cm, width 1.5 cm, immersion depth 4.0 cm)

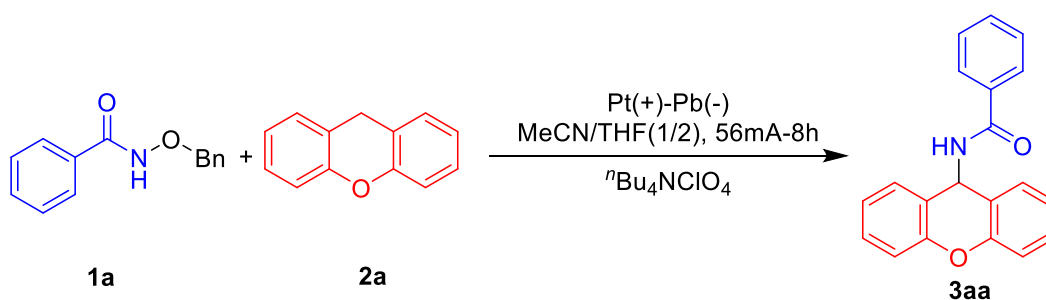

An undivided cell was equipped with a magnet stirrer, platinum mesh (2.0 \*2.0 cm<sup>2</sup>), lead plate (1.5\*4.0 cm), as anode and cathode, respectively (the electrolysis setup is shown in Figure S2). The substrate *N*-(benzyloxy)benzamide **1a** (1.14 g, 5 mmol), 9*H*-xanthene **2a** (1.37 g, 7.5 mmol) and <sup>t</sup>Bu<sub>4</sub>NClO<sub>4</sub> (1.71 g, 5 mmol) were added to the solvent MeCN/THF (15/30 mL). The resulting mixture was allowed to stir and electrolyze under constant current condition (56 mA) at room temperature for 8 hours (the initial voltage is 10 V). The reaction mixture was condensed with a rotary evaporator. The residue was purified by column chromatography (PE/ EA= 20/1-10/1) on silica gel to afford the desired product **3aa** (1.37 g) in 91 % yield.

## Using solar cell as electricity supply

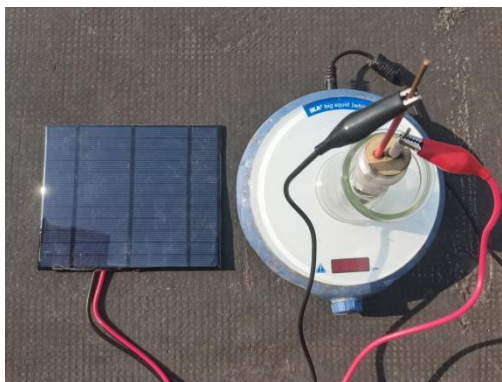

**Figure S3** Electrolysis setup with solar cell (135 mm\*165mm) as electricity supply (10:00-12:00 am, May 16<sup>th</sup>, 2022 at Hefei, China)

An undivided cell was equipped with a magnet stirrer, platinum plate (1.5 \*1.5 cm<sup>2</sup>), lead plate (1.5\*1.5 cm), as anode and cathode, respectively (the electrolysis setup is shown in Figure S3). The substrate *N*-(benzyloxy)benzamide **1a** (114 mg, 0.5 mmol), 9*H*-xanthene **2a** (137 mg, 0.75 mmol) and <sup>n</sup>Bu<sub>4</sub>NClO<sub>4</sub> (342 mg, 1 mmol) were added to the solvent MeCN/THF (3/6 mL). The resulting mixture was allowed to stir and electrolyze using a solar cell as electricity supply under sunlight for 2 hours. The reaction mixture was condensed with a rotary evaporator. The residue was purified by column chromatography (PE/ EA= 20/1-10/1) on silica gel to afford the desired product **3aa** (149 g) in 99 % yield.

## 5. Control experiments

### Reaction progress monitoring

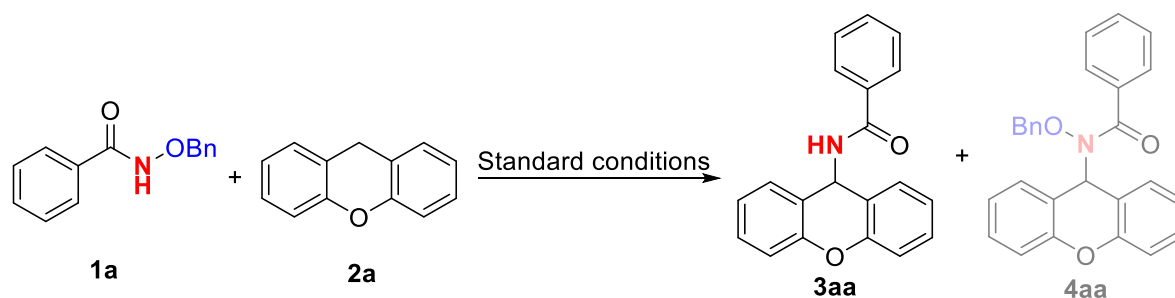

To better understand the reaction intermediate, we performed the reaction under the standard conditions with 0.5 h, 1h, 1.5h, 2h, and 2.5h. Corresponding products **3aa** and **4aa** were isolated and the yields are listed below.

| Time(h)        | 0 | 0.5 | 1  | 1.5 | 2  | 2.5 | 3  |
|----------------|---|-----|----|-----|----|-----|----|
| <b>3aa</b> (%) | 0 | 0   | 19 | 39  | 57 | 68  | 99 |
| <b>4aa</b> (%) | 0 | 26  | 31 | 34  | 46 | 14  | 0  |

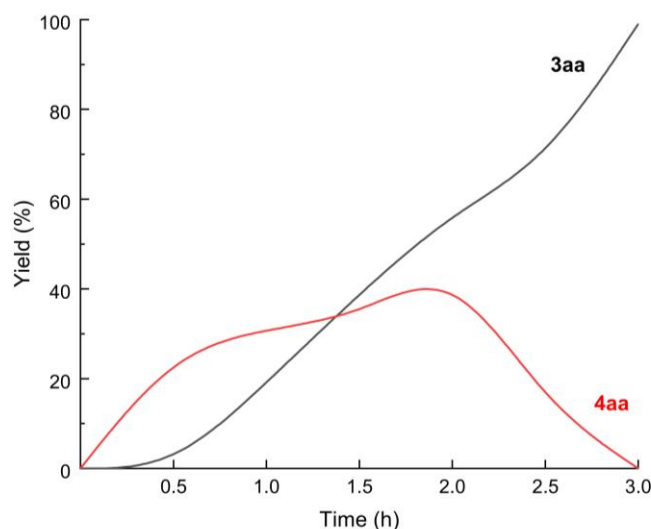

**Figure S4.** Reaction progress monitoring (smoothed curve)

#### Reaction of 4aa under standard conditions

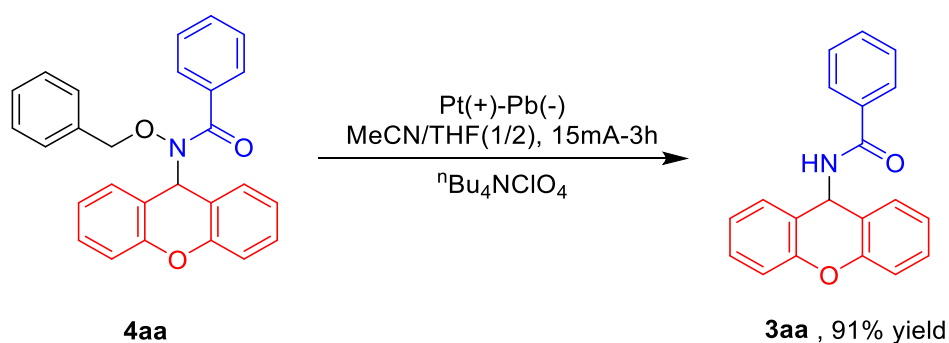

An undivided cell was equipped with a magnet stirrer, platinum plate (1.5 \* 1.5 cm<sup>2</sup>), lead plate (1.5\*1.5 cm), as anode and cathode, respectively (the electrolysis setup is shown in Figure S1). The substrate *N*-(benzyloxy)benzamide **4aa** (204 mg, 0.5 mmol) and <sup>n</sup>Bu<sub>4</sub>NClO<sub>4</sub> (342 mg, 1 mmol) were added to the solvent MeCN/THF (3/6 mL). The resulting mixture was allowed to stir and electrolyze under constant current condition (15 mA) at room temperature for 3 hours. The reaction mixture was condensed with a rotary evaporator. The residue was purified by column chromatography (PE/EA= 20/1-10/1) on silica gel to afford the desired product **3aa** (137 g) in 99 % yield.

### Reaction in divided cell

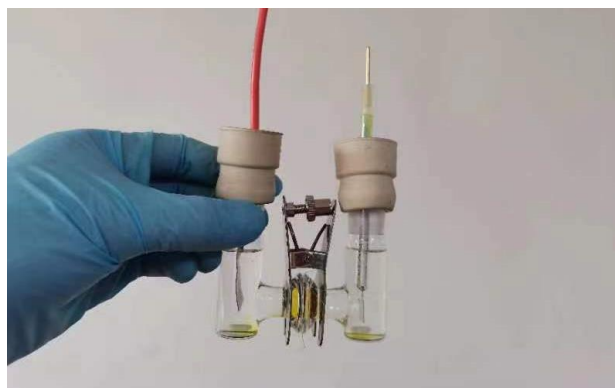

**Figure S5** Divided cell setup (lead plate: 1.5 cm (width) \*1.5 cm (immersion depth); platinum plate: 1.5 cm \*1.5 cm)

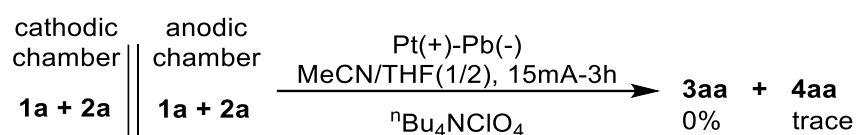

An divided cell was equipped with a magnet stirrer, platinum plate (1.5 \*1.5 cm<sup>2</sup>), lead plate (1.5\*1.5 cm), as anode and cathode, respectively (the electrolysis setup is shown in Figure S5). The substrate *N*-(benzyloxy)benzamide **1a** (114 mg, 0.5 mmol), 9*H*-xanthene **2a** (137 mg, 0.75 mmol) and <sup>n</sup>Bu<sub>4</sub>NClO<sub>4</sub> (342 mg, 2 mmol) were added to the solvent MeCN/THF (6/12 mL). The resulting mixture was divided equally between two chambers and was allowed to stir and electrolyze under constant current condition (15 mA) at room temperature for 3 hours. Only trace of **4aa** was detected in the anodic chamber

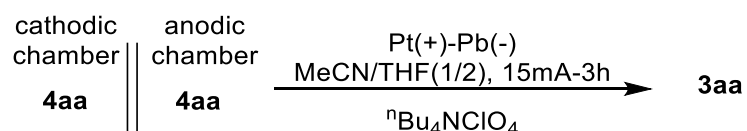

A divided cell was equipped with a magnet stirrer, platinum plate (1.5 \*1.5 cm<sup>2</sup>), lead plate (1.5\*1.5 cm), as anode and cathode, respectively (the electrolysis setup is shown in Figure S5). The substrate *N*-(benzyloxy)benzamide **4aa** (204 mg, 0.5 mmol) and <sup>n</sup>Bu<sub>4</sub>NClO<sub>4</sub> (342 mg, 2 mmol) were added to the solvent MeCN/THF (6/12 mL). The resulting mixture was divided equally between two chambers and was allowed to stir and electrolyze under constant current condition (15 mA) at room temperature for 3 hours. Then the solvent in cathodic chamber was removed with a rotary evaporator. The residue was purified by column chromatography ((PE/ EA= 20/1-10/1) on silica gel to afford product **3aa** (68 mg) in 90 % yield.



### Radical suppression experiment

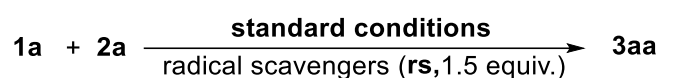

rs: 1,1-diphenylethylene 99%

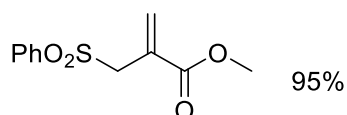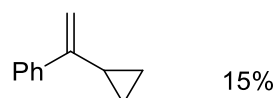

An undivided cell was equipped with a magnet stirrer, platinum plate (1.5 \*1.5 cm<sup>2</sup>), lead plate (1.5\*1.5 cm), as anode and cathode, respectively (the electrolysis setup is shown in Figure S1). The substrate *N*-(benzyloxy)benzamide **1a** (114 mg, 0.5 mmol), 9*H*-xanthene **2a** (137 mg, 0.75 mmol) radical scavengers (1.5 equiv.) and <sup>n</sup>Bu<sub>4</sub>NClO<sub>4</sub> (342 mg, 1 mmol) were added to the solvent MeCN/THF (3/6 mL). The resulting mixture was allowed to stir and electrolyze under constant current condition (15 mA) at room temperature for 3 hours. The reaction mixture was condensed with a rotary evaporator. The residue was purified by column chromatography (PE/ EA= 20/1-10/1) on silica gel to afford the desired product **3aa**.

As shown above, 1.5 equivalents of 1,1-diphenylethylene and methyl 2-((phenylsulfonyl)methyl)acrylate marginally affected the reaction performance, indicating an ionic pathway. Nevertheless, reactive scavenger (1-cyclopropylvinyl)benzene led to diminished yield (15%). This result suggests a radical intermediate may be involved in the reaction. Given these results, aromatic cation arising from the anodic oxidation of 9*H*-xanthene are proposed to be the major intermediate, while radical species is a transient intermediate and can be further oxidized to aromatic cation.

### KIE study

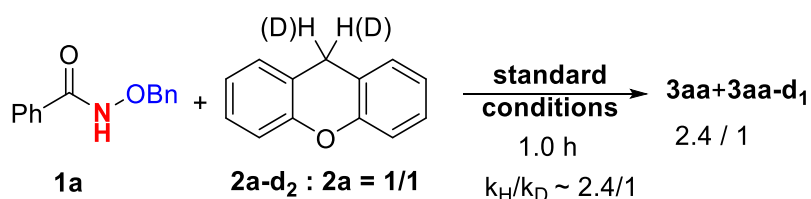

An undivided cell was equipped with a magnet stirrer, platinum plate (1.5 \*1.5 cm<sup>2</sup>), lead plate (1.5\*1.5 cm), as anode and cathode, respectively (the electrolysis setup is shown in Figure S1). The substrate *N*-(benzyloxy) benzamide **1a** (114 mg, 0.5 mmol), 9*H*-xanthene **2a-d<sub>2</sub>** (70 mg, 0.325 mmol), **2a** (69 mg, 0.325 mmol) and <sup>n</sup>Bu<sub>4</sub>NClO<sub>4</sub> (342 mg, 1 mmol) were added to the solvent MeCN/THF (3/6 mL). The resulting mixture was allowed to stir and electrolyze under constant current condition (15 mA) at room temperature for 1 hours. The reaction mixture was condensed with a rotary evaporator. The residue was purified by column chromatography (PE/ EA= 20/1-10/1) on silica gel to afford the desired product **3aa** and **3aa-d<sub>1</sub>** and the ratio of product was determined by <sup>1</sup>H NMR.

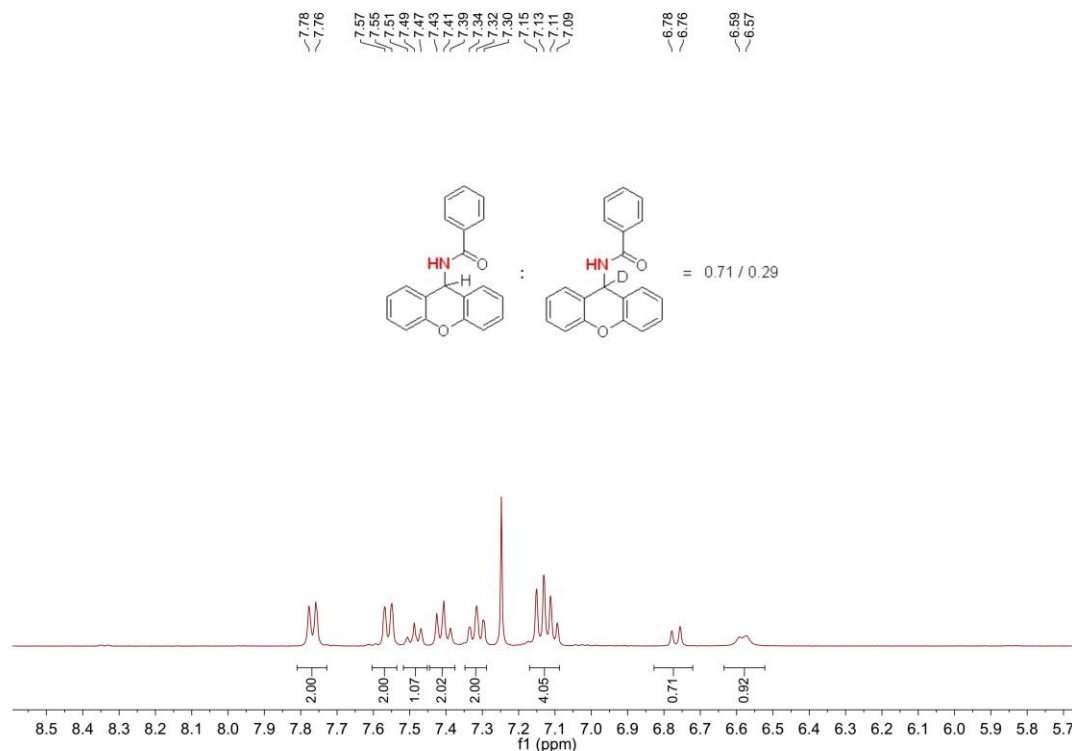

Figure S6. Reaction mixture of **3aa** and **3aa-d<sub>1</sub>**

### Carbocation capture experiment

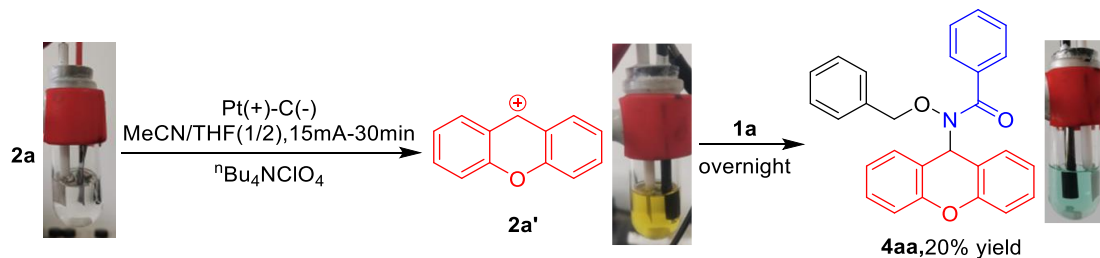

An undivided cell was equipped with a magnet stirrer, platinum plate (1.5 \* 1.5 cm<sup>2</sup>), graphite rod (0.6 \* 10 cm), as anode and cathode, respectively (the electrolysis setup is shown in Figure S1). The substrate 9*H*-xanthene **2a** (136.5 mg, 0.75 mmol) and *n*Bu<sub>4</sub>NClO<sub>4</sub> (342 mg, 1 mmol) were added to the solvent MeCN/THF (3/6 mL). The resulting mixture was allowed to stir and electrolyze under constant current condition (15 mA,) at room temperature for 30 minutes. The colorless reaction mixture changed to yellow. Then the substrate *N*-(benzyloxy)benzamide **1a** (113.5 mg, 0.5 mmol) was added to the reaction mixture. The resulting mixture was allowed to stir at room temperature overnight and the resulting mixture turned to cyan. The combined organic phase was condensed with a rotary evaporator. The residue was purified by column chromatography (PE/ EA= 20/1-10/1) on silica gel to afford the desired product **4aa** (41.7 mg, 20% yield) .

## 6. Cyclic voltammetric experiments

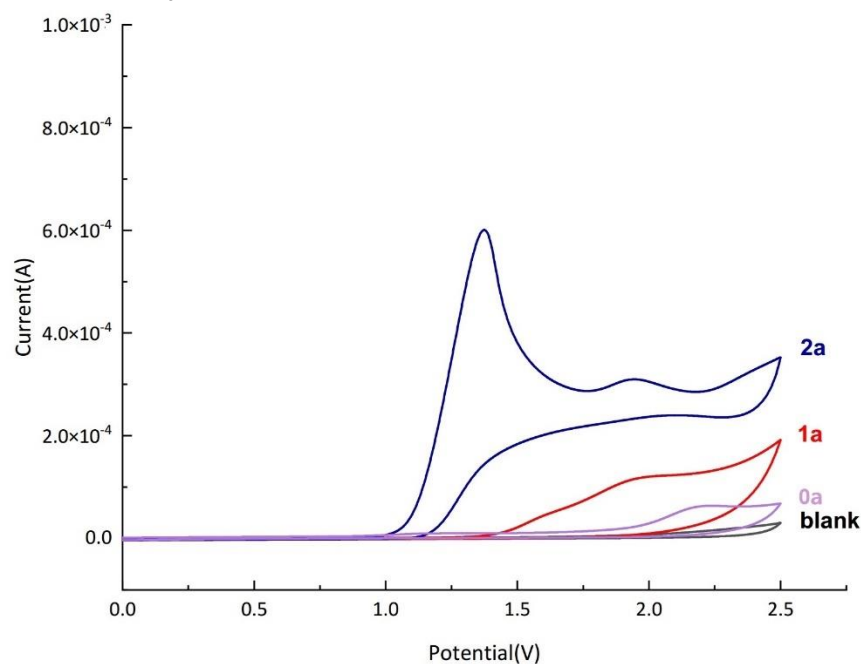

**Figure S7.** Cyclic voltammograms of substrates in 0.1 M LiClO<sub>4</sub> (CH<sub>3</sub>CN), using a glassy carbon working electrode and Pt wire and Ag/AgNO<sub>3</sub> (0.1 M in CH<sub>3</sub>CN) as counter and reference electrodes at a 100 mV·s<sup>-1</sup> scan rate.

As shown in the Fig. S7, substrate **2a** is more susceptible to oxidation when compared with **1a**, with anodic peaks at 1.38V and 1.91V respectively. By contrast, the anodic peak of primary amide **0a** is 2.18 V, which further verifies the inert reactivity of **0a**.

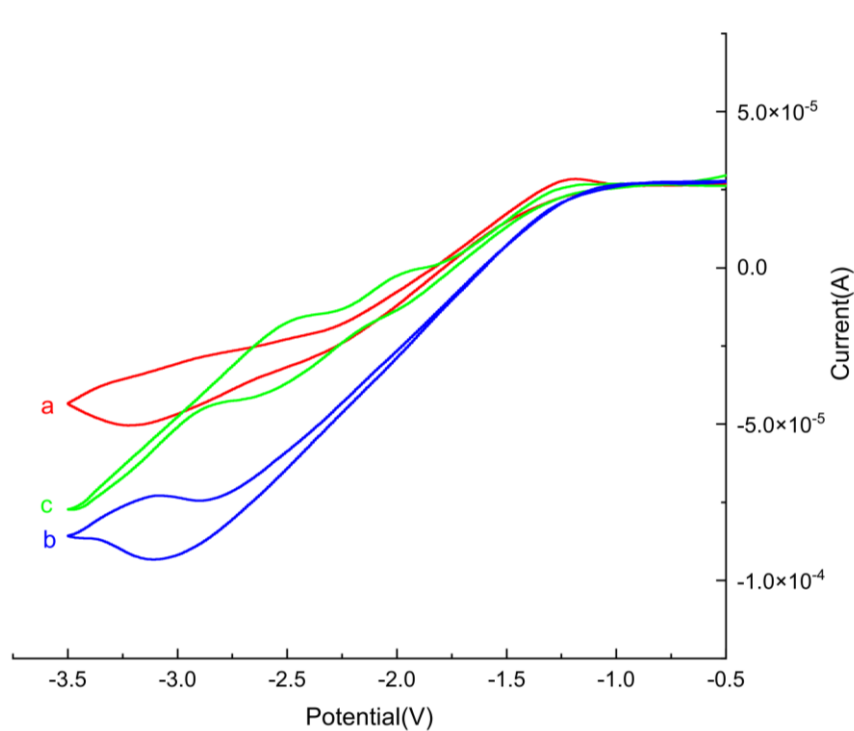

**Figure S8.** Cyclic voltammograms of substrates in 0.1 M <sup>n</sup>Bu<sub>4</sub>ClO<sub>4</sub> (EtOAc), using a glassy carbon working electrode and Pt wire and Ag/AgNO<sub>3</sub> (0.1 M in CH<sub>3</sub>CN) as counter and reference electrodes

at a  $100 \text{ mV}\cdot\text{s}^{-1}$  scan rate: a. 9*H*-xanthene. b. *N*-(benzyloxy)benzamide. c. **4aa**.

The cathodic behavior of substrates **1a**, **2a** and intermediate **4aa** was also explored (Fig. S8). The intermediate **4aa** was found to be the cathodic active species in the reaction with a peak at  $-2.66 \text{ V}$ , which is less negative than that of **1a** ( $-3.11 \text{ V}$ ) and **2a** ( $-3.20 \text{ V}$ )

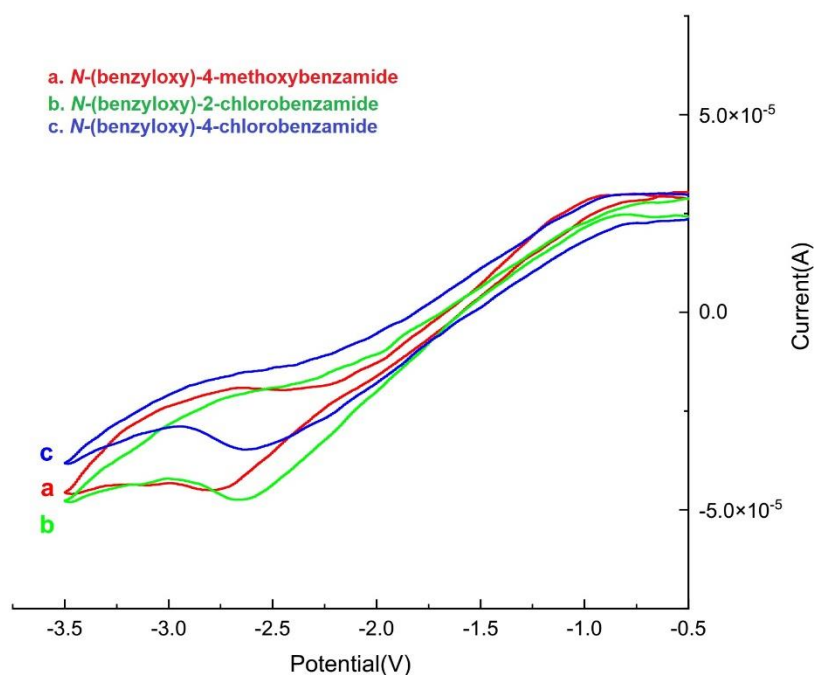

**Figure S9.** Cyclic voltammograms of substrates in  $0.1 \text{ M } n\text{Bu}_4\text{ClO}_4 (\text{EtOAc})$ , using a glassy carbon working electrode and Pt wire and  $\text{Ag}/\text{AgNO}_3$  ( $0.1 \text{ M}$  in  $\text{CH}_3\text{CN}$ ) as counter and reference electrodes at a  $100 \text{ mV}\cdot\text{s}^{-1}$  scan rate.

Reduction potential of various *N*-benzyloxy amides were investigated. It showed that electron-deficient substrate is more reducible than the electron-rich one. Reducible *N*-benzyloxy amides might lead to direct cathodic N-O cleavage rather than sequential oxidative C-H amidation and N-O cleavage.

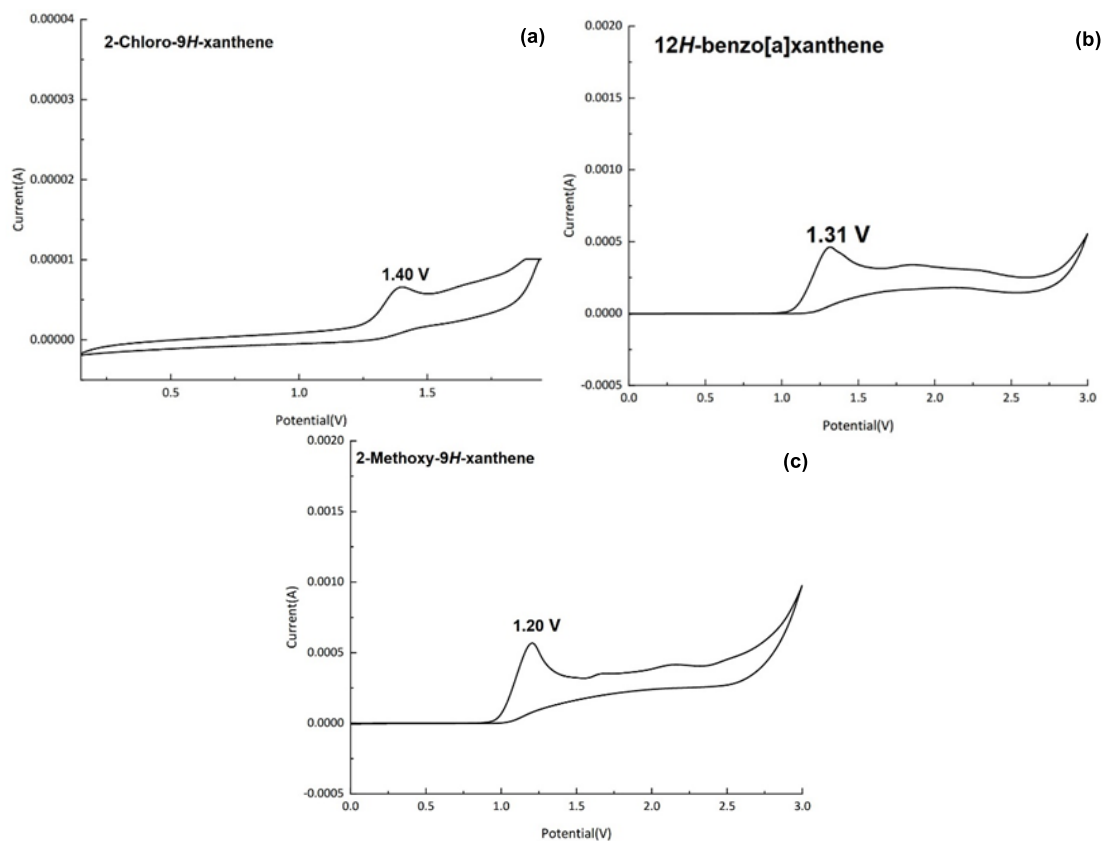

**Figure S10.** Cyclic voltammograms of substrates in 0.1 M LiClO<sub>4</sub> (CH<sub>3</sub>CN), using a glassy carbon working electrode and Pt wire and Ag/AgNO<sub>3</sub> (0.1 M in CH<sub>3</sub>CN) as counter and reference electrodes at a 100 mV·s<sup>-1</sup> scan rate.

We also studied oxidation potential of 9H-xanthanes. Substitution of 9H-xanthanes slightly affected their oxidation potential, and all of the oxidation peaks are around 1.2-1.4 V, which are all lower than that of *N*-benzyloxy amide. These results could serve as explanation of the uniform yields arising from variation of 9H-xanthanes.

## 7. Experimental data for products

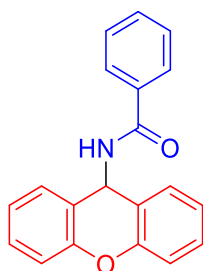

*N*-(9*H*-Xanthen-9-yl)benzamide (**3aa**): 149 mg, 99% yield (**condition I**); 105 mg, 70% yield (**condition II**); 1.37 g, 91% yield (gram scale); white solid, mp 227-228 °C; <sup>1</sup>H NMR (400 MHz, CDCl<sub>3</sub>) δ: 7.78 (d, *J* = 8.0 Hz, 2H), 7.57 (d, *J* = 8.0 Hz, 2H), 7.50 (t, *J* = 8.0 Hz, 1H), 7.42 (t, *J* = 8.0 Hz, 2H), 7.33 (t, *J* = 8.0 Hz, 2H), 7.13 (m, 4H), 6.78 (d, *J* = 12.0 Hz, 1H), 6.61 (d, *J* = 8.0 Hz, 1H); <sup>13</sup>C NMR (100 MHz, CDCl<sub>3</sub>) δ: 166.5, 151.1, 134.0, 131.8, 129.7, 129.4, 128.6, 127.0, 123.7, 121.0, 116.7, 44.3. These data are in accordance with the literature.<sup>6</sup>

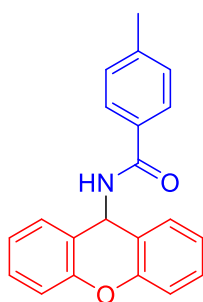

4-Methyl-*N*-(9*H*-xanthen-9-yl)benzamide (**3ab**): 156 mg, 99% yield (**condition I**); 79 mg, 50% yield (**condition II**); white solid, mp 216-219 °C; <sup>1</sup>H NMR (400 MHz, DMSO-*d*<sub>6</sub>) δ: 9.36 (d, *J* = 8.0 Hz, 1H), 7.83 (d, *J* = 8.0 Hz, 2H), 7.40 (d, *J* = 8.0 Hz, 2H), 7.34 (t, *J* = 8.0 Hz, 2H), 7.26 (d, *J* = 8.0 Hz, 2H), 7.15 (m, 4H), 6.55 (d, *J* = 8.0 Hz, 1H), 2.34 (s, 3H); <sup>13</sup>C NMR (100 MHz, DMSO-*d*<sub>6</sub>) δ: 165.7, 150.6, 141.3, 131.1, 129.0, 128.9, 128.8, 127.5, 123.4, 121.8, 116.1, 43.0, 20.9. These data are in accordance with the literature.<sup>7</sup>

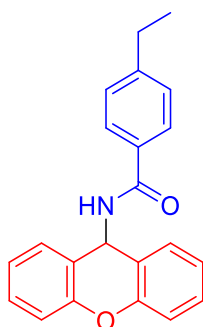

4-Ethyl-*N*-(9*H*-xanthen-9-yl)benzamide (**3ac**): 163 mg, 99% yield; white solid, mp 238-240 °C; <sup>1</sup>H NMR (400 MHz, DMSO-*d*<sub>6</sub>) δ: 9.38 (d, *J* = 4.0 Hz, 1H), 7.86 (d, *J* = 8.0 Hz, 2H), 7.41 (d, *J* = 4.0 Hz, 2H), 7.34 (t, *J* = 8.0 Hz, 2H), 7.29 (d, *J* = 8.0 Hz, 2H), 7.18 (d, *J* = 4.0 Hz, 2H), 7.14 (t, *J* = 4.0 Hz, 2H), 6.56 (d, *J* = 8.0 Hz, 1H), 2.64 (q, 2H), 1.18 (t, *J* = 4.0 Hz, 3H); <sup>13</sup>C NMR (100 MHz, DMSO-*d*<sub>6</sub>) δ: 165.7, 150.6, 147.6, 131.4, 129.0, 128.9, 127.6, 123.4, 121.8, 116.1, 43.0, 28.0, 15.4; HRMS (ESI): caclcd. for C<sub>22</sub>H<sub>19</sub>NO<sub>2</sub> [M+Na]<sup>+</sup>: 352.1308, found 352.1317.

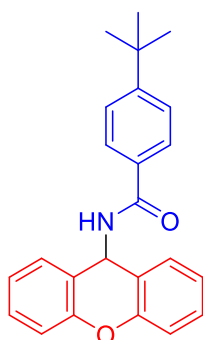

4-(*tert*-Butyl)-*N*-(9*H*-xanthen-9-yl)benzamide (**3ad**): 175 mg, 98% yield; white solid, mp 217-219 °C; <sup>1</sup>H NMR (400 MHz, DMSO-*d*<sub>6</sub>) δ: 9.39 (s, 1H), 7.87 (s, 2H), 7.38 (m, 6H), 7.15 (s, 4H), 6.55 (s, 1H), 1.28 (s, 9H); <sup>13</sup>C NMR (100 MHz, DMSO-*d*<sub>6</sub>) δ: 165.7, 154.3, 150.6, 131.1, 128.9, 127.4, 125.0, 123.4, 121.9, 116.1, 42.9, 34.6, 30.9; HRMS (ESI): caclcd. for C<sub>24</sub>H<sub>23</sub>NO<sub>2</sub> [M+Na]<sup>+</sup>: 380.1621, found 380.1628.

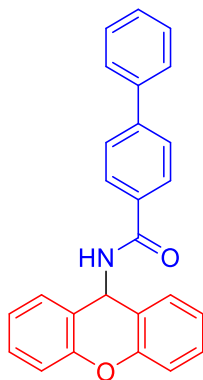

*N*-(9*H*-Xanthen-9-yl)-[1,1'-biphenyl]-4-carboxamide (**3ae**): 149 mg, 79% yield; white solid, mp 284-285 °C; <sup>1</sup>H NMR (400 MHz, DMSO-*d*<sub>6</sub>) δ: 9.51 (d, *J* = 8.0 Hz, 1H), 8.02 (d, *J* = 8.0 Hz, 2H), 7.77 (d, *J* = 8.0 Hz, 2H), 7.72 (d, *J* = 8.0 Hz, 2H), 7.49 (t, *J* = 8.0 Hz, 2H), 7.42 (t, *J* = 8.0 Hz, 3H), 7.35 (t, *J* = 8.0 Hz, 2H), 7.16 (m, 4H), 6.58 (d, *J* = 8.0 Hz, 1H); <sup>13</sup>C NMR (100 MHz, DMSO-*d*<sub>6</sub>) δ: 165.5, 150.6, 143.0, 139.1, 132.7, 129.0, 128.9, 128.2, 128.1, 126.9, 126.5, 123.5, 121.8, 116.1, 43.1; HRMS (ESI): caclcd. for C<sub>26</sub>H<sub>19</sub>NO<sub>2</sub> [M+Na]<sup>+</sup>: 400.1308, found 400.1323.

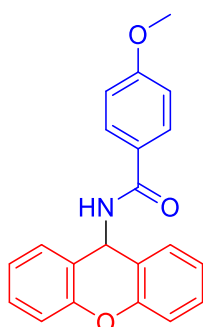

4-Methoxy-*N*-(9*H*-xanthen-9-yl)benzamide (**3af**): 128 mg, 77% yield; white solid, mp 243-244 °C; <sup>1</sup>H NMR (400 MHz, DMSO-*d*<sub>6</sub>) δ: 9.29 (d, *J* = 8.0 Hz, 1H), 7.91 (d, *J* = 8.0 Hz, 2H), 7.40 (d, *J* = 8.0 Hz, 2H), 7.34 (t, *J* = 8.0 Hz, 2H), 7.15 (m, 4H), 6.99 (d, *J* = 8.0 Hz, 2H), 6.55 (d, *J* = 8.0 Hz, 1H), 3.80 (s, 3H); <sup>13</sup>C NMR (100 MHz, DMSO-*d*<sub>6</sub>) δ: 165.3, 161.8, 150.6, 129.4, 129.0, 128.9, 126.0, 123.4, 122.0, 116.1, 113.5, 55.3, 42.9; HRMS (ESI): caclcd. for C<sub>21</sub>H<sub>17</sub>NO<sub>3</sub> [M+Na]<sup>+</sup>: 354.1101, found 354.1109.

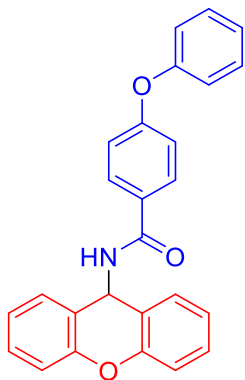

4-Phenoxy-*N*-(9*H*-xanthen-9-yl)benzamide (**3ag**): 133 mg, 68% yield; white solid, mp 222-224 °C; <sup>1</sup>H NMR (400 MHz, DMSO-*d*<sub>6</sub>) δ: 9.41 (d, *J* = 12.0 Hz, 1H), 7.96 (d, *J* = 8.0 Hz, 2H), 7.42 (m, 4H), 7.34 (t, *J* = 8.0 Hz, 2H), 7.18 (m, 5H), 7.05 (m, 4H), 6.55 (d, *J* = 8.0 Hz, 1H); <sup>13</sup>C NMR (100 MHz, DMSO-*d*<sub>6</sub>) δ: 165.0, 159.6, 155.6, 150.6, 130.2, 129.7, 129.0, 128.9, 128.5, 124.2, 123.4, 121.8, 119.4, 117.4, 116.1, 43.0; HRMS (ESI): cacl. for C<sub>26</sub>H<sub>19</sub>FNO<sub>3</sub> [M+Na]<sup>+</sup>: 416.1257, found 416.1243.

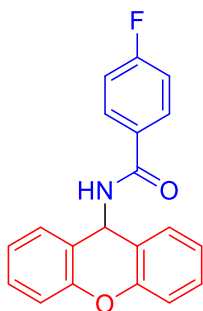

4-Fluoro-*N*-(9*H*-xanthen-9-yl)benzamide (**3ah**): 158 mg, 99% yield (**condition I**); 97 mg, 61% yield (**condition II**); white solid, mp 230-231 °C; <sup>1</sup>H NMR (400 MHz, DMSO-*d*<sub>6</sub>) δ: 9.47 (d, *J* = 8.0 Hz, 1H), 8.00 (t, *J* = 4.0 Hz, 2H), 7.41 (d, *J* = 8.0 Hz, 2H), 7.32 (m, 4H), 7.16(m, 4H) , 6.55 (d, *J* = 8.0 Hz, 1H); <sup>13</sup>C NMR (100 MHz, DMSO-*d*<sub>6</sub>) δ: 164.7, 164.0 (d, *J*<sub>F-C</sub> = 247.0 Hz), 150.6, 130.3 (d, *J*<sub>F-C</sub> = 3.0 Hz), 130.2 (d, *J*<sub>F-C</sub> = 9.0 Hz), 129.0 (d, *J*<sub>F-C</sub> = 5.0 Hz), 123.5, 121.7, 116.1, 115.3, 115.1, 43.1; HRMS (ESI): cacl. for C<sub>20</sub>H<sub>14</sub>FNO<sub>2</sub> [M+Na]<sup>+</sup>: 342.0901, found 342.0901.

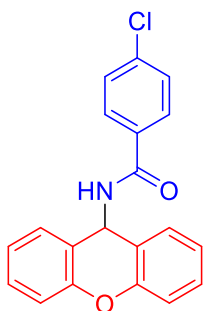

4-Chloro-*N*-(9*H*-xanthen-9-yl)benzamide (**3ai**): 129 mg, 77% yield; white solid, mp 224-225 °C; <sup>1</sup>H NMR (400 MHz, CDCl<sub>3</sub>) δ: 7.71 (d, *J* = 8.0 Hz, 2H), 7.55 (d, *J* = 8.0 Hz, 2H), 7.39 (d, *J* = 8.0 Hz, 2H), 7.33 (t, *J* = 8.0 Hz, 2H), 7.14 (q, 4H), 6.75 (d, *J* = 8.0 Hz, 1H), 6.55 (d, *J* = 12.0 Hz, 1H); <sup>13</sup>C NMR (100 MHz, DMSO-*d*<sub>6</sub>) δ: 164.8, 150.6, 136.3, 132.6, 129.4, 129.03, 128.99, 128.4, 123.5, 121.6, 116.1, 43.2; HRMS (ESI): cacl. for C<sub>20</sub>H<sub>14</sub>NO<sub>2</sub>Cl [M+Na]<sup>+</sup>: 358.0605, found 358.0610.



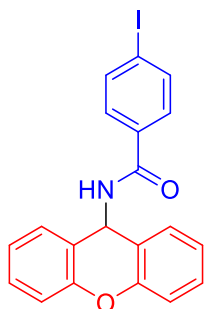

4-Iodo-*N*-(9*H*-xanthen-9-yl)benzamide (**3aj**): 70 mg, 33% yield; white solid, mp 268-269 °C; <sup>1</sup>H NMR (400 MHz, CDCl<sub>3</sub>) δ: 7.77 (d, *J* = 8.0 Hz, 2H), 7.54 (d, *J* = 8.0 Hz, 2H), 7.50 (d, *J* = 12.0 Hz, 2H), 7.33 (t, *J* = 8.0 Hz, 2H), 7.14 (q, 4H), 6.75 (d, *J* = 8.0 Hz, 1H), 6.55 (d, *J* = 8.0 Hz, 1H); <sup>13</sup>C NMR (100 MHz, DMSO-*d*<sub>6</sub>) δ: 165.1, 150.6, 137.2, 133.3, 129.5, 129.02, 128.98, 123.5, 121.6, 116.1, 99.1, 43.2; HRMS (ESI): cacl. for C<sub>20</sub>H<sub>14</sub>INO<sub>2</sub> [M+Na]<sup>+</sup>: 449.9961, found 449.9960.

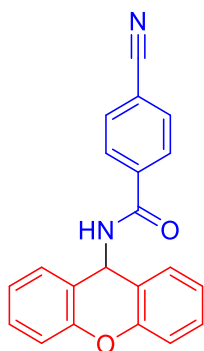

4-Cyano-*N*-(9*H*-xanthen-9-yl)benzamide (**3ak**): 119 mg, 73% yield (**condition I**); 70 mg, 43% yield (**condition II**); white solid, mp 216-220 °C; <sup>1</sup>H NMR (400 MHz, DMSO-*d*<sub>6</sub>) δ: 9.70 (d, *J* = 8.0 Hz, 1H), 8.06 (d, *J* = 8.0 Hz, 2H), 7.95 (d, *J* = 8.0 Hz, 2H), 7.43 (d, *J* = 8.0 Hz, 2H), 7.36 (t, *J* = 4.0 Hz, 2H), 7.16 (m, 4H), 6.56 (d, *J* = 8.0 Hz, 1H); <sup>13</sup>C NMR (100 MHz, DMSO-*d*<sub>6</sub>) δ: 164.4, 150.6, 137.9, 132.4, 129.08, 129.05, 128.3, 123.5, 121.3, 118.3, 116.2, 113.8, 43.4; HRMS (ESI): cacl. for C<sub>21</sub>H<sub>14</sub>N<sub>2</sub>O<sub>2</sub> [M+Na]<sup>+</sup>: 349.0948, found 349.0953.

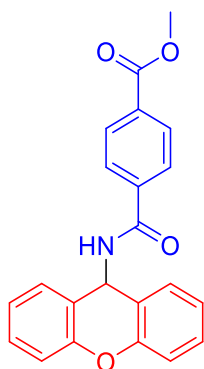

Methyl 4-((9*H*-xanthen-9-yl)carbamoyl)benzoate (**3al**): 178 mg, 99% yield; white solid, mp 249-251 °C; <sup>1</sup>H NMR (400 MHz, DMSO-*d*<sub>6</sub>) δ: 9.65 (d, *J* = 12.0 Hz, 1H), 8.03 (s, 4H), 7.44 (d, *J* = 8.0 Hz, 2H), 7.35 (t, *J* = 8.0 Hz, 2H), 7.16 (m, 4H), 6.57 (d, *J* = 8.0 Hz, 1H), 3.87 (s, 3H); <sup>13</sup>C NMR (100 MHz, DMSO-*d*<sub>6</sub>) δ: 165.7, 165.0, 150.6, 138.0, 131.9, 129.1, 129.0, 127.9, 123.5, 121.5, 116.2, 52.3, 43.3; HRMS (ESI): cacl. for C<sub>22</sub>H<sub>17</sub>NO<sub>4</sub> [M+Na]<sup>+</sup>: 382.1050, found 382.1056.

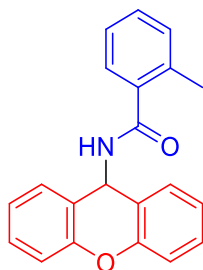

2-Methyl-*N*-(9*H*-xanthen-9-yl)benzamide (**3am**): 139 mg, 88% yield (**condition I**); 85 mg, 54% yield (**condition II**); white solid, mp 204-205 °C;  $^1\text{H}$  NMR (400 MHz, DMSO- $d_6$ )  $\delta$ : 9.29 (d,  $J$  = 8.0 Hz, 1H), 7.50 (d,  $J$  = 8.0 Hz, 2H), 7.34 (m, 4H), 7.21 (m, 6H), 6.51 (d,  $J$  = 8.0 Hz, 1H), 2.38 (s, 3H);  $^{13}\text{C}$  NMR (100 MHz, DMSO- $d_6$ )  $\delta$ : 150.8, 134.4, 133.2, 131.8, 131.7, 131.6, 129.7, 128.6, 128.5, 128.3, 123.6, 123.2, 115.9, 45.1; HRMS (ESI): cacl. for  $\text{C}_{21}\text{H}_{17}\text{NO}_2$  [ $\text{M}+\text{Na}$ ] $^+$ : 338.1151, found 338.1154.

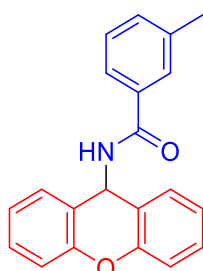

3-Methyl-*N*-(9*H*-xanthen-9-yl)benzamide (**3an**): 156 mg, 99% yield(**condition I**); 103 mg, 65% yield (**condition II**); white solid, mp 204-205 °C;  $^1\text{H}$  NMR (400 MHz, DMSO- $d_6$ )  $\delta$ : 9.39 (d,  $J$  = 8.0 Hz, 1H), 7.74 (d,  $J$  = 12.0 Hz, 2H), 7.41 (d,  $J$  = 8.0 Hz, 2H), 7.35 (m, 4H), 7.16 (m, 4H), 6.56 (d,  $J$  = 8.0 Hz, 1H), 2.33 (s, 3H);  $^{13}\text{C}$  NMR (100 MHz, DMSO- $d_6$ )  $\delta$ : 165.8, 150.6, 137.5, 133.8, 132.0, 129.0, 128.9, 128.2, 128.0, 124.7, 123.4, 121.8, 116.1, 43.0, 20.9; HRMS (ESI): cacl. for  $\text{C}_{21}\text{H}_{17}\text{NO}_2$  [ $\text{M}+\text{Na}$ ] $^+$ : 338.1152, found 338.1148.

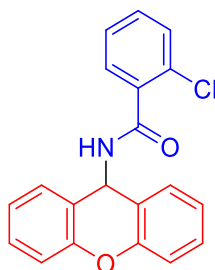

2-Chloro-*N*-(9*H*-xanthen-9-yl)benzamide (**3ao**): 62 mg, 37% yield; white solid, mp 223-224 °C;  $^1\text{H}$  NMR (400 MHz, DMSO- $d_6$ )  $\delta$ : 9.47 (d,  $J$  = 12.0 Hz, 1H), 7.55 (d,  $J$  = 8.0 Hz, 2H), 7.48 (m, 2H), 7.40 (m, 4H), 7.20 (m, 4H), 6.51 (d,  $J$  = 8.0 Hz, 1H);  $^{13}\text{C}$  NMR (100 MHz, DMSO- $d_6$ )  $\delta$ : 166.1, 150.4, 136.5, 130.8, 129.8, 129.5, 129.0, 128.7, 127.1, 123.5, 121.2, 116.2, 42.8; HRMS (ESI): cacl. for  $\text{C}_{20}\text{H}_{14}\text{ClNO}_2$  [ $\text{M}+\text{Na}$ ] $^+$ : 358.0605, found 358.0609.

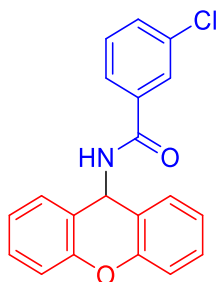

3-Chloro-*N*-(9*H*-xanthen-9-yl)benzamide (**3ap**): 142 mg, 85% yield; white solid, mp 231-232 °C; <sup>1</sup>H NMR (400 MHz, DMSO-*d*<sub>6</sub>) δ: 9.56 (d, *J* = 8.0 Hz, 1H), 7.90 (m, 2H), 7.61 (d, *J* = 8.0 Hz, 1H), 7.51 (d, *J* = 8.0 Hz, 1H), 7.42 (d, *J* = 8.0 Hz, 2H), 7.35 (t, *J* = 8.0 Hz, 2H), 7.16 (m, 4H), 6.55 (d, *J* = 8.0 Hz, 1H); <sup>13</sup>C NMR (100 MHz, DMSO-*d*<sub>6</sub>) δ: 164.3, 150.6, 135.8, 133.2, 131.3, 130.3, 129.1, 129.0, 127.2, 126.3, 123.5, 121.5, 116.2, 43.3; HRMS (ESI): cacl. for C<sub>20</sub>H<sub>14</sub>NO<sub>2</sub>Cl [M+Na]<sup>+</sup>: 358.0605, found 358.0610.

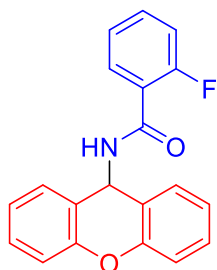

2-Fluoro-*N*-(9*H*-xanthen-9-yl)benzamide (**3aq**): 139 mg, 87% yield; 1.20 g, 75% yield (gram scale); white solid, mp 192-193 °C; <sup>1</sup>H NMR (400 MHz, DMSO-*d*<sub>6</sub>) δ: 9.38 (d, *J* = 8.0 Hz, 1H), 7.61 (t, *J* = 8.0 Hz, 1H), 7.51 (m, 3H), 7.35 (t, *J* = 8.0 Hz, 2H), 7.27 (t, *J* = 8.0 Hz, 2H), 7.18 (t, *J* = 8.0 Hz, 4H), 6.50 (d, *J* = 4.0 Hz, 1H); <sup>13</sup>C NMR (100 MHz, DMSO-*d*<sub>6</sub>) δ: 163.8 (d, *J*<sub>F-C</sub> = 10.0 Hz), 159.1 (d, *J*<sub>F-C</sub> = 248 Hz), 150.6, 132.4 (d, *J*<sub>F-C</sub> = 8.0 Hz), 129.9 (d, *J*<sub>F-C</sub> = 2.0 Hz), 129.0, 128.9, 124.4 (d, *J*<sub>F-C</sub> = 3.0 Hz), 123.5, 121.4 (d, *J*<sub>F-C</sub> = 3.0 Hz), 116.2, 116.0, 43.20 (d, *J*<sub>F-C</sub> = 8.0 Hz); HRMS (ESI): cacl. for C<sub>20</sub>H<sub>14</sub>FNO<sub>2</sub> [M+Na]<sup>+</sup>: 342.0901, found 342.0888.

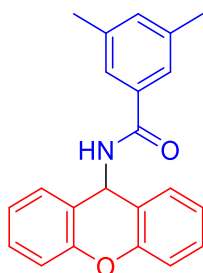

3,5-Dimethyl-*N*-(9*H*-xanthen-9-yl)benzamide (**3ar**): 163 mg, 99% yield; white solid, mp 243-247 °C; <sup>1</sup>H NMR (400 MHz, DMSO-*d*<sub>6</sub>) δ: 9.32 (d, *J* = 8.0 Hz, 1H), 7.53 (s, 2H), 7.39 (d, *J* = 8.0 Hz, 2H), 7.33 (t, *J* = 8.0 Hz, 2H), 7.16 (m, 5H), 6.55 (d, *J* = 8.0 Hz, 1H), 2.29 (s, 6H); <sup>13</sup>C NMR (100 MHz, DMSO-*d*<sub>6</sub>) δ: 165.9, 150.6, 137.4, 133.8, 132.6, 129.0, 128.9, 125.2, 123.4, 121.8, 116.1, 42.9, 20.8; HRMS (ESI): cacl. for C<sub>22</sub>H<sub>19</sub>NO<sub>2</sub> [M+Na]<sup>+</sup>: 352.1308, found 352.1314.

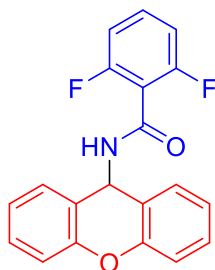

2,6-Difluoro-*N*-(9*H*-xanthen-9-yl)benzamide (**3as**): 85 mg, 50% yield; white solid, mp 213-215 °C; <sup>1</sup>H NMR (400 MHz, DMSO-*d*<sub>6</sub>) δ: 9.73 (d, *J* = 8.0 Hz, 1H), 7.50 (m, 3H), 7.37 (t, *J* = 8.0 Hz, 2H), 7.19 (m, 6H), 6.53 (d, *J* = 12.0 Hz, 1H); <sup>13</sup>C NMR (100 MHz, DMSO-*d*<sub>6</sub>) δ: 159.5, 153.7 (dd, *J*<sub>F-C</sub> = 8.0 Hz, *J*<sub>F-C</sub> = 247.0 Hz), 150.4, 131.7 (t, *J*<sub>F-C</sub> = 9.5 Hz), 129.2, 128.7, 123.6, 121.0, 116.3, 115.1 (t, *J*<sub>F-C</sub> = 23.0 Hz), 111.9 (dd, *J*<sub>F-C</sub> = 5.0 Hz, *J*<sub>F-C</sub> = 19.0 Hz), 43.1. HRMS (ESI): cacl. for C<sub>20</sub>H<sub>13</sub>F<sub>2</sub>NO<sub>2</sub> [M+Na]<sup>+</sup>: 360.0807, found 360.0809.

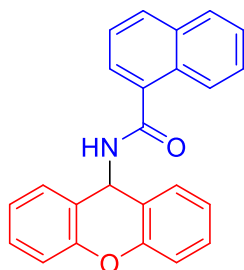

*N*-(9*H*-Xanthen-9-yl)-1-naphthamide (**3at**): 174 mg, 99% yield (**condition I**); 107 mg, 61% yield (**condition II**); white solid, mp 243-245 °C; <sup>1</sup>H NMR (400 MHz, DMSO-*d*<sub>6</sub>) δ: 9.57 (d, *J* = 8.0 Hz, 1H), 8.31 (d, *J* = 8.0 Hz, 1H), 8.00 (t, *J* = 8.0 Hz, 2H), 7.60 (d, *J* = 8.0 Hz, 5H), 7.52 (t, *J* = 8.0 Hz, 1H), 7.37 (t, *J* = 8.0 Hz, 2H), 7.21 (m, 4H), 6.64 (d, *J* = 8.0 Hz, 1H); <sup>13</sup>C NMR (100 MHz, DMSO-*d*<sub>6</sub>) δ: 168.1, 150.6, 134.0, 133.1, 130.0, 129.8, 129.0, 128.2, 126.8, 126.2, 125.3, 125.2, 124.9, 123.6, 121.6, 116.2, 40.1; HRMS (ESI): cacl. for C<sub>24</sub>H<sub>17</sub>NO<sub>2</sub> [M+Na]<sup>+</sup>: 374.1151, found 374.1154.

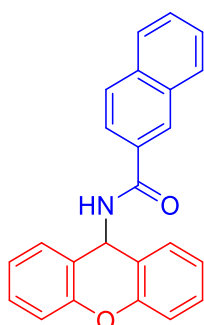

*N*-(9*H*-Xanthen-9-yl)-2-naphthamide (**3au**): 174 mg, 99% yield (**condition I**); 109 mg, 62% yield (**condition II**); white solid, mp 249-250 °C; <sup>1</sup>H NMR (400 MHz, CDCl<sub>3</sub>) δ: 8.28 (s, 1H), 7.87 (t, *J* = 8.0 Hz, 4H), 7.57 (d, *J* = 4.0 Hz, 2H), 7.52 (m, 2H), 7.34 (t, *J* = 8.0 Hz, 2H), 7.16 (m, 4H), 6.84 (d, *J* = 8.0 Hz, 1H), 6.79 (d, *J* = 12.0 Hz, 1H); <sup>13</sup>C NMR (100 MHz, DMSO-*d*<sub>6</sub>) δ: 165.8, 150.7, 134.2, 132.1, 131.2, 129.1, 129.0, 128.8, 127.83, 127.78, 127.7, 127.6, 126.7, 124.4, 123.5, 121.8, 116.2, 43.2; HRMS (ESI): cacl. for C<sub>24</sub>H<sub>17</sub>NO<sub>2</sub> [M+Na]<sup>+</sup>: 374.1152, found 374.1159.

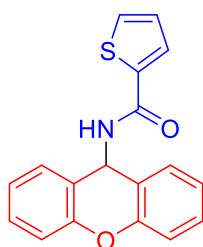

*N*-(9*H*-Xanthen-9-yl)thiophene-2-carboxamide (**3av**): 152 mg, 99% yield; yellow solid, mp 217-220 °C; <sup>1</sup>H NMR (400 MHz, DMSO-*d*<sub>6</sub>) δ: 9.45 (d, *J* = 12.0 Hz, 1H), 7.80 (s, 2H), 7.41 (d, *J* = 8.0 Hz, 2H), 7.35 (t, *J* = 8.0 Hz, 2H), 7.15 (m, 5H), 6.50 (d, *J* = 8.0 Hz, 1H); <sup>13</sup>C NMR (100 MHz, DMSO-*d*<sub>6</sub>) δ: 160.7, 150.6, 139.5, 131.3, 129.1, 129.0, 128.5, 128.0, 123.5, 121.5, 116.2, 43.0; HRMS (ESI): cacl. for C<sub>18</sub>H<sub>13</sub>NO<sub>2</sub>S [M+Na]<sup>+</sup>: 330.0559, found 330.0562.

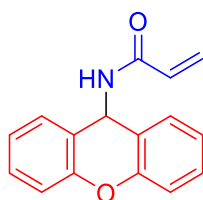

*N*-(9*H*-Xanthen-9-yl)acrylamide (**3aw**): 104 mg, 83% yield (**condition I**); 62 mg, 49% yield (**condition II**); white solid, mp 249-250 °C; <sup>1</sup>H NMR (400 MHz, CDCl<sub>3</sub>) δ: 7.50 (d, *J* = 8.0 Hz, 2H), 7.31 (t, *J* = 8.0 Hz, 2H), 7.12 (q, 4H), 6.62 (d, *J* = 12.0 Hz, 1H), 6.38 (d, *J* = 16.0 Hz, 1H), 6.05 (m, 2H), 5.73 (d, *J* = 12.0 Hz, 1H); <sup>13</sup>C NMR (100 MHz, DMSO-*d*<sub>6</sub>) δ: 164.0, 150.6, 131.3, 129.2, 129.1, 126.3, 123.6, 121.6, 116.2, 42.6. These data are in accordance with the literature.<sup>8</sup>

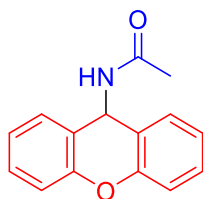

*N*-(9*H*-Xanthen-9-yl)acetamide (**3ax**): 51 mg, 43% yield; white solid, mp 227-232 °C; <sup>1</sup>H NMR (400 MHz, CDCl<sub>3</sub>) δ: 7.48 (d, *J* = 8.0 Hz, 2H), 7.31 (t, *J* = 8.0 Hz, 2H), 7.11 (m, 4H), 6.50 (d, *J* = 8.0 Hz, 1H), 6.03 (d, *J* = 8.0 Hz, 1H), 2.01 (s, 3H); <sup>13</sup>C NMR (100 MHz, CDCl<sub>3</sub>) δ: 169.0, 151.1, 129.7, 129.3, 123.6, 121.1, 116.6, 43.9, 23.4. These data are in accordance with the literature.<sup>6</sup>

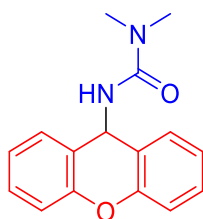

1,1-Dimethyl-3-(9*H*-xanthen-9-yl)urea (**3ay**): 44 mg, 33% yield; white solid, mp 226-228 °C; <sup>1</sup>H NMR (400 MHz, CDCl<sub>3</sub>) δ: 7.56 (d, *J* = 8.0 Hz, 2H), 7.29 (t, *J* = 8.0 Hz, 2H), 7.11 (t, *J* = 8.0 Hz, 4H), 6.40 (d, *J* = 8.0 Hz, 1H), 4.92 (d, *J* = 8.0 Hz, 1H), 2.90 (s, 6H); <sup>13</sup>C NMR (100 MHz, CDCl<sub>3</sub>) δ: 157.7, 151.0, 129.7, 128.9, 123.4, 122.4, 116.4, 44.9, 36.2; HRMS (ESI): cacl. for C<sub>16</sub>H<sub>16</sub>N<sub>2</sub>O<sub>2</sub> [M+Na]<sup>+</sup>: 291.1104, found 291.1100.

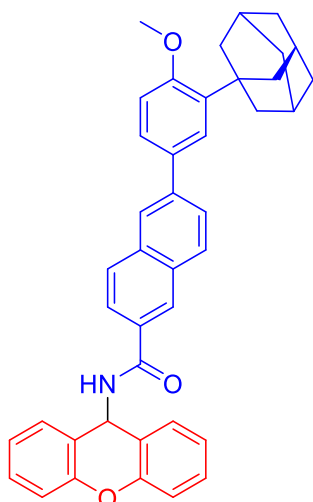

6-(3-(Adamantan-1-yl)-4-methoxyphenyl)-*N*-(9*H*-xanthen-9-yl)-2-naphthamide (**3az**): 186 mg, 63% yield (**condition I**); trace (**condition II**); white solid, mp 241-242 °C; <sup>1</sup>H NMR (400 MHz, DMSO-*d*<sub>6</sub>) δ: 9.59 (d, *J* = 8.0 Hz, 1H), 8.52 (s, 1H), 8.19 (s, 1H), 8.04 (m, 3H), 7.86 (d, *J* = 8.0 Hz, 1H), 7.64 (d, *J* = 8.0 Hz, 1H), 7.57 (s, 1H), 7.48 (d, *J* = 8.0 Hz, 2H), 7.36 (t, *J* = 8.0 Hz, 2H), 7.20 (d, *J* = 8.0 Hz, 2H), 7.16 (t, *J* = 8.0 Hz, 2H), 7.11 (d, *J* = 8.0 Hz, 1H), 6.64 (d, *J* = 12.0 Hz, 1H), 3.86 (s, 3H), 2.13 (s, 6H), 2.06 (s, 3H), 1.75 (s, 6H); <sup>13</sup>C NMR (100 MHz, DMSO-*d*<sub>6</sub>) δ: 165.8, 158.5, 150.7, 139.5, 138.0, 134.8, 131.5, 130.84, 130.78, 129.4, 129.1, 129.0, 128.0, 127.5, 125.8, 125.6, 125.0, 124.7, 124.0, 123.5, 121.8, 116.2, 112.7, 55.3, 43.2, 40.1, 36.6, 36.5, 28.4; HRMS (ESI): cacl. for C<sub>27</sub>H<sub>23</sub>NO<sub>3</sub> [M+Na]<sup>+</sup>: 614.2666, found 614.2661.

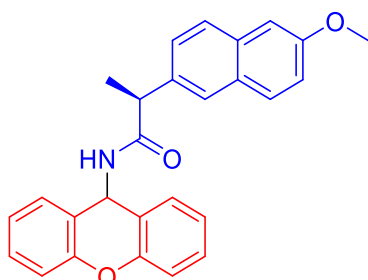

(*S*)-2-(6-Methoxynaphthalen-2-yl)-*N*-(9*H*-xanthen-9-yl)propanamide (**3ba**): 55 mg, 27% yield; white solid, mp 211-215 °C; <sup>1</sup>H NMR (400 MHz, DMSO-*d*<sub>6</sub>) δ: 9.01 (d, *J* = 8.0 Hz, 1H), 7.76 (m, 3H), 7.47 (d, *J* = 8.0 Hz, 1H), 7.36 (m, 2H), 7.26 (m, 2H), 7.11 (m, 4H), 7.04 (d, *J* = 4.0 Hz, 1H), 6.91 (t, *J* = 8.0 Hz, 1H), 6.28 (d, *J* = 8.0 Hz, 1H), 3.87 (s, 3H), 3.78 (d, *J* = 4.0 Hz, 1H), 1.49 (d, *J* = 8.0 Hz, 3H); <sup>13</sup>C NMR (100 MHz, DMSO-*d*<sub>6</sub>) δ: 173.1, 157.0, 150.4, 137.2, 133.1, 129.0, 128.7, 128.4, 126.6, 126.4, 125.3, 123.5, 123.2, 121.78, 121.71, 118.6, 116.1, 55.1, 44.9, 42.3, 18.5; HRMS (ESI): cacl. for C<sub>27</sub>H<sub>23</sub>NO<sub>3</sub> [M+Na]<sup>+</sup>: 432.1570, found 432.1576.

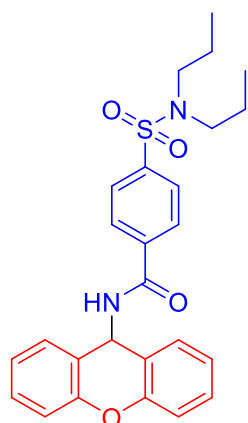

4-(*N,N*-Dipropylsulfamoyl)-*N*-(9*H*-xanthen-9-yl)benzamide (**3bb**): 100 mg, 49% yield; white solid, mp 183-184 °C;  $^1\text{H}$  NMR (400 MHz, DMSO- $d_6$ )  $\delta$ : 9.68 (d,  $J$  = 8.0 Hz, 1H), 8.08 (d,  $J$  = 8.0 Hz, 2H), 7.88 (d,  $J$  = 8.0 Hz, 2H), 7.44 (d,  $J$  = 4.0 Hz, 2H), 7.36 (t,  $J$  = 4.0 Hz, 2H), 7.16 (m, 4H), 6.56 (d,  $J$  = 8.0 Hz, 1H), 3.03 (t,  $J$  = 4.0 Hz, 4H), 1.46 (m, 4H), 0.80 (t,  $J$  = 8.0 Hz, 6H);  $^{13}\text{C}$  NMR (100 MHz, DMSO- $d_6$ )  $\delta$ : 164.6, 150.6, 141.9, 137.4, 129.09, 129.06, 128.5, 126.8, 123.5, 121.4, 116.2, 49.6, 43.3 21.6, 10.9; HRMS (ESI): cacl. for  $\text{C}_{26}\text{H}_{28}\text{N}_2\text{O}_4\text{S}$  [ $\text{M}+\text{Na}$ ] $^+$ : 487.1662, found 487.1645.

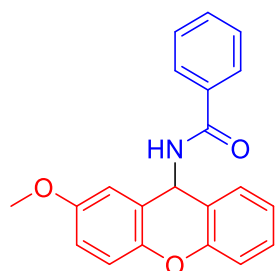

*N*-(2-Methoxy-9*H*-xanthen-9-yl)benzamide (**3bc**): 137 mg, 83% yield; white solid, mp 256-257 °C;  $^1\text{H}$  NMR (400 MHz, DMSO- $d_6$ )  $\delta$ : 9.43 (d,  $J$  = 12.0 Hz, 1H), 7.92 (d,  $J$  = 8.0 Hz, 2H), 7.54 (t,  $J$  = 4.0 Hz, 1H), 7.46 (t,  $J$  = 8.0 Hz, 2H), 7.40 (d,  $J$  = 8.0 Hz, 1H), 7.33 (t,  $J$  = 8.0 Hz, 1H), 7.12 (m, 3H), 6.94 (m, 2H), 6.53 (d,  $J$  = 8.0 Hz, 1H), 3.71 (s, 3H);  $^{13}\text{C}$  (100 MHz, DMSO- $d_6$ )  $\delta$ : 165.9, 155.1, 150.8, 144.7, 133.9, 131.4, 129.0, 128.9, 128.3, 127.5, 123.2, 122.4, 121.2, 117.1, 116.1, 115.1, 112.7, 55.4, 43.5; HRMS (ESI): cacl. For  $\text{C}_{21}\text{H}_{17}\text{NO}_3$  [ $\text{M}+\text{Na}$ ] $^+$ : 354.1101, found 354.1094.

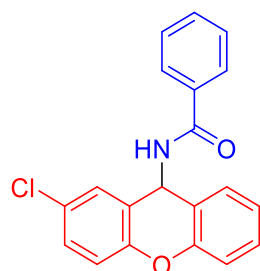

*N*-(2-Chloro-9*H*-xanthen-9-yl)benzamide (**3bd**): 140 mg, 84% yield; white solid, mp 217-218 °C;  $^1\text{H}$  NMR (400 MHz, DMSO- $d_6$ )  $\delta$ : 9.50 (d,  $J$  = 8.0 Hz, 1H), 7.92 (d,  $J$  = 4.0 Hz, 2H), 7.55 (t,  $J$  = 8.0 Hz, 1H), 7.47 (t,  $J$  = 8.0 Hz, 2H), 7.40 (t,  $J$  = 8.0 Hz, 3H), 7.35 (d,  $J$  = 8.0 Hz, 1H), 7.23 (d,  $J$  = 8.0 Hz, 1H), 7.17 (q,  $J$  = 8.0 Hz, 2H), 6.51 (d,  $J$  = 8.0 Hz, 1H);  $^{13}\text{C}$  NMR (100 MHz, DMSO- $d_6$ )  $\delta$ : 165.9, 150.4, 149.5, 133.7, 131.6, 129.1, 129.0, 128.9, 128.3, 128.2, 127.5, 126.8, 123.9, 123.8, 121.1, 118.2, 116.2, 43.1; HRMS (ESI): cacl. for  $\text{C}_{20}\text{H}_{14}\text{ClNO}_2$  [ $\text{M}+\text{Na}$ ] $^+$ : 358.0605, found 358.0597.

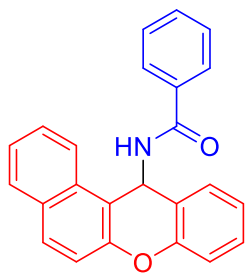

*N*-(12*H*-Benzo[*a*]xanthen-12-yl)benzamide (**3be**): 172 mg, 98% yield; white solid, mp 242-244 °C; <sup>1</sup>H NMR (400 MHz, DMSO-*d*<sub>6</sub>) δ: 9.37 (d, *J* = 8.0 Hz, 1H), 8.08 (d, *J* = 8.0 Hz, 1H), 7.97 (t, *J* = 8.0 Hz, 2H), 7.80 (d, *J* = 8.0 Hz, 2H), 7.64 (d, *J* = 8.0 Hz, 1H), 7.56 (t, *J* = 8.0 Hz, 1H), 7.47 (m, 3H), 7.38 (t, *J* = 8.0 Hz, 3H), 7.27 (d, *J* = 8.0 Hz, 1H), 7.19 (m, 2H); <sup>13</sup>C NMR (100 MHz, DMSO-*d*<sub>6</sub>) δ: 164.9, 150.2, 149.5, 133.7, 131.6, 131.4, 130.1, 130.0, 129.4, 129.0, 128.6, 128.2, 127.4, 127.3, 124.5, 124.0, 122.5, 122.3, 117.7, 116.1, 112.4, 40.9; HRMS (ESI): cacl'd. for C<sub>24</sub>H<sub>17</sub>NO<sub>2</sub> [M+Na]<sup>+</sup>: 374.1151, found 374.1143.

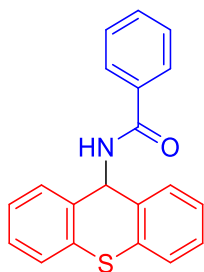

*N*-(9*H*-Thioxanthen-9-yl)benzamide (**3bf**): 68 mg, 43% yield (**condition I**); trace (**condition II**); yellow solid, mp 176-178 °C; <sup>1</sup>H NMR (400 MHz, DMSO-*d*<sub>6</sub>) δ: 9.59 (d, *J* = 8.0 Hz, 1H), 8.11 (d, *J* = 8.0 Hz, 2H), 7.61 (d, *J* = 8.0 Hz, 1H), 7.56 (s, 6H), 7.34 (m, 4H), 6.03 (d, *J* = 8.0 Hz, 1H); <sup>13</sup>C NMR (100 MHz, DMSO-*d*<sub>6</sub>) δ: 166.7, 136.0, 133.9, 131.7, 131.7, 128.4, 127.7, 127.3, 126.7, 125.7, 51.8; HRMS (ESI): cacl'd. for C<sub>20</sub>H<sub>15</sub>NOS [M+Na]<sup>+</sup>: 340.0767, found 340.0772.

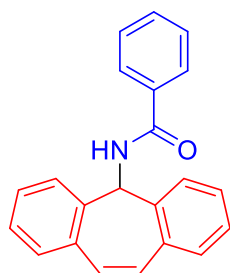

*N*-(5*H*-Dibenzo[*a,d*][7]annulen-5-yl)benzamide (**3bg**): 62 mg, 40% yield (**condition I**); trace (**condition II**); white solid, mp 232-233 °C; <sup>1</sup>H NMR (400 MHz, DMSO-*d*<sub>6</sub>) δ: 9.47 (s, 1H), 7.97 (d, *J* = 8.0 Hz, 2H), 7.74 (d, *J* = 8.0 Hz, 2H), 7.57 (t, *J* = 8.0 Hz, 1H), 7.51 (t, *J* = 8.0 Hz, 2H), 7.42 (t, *J* = 8.0 Hz, 4H), 7.29 (t, *J* = 8.0 Hz, 2H), 7.24 (s, 2H), 5.95 (d, *J* = 8.0 Hz, 1H); <sup>13</sup>C NMR (100 MHz, DMSO-*d*<sub>6</sub>) δ: 166.2, 138.6, 134.4, 133.5, 131.4, 131.3, 128.3, 128.2, 128.1, 127.7, 126.5, 124.4, 53.3; HRMS (ESI): cacl'd. for C<sub>22</sub>H<sub>17</sub>NO [M+Na]<sup>+</sup>: 334.1202, found 334.1210.



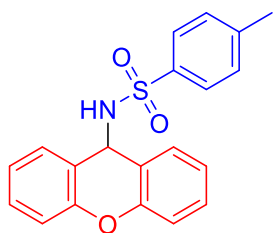

4-Methyl-*N*-(9*H*-xanthen-9-yl)benzenesulfonamide (**3bh**): 109 mg, 62% yield (**condition I**); trace (**condition II**); 1.27 g, 72% yield (gram scale); white solid, mp 232-233 °C;  $^1\text{H}$  NMR (400 MHz, DMSO- $d_6$ )  $\delta$ : 7.41 (t,  $J$  = 8.0 Hz, 2H), 7.34 (d,  $J$  = 4.0 Hz, 2H), 7.23 (d,  $J$  = 8.0 Hz, 2H), 7.15 (t,  $J$  = 8.0 Hz, 2H), 7.06 (d,  $J$  = 8.0 Hz, 2H), 6.98 (d,  $J$  = 8.0 Hz, 2H), 6.06 (s, 1H), 2.36 (s, 3H);  $^{13}\text{C}$  NMR (100 MHz, DMSO- $d_6$ )  $\delta$ : 152.2, 144.8, 132.3, 131.4, 130.6, 129.2, 129.0, 123.2, 116.1, 113.9, 65.1, 21.1. These data are in accordance with the literature.<sup>7</sup>

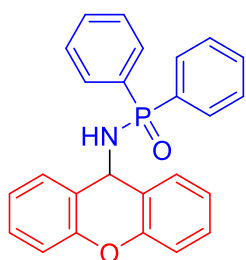

*P,P*-Diphenyl-*N*-(9*H*-xanthen-9-yl)phosphinic amide (**3bi**): 60 mg, 30% yield; white solid, mp 256-258 °C;  $^1\text{H}$  NMR (400 MHz,  $\text{CDCl}_3$ )  $\delta$ : 7.91 (q, 4H), 7.61 (d,  $J$  = 8.0 Hz, 2H), 7.51 (t,  $J$  = 8.0 Hz, 2H), 7.46 (m, 4H), 7.28 (d,  $J$  = 8.0 Hz, 2H), 7.09 (t,  $J$  = 8.0 Hz, 4H), 5.59 (t,  $J$  = 12.0 Hz, 1H), 3.41 (t,  $J$  = 8.0 Hz, 1H);  $^{13}\text{C}$  NMR (100 MHz,  $\text{CDCl}_3$ )  $\delta$ : 151.5, 133.2, 132.3, 132.2, 132.02, 131.99, 131.9, 130.2, 128.9, 128.6, 128.5, 123.5, 123.0, 122.9, 116.5, 46.6; HRMS (ESI): cacl. for  $\text{C}_{25}\text{H}_{20}\text{NO}_2\text{P}$  [ $\text{M}+\text{Na}$ ] $^+$ : 420.1124, found 420.1132.

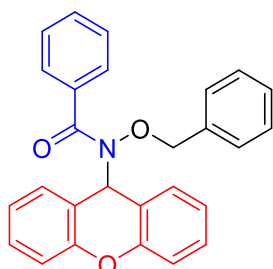

*N*-(Benzyloxy)-*N*-(9*H*-xanthen-9-yl)benzamide (**4aa**): 53 mg, 26% yield (**condition I**, reaction time 0.5 h); white solid, mp 136-140 °C;  $^1\text{H}$  NMR (400 MHz, DMSO- $d_6$ )  $\delta$ : 7.57 (m, 5H), 7.46 (m, 4H), 7.26 (t,  $J$  = 8.0 Hz, 4H), 7.18 (m, 3H), 6.94 (s, 1H), 6.55 (d,  $J$  = 8.0 Hz, 2H), 4.00 (s, 2H);  $^{13}\text{C}$  NMR (100 MHz, DMSO- $d_6$ )  $\delta$ : 169.9, 152.2, 134.4, 133.5, 130.6, 129.9, 129.4, 128.9, 128.6, 128.3, 128.2, 127.5, 123.8, 118.6, 116.4, 78.0, 52.9; HRMS (ESI): cacl. for  $\text{C}_{27}\text{H}_{21}\text{NO}_3$  [ $\text{M}+\text{Na}$ ] $^+$ : 430.1414, found 430.1420.

## 8. References

1. D. Shimbo, T. Maruyama, N. Tada and A. Itoh, *N*-Alkenylation of hydroxamic acid derivatives with ethynyl benziodoxolone to synthesize cisenamides through vinyl benziodoxolones, *Org. Biomol. Chem.*, 2021, **19**, 2442-2447.
2. Z. Zhang, Y. Yu and L. S. Liebeskind, *N*-Amidation by Copper-Mediated Cross-Coupling of Organostannanes or Boronic Acids with *O*-Acetyl Hydroxamic Acids, *Org. Lett.*, 2008, **10**, 3005-3008.
3. E. Böß, T. Hillringhaus, J. Nitsch and M. Klussmann, Lewis acid-catalysed one pot synthesis of substituted xanthenes, *Org. Biomol. Chem.*, 2011, **9**, 1744-1748.
4. M. Bhanuchandra, H. Yorimitsu and A. Osuka, Synthesis of Spirocyclic Diarylfluorenes by One-Pot Twofold SNAr Reactions of Diaryl Sulfones with Diarylmethanes, *Org. Lett.*, 2016, **18**, 384-387.
5. C. Schmuck and W. Wienand, The First Efficient Synthesis and Optical Resolution of Monosubstituted Cyclotribenzylenes, *Synthesis*, 2002, **5**, 655-663.
6. Y. Li, Y. Li, Y. Li, C. Chen, F. Ying, Y. Dong and D. Liang, Metal-free cross-dehydrogenative C-N coupling of azoles with xanthenes and related activated arylmethylenes, *Syn. Commun.*, 2019, **49**, 2053-2065.
7. K. R. Watterson, S. V. F. Hansen, B. D. Hudson, E. Alvarez-Curto, S. Z. Raihan, C. M. G. Azevedo, G. Martin, J. Dunlop, S. J. Yarwood, T. Ulven and G. Milligan, Probe-Dependent Negative Allosteric Modulators of the Long-Chain Free Fatty Acid Receptor FFA4, *Mol. Pharmacol.*, 2017, **91**, 630-641.
8. L. Luo, B.-Z. Jia, X.-Q. Wei, Z.-L. Xiao, H. Wang, Y.-M. Sun, Y.-D. Shen, H.-T. Lei and Z.-L. Xu, Development of an inner filter effect-based fluorescence immunoassay for the detection of acrylamide using 9-xanthidrol derivatization, *Sensor Actuat. B-Chem.*, 2021, **332**, 129561.

# NMR spectra

## 3aa <sup>1</sup>H NMR

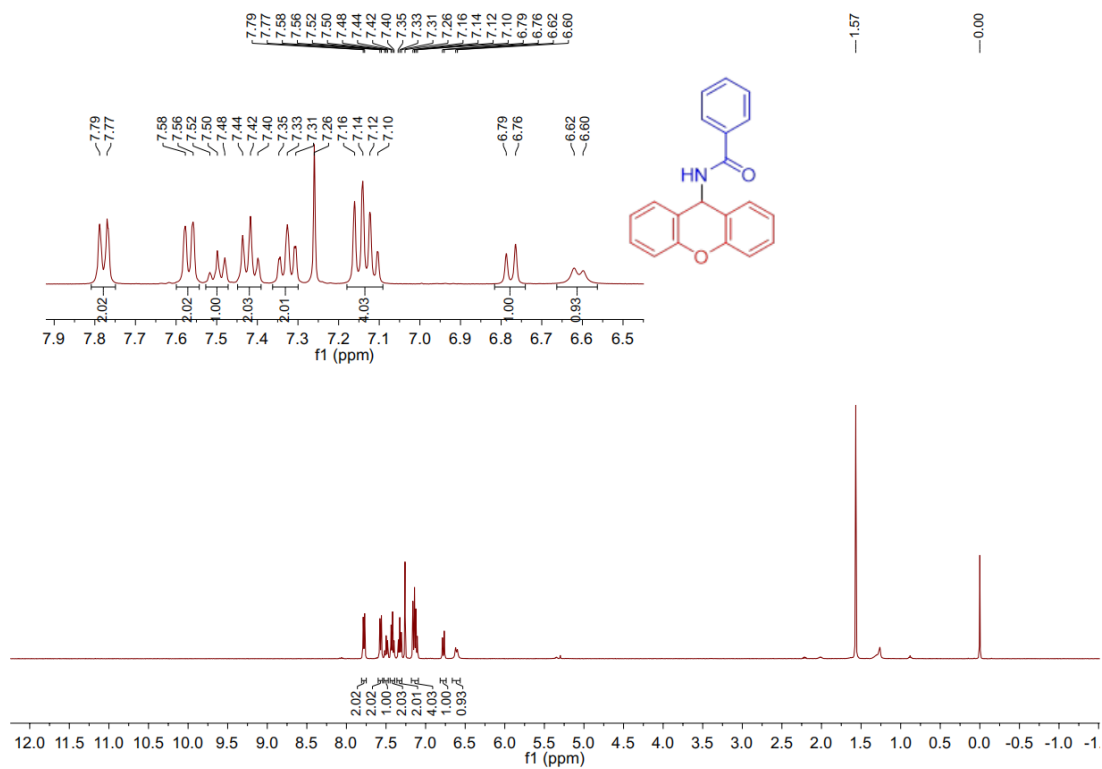

## 3aa <sup>13</sup>C NMR

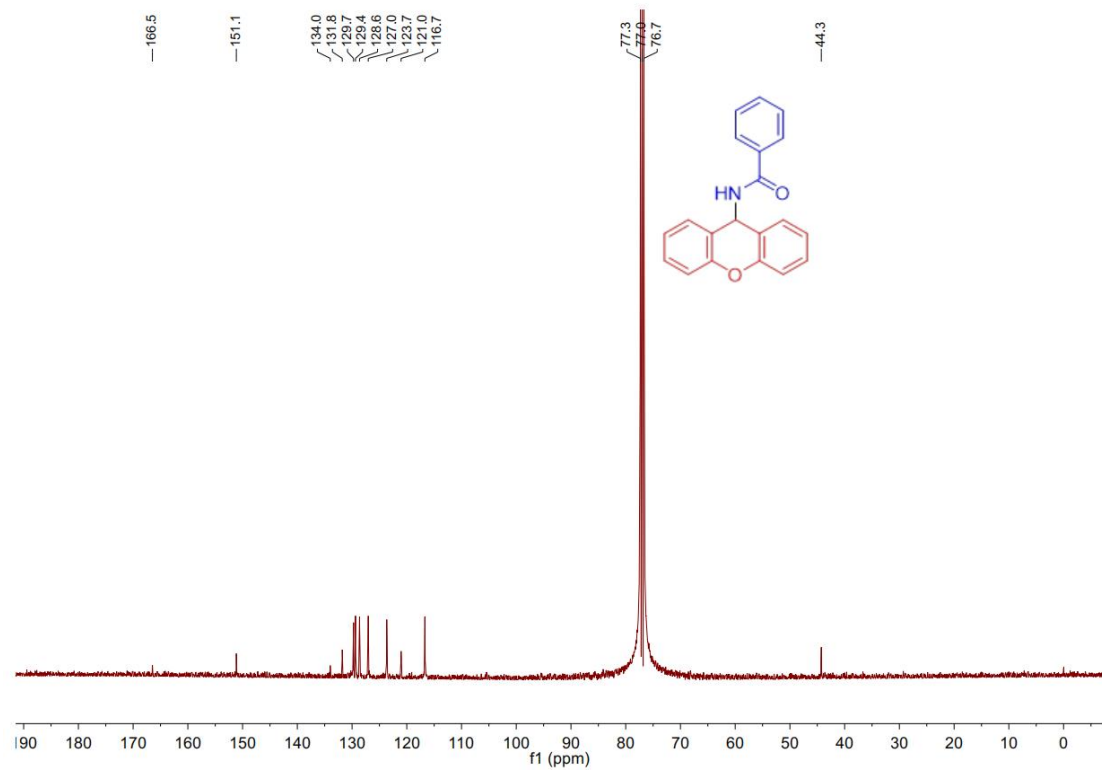

### 3ab <sup>1</sup>H NMR

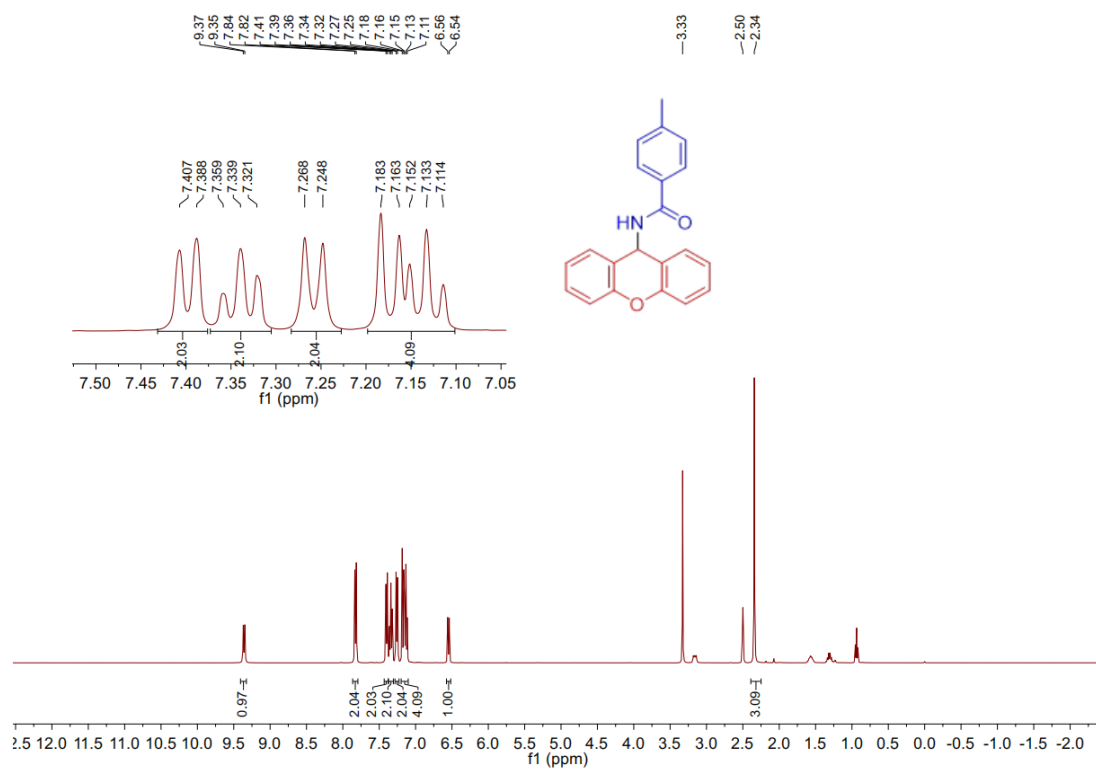

### 3ab <sup>13</sup>C NMR

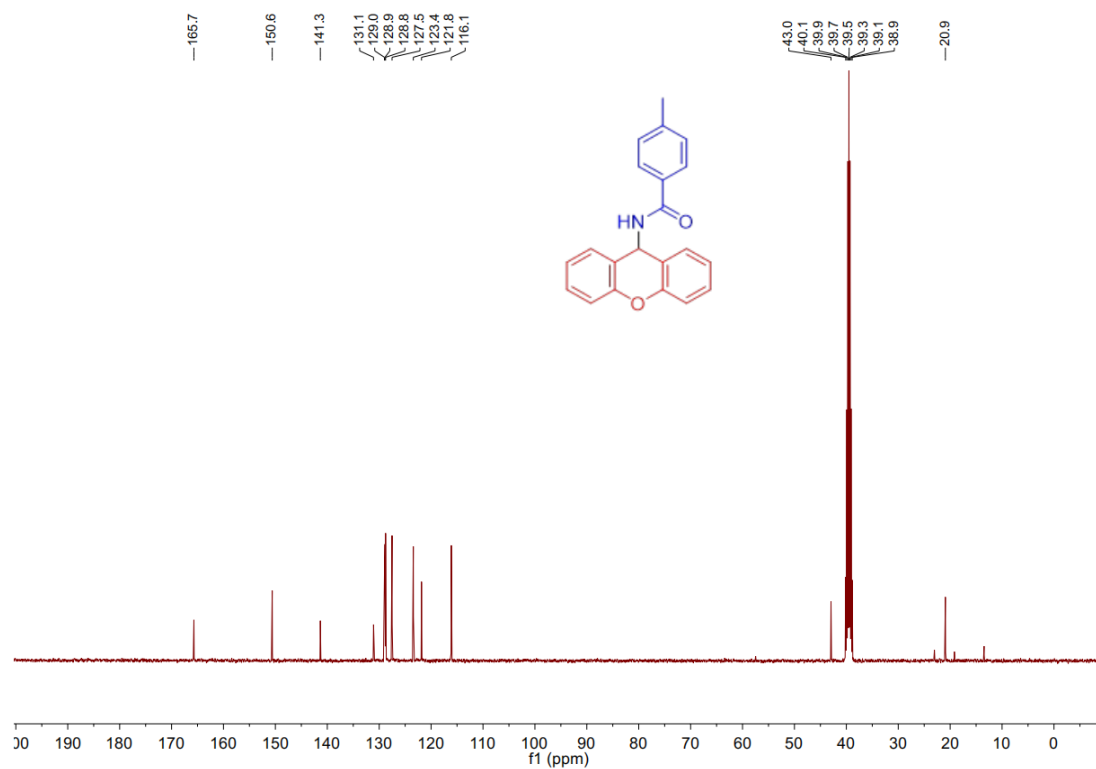

### 3ac <sup>1</sup>H NMR

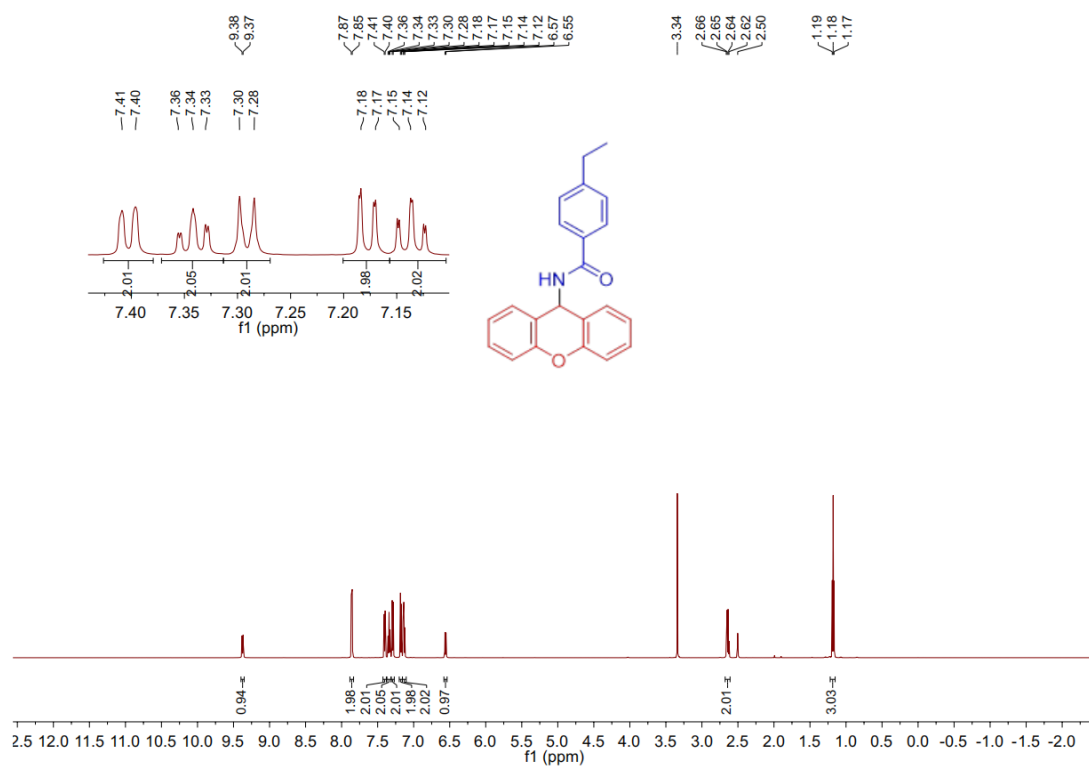

### 3ac <sup>13</sup>C NMR

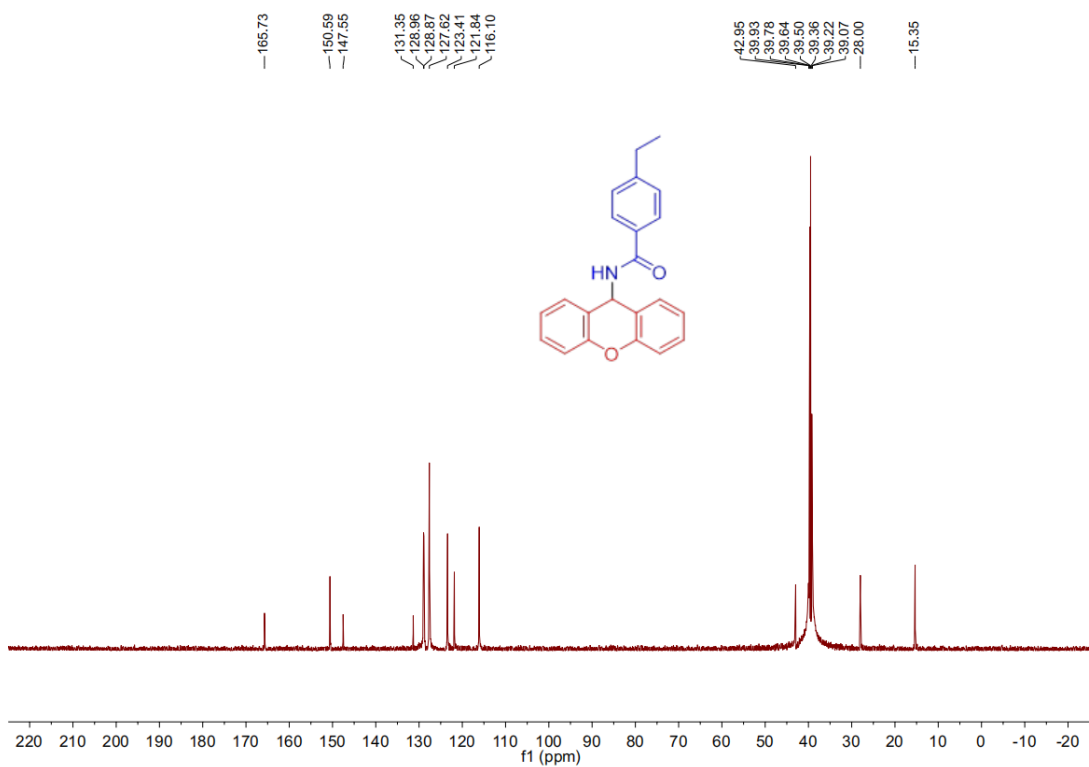

### 3ad <sup>1</sup>H NMR

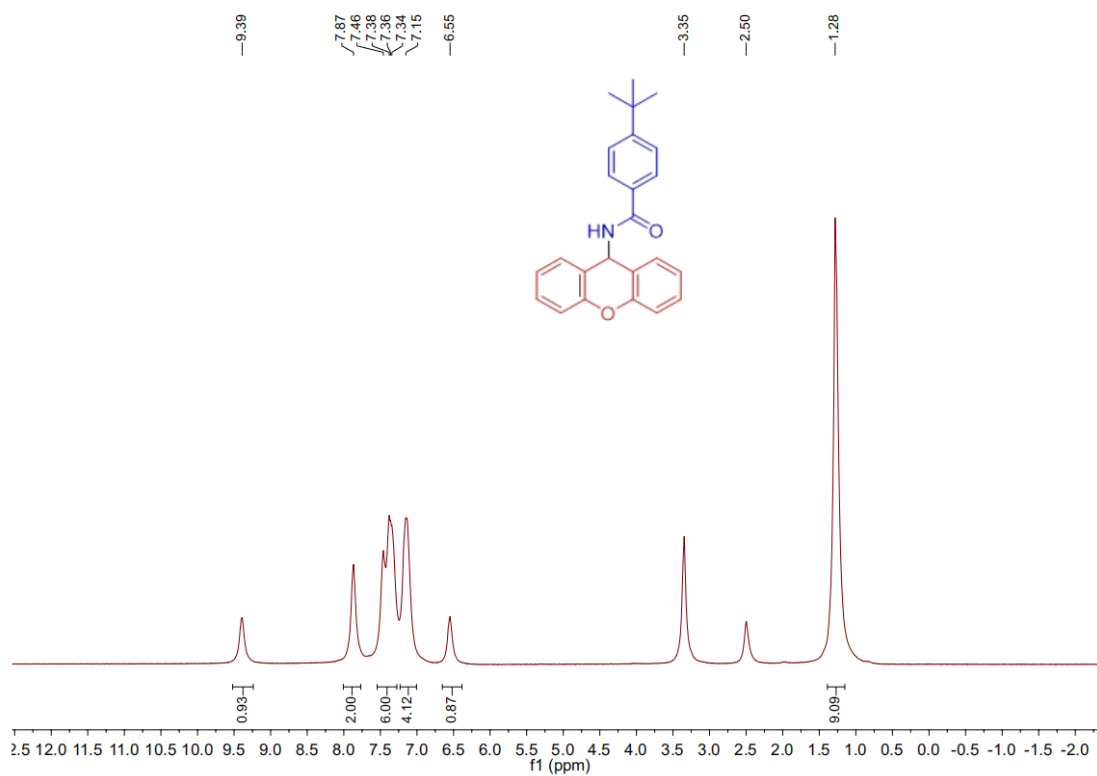

### 3ad <sup>13</sup>C NMR

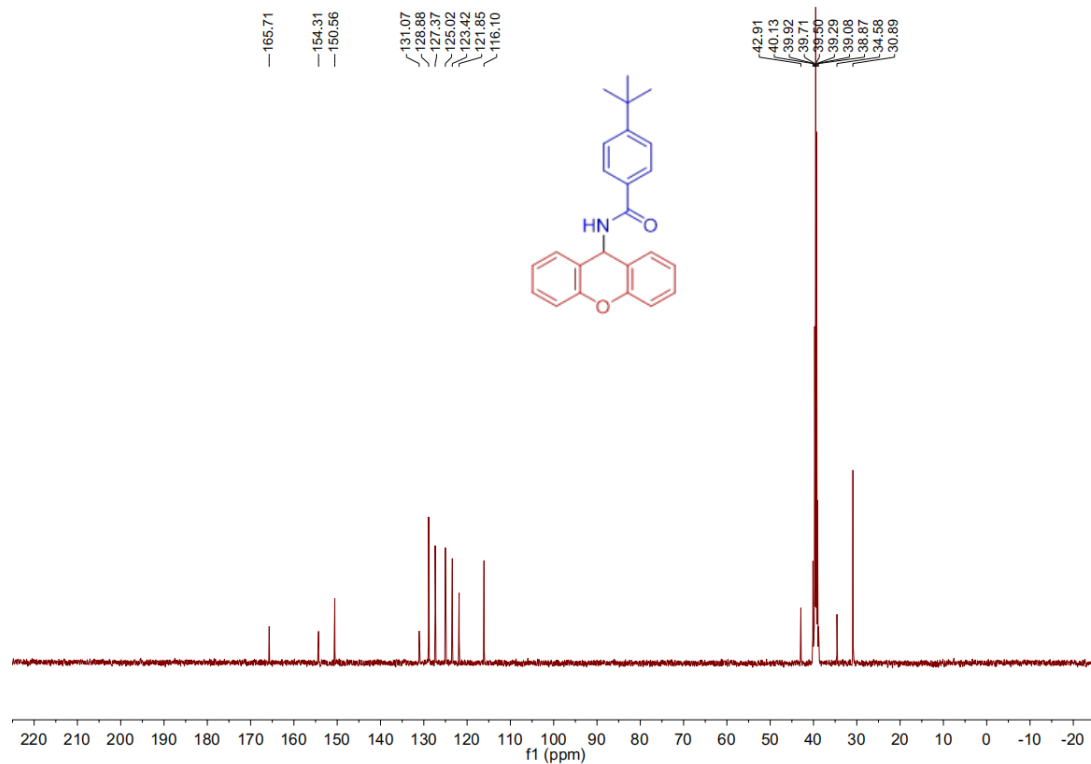

### 3ae <sup>1</sup>H NMR

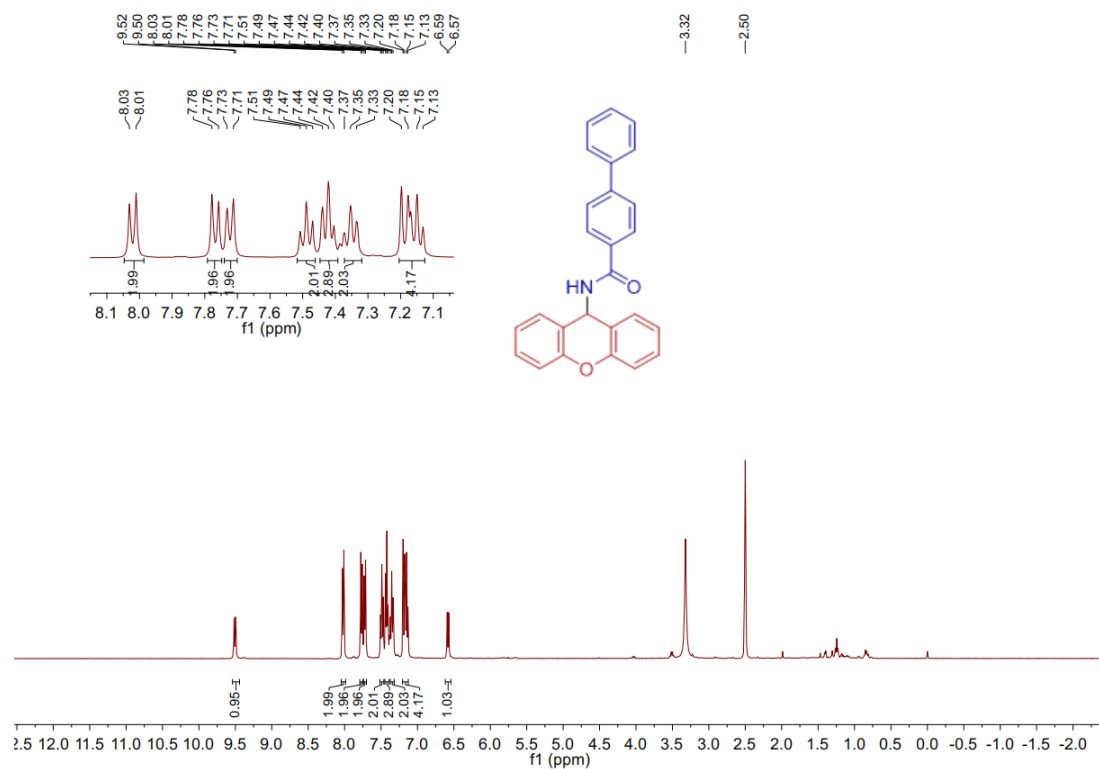

### 3ae <sup>13</sup>C NMR

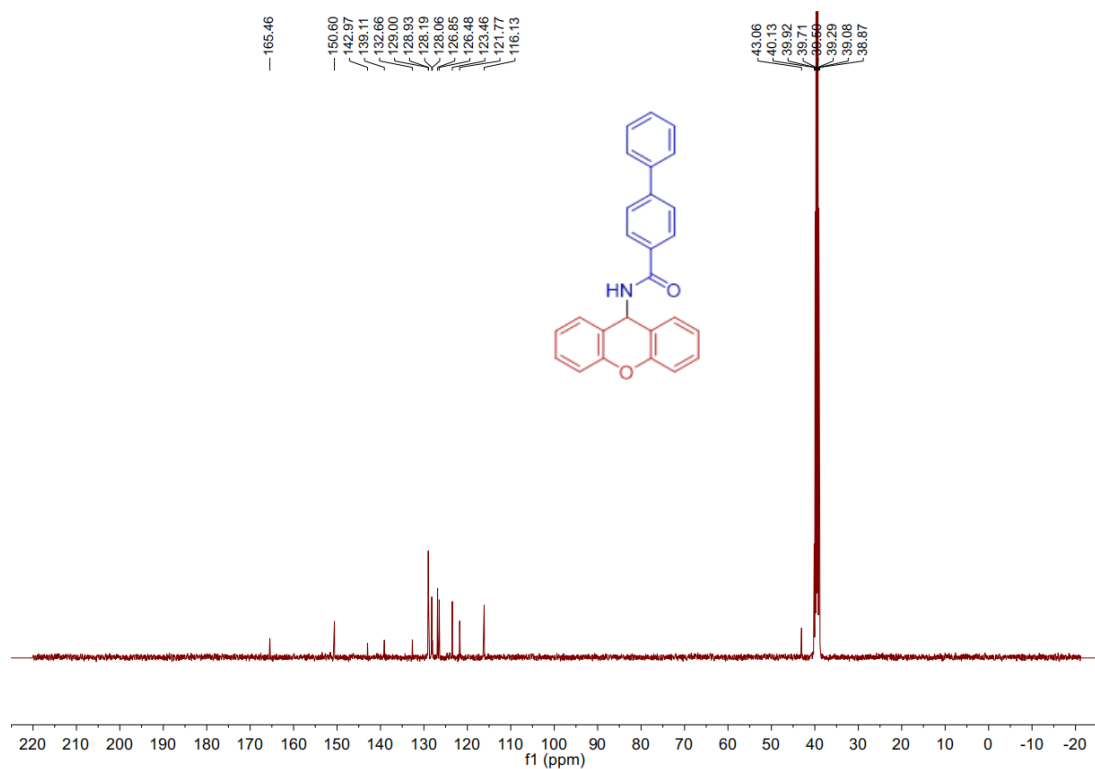

### 3af <sup>1</sup>H NMR

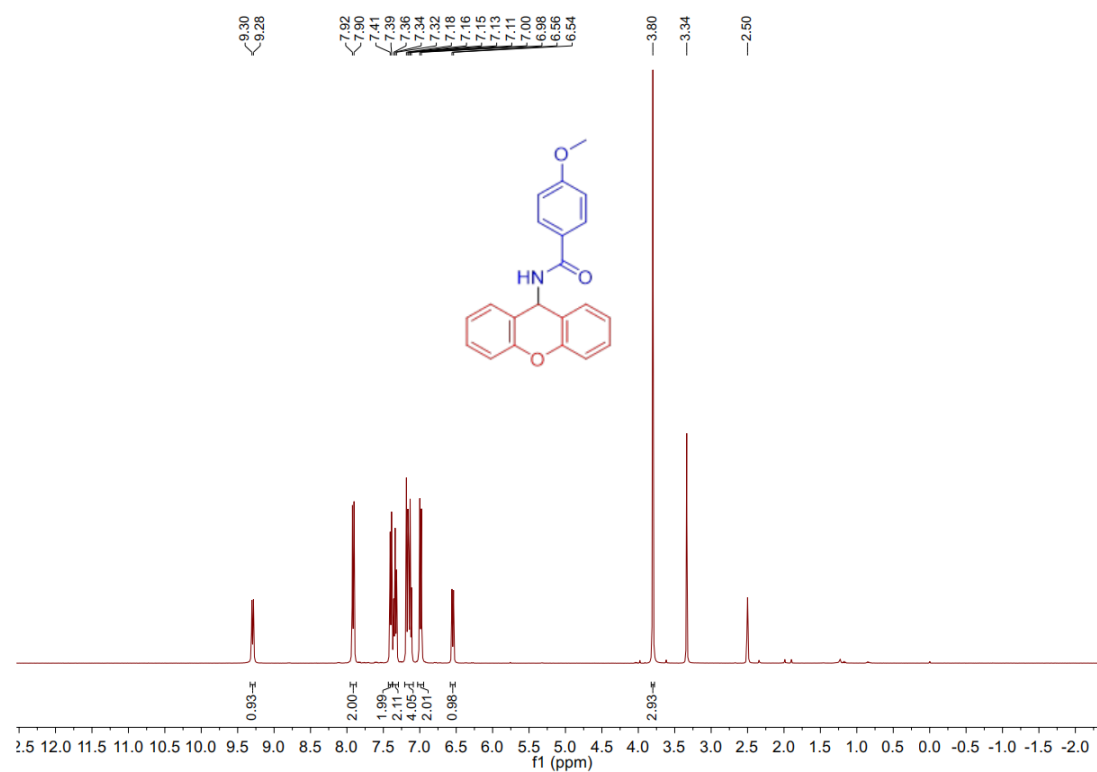

### 3af <sup>13</sup>C NMR

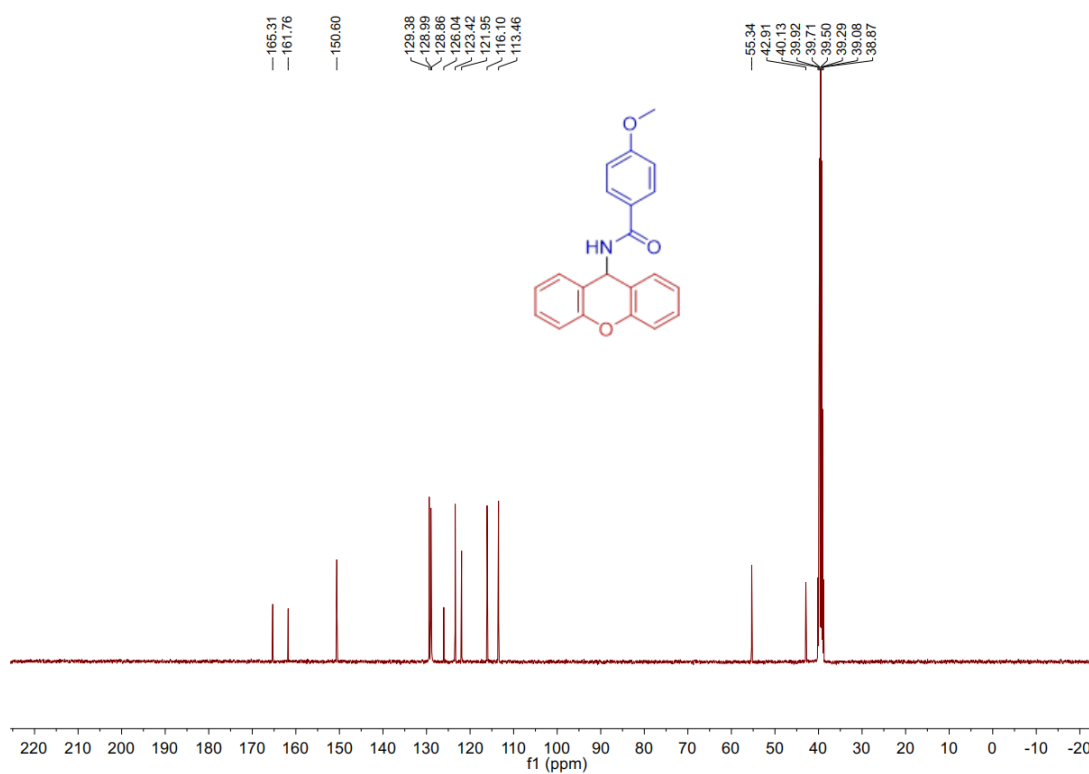



### 3ag <sup>1</sup>H NMR

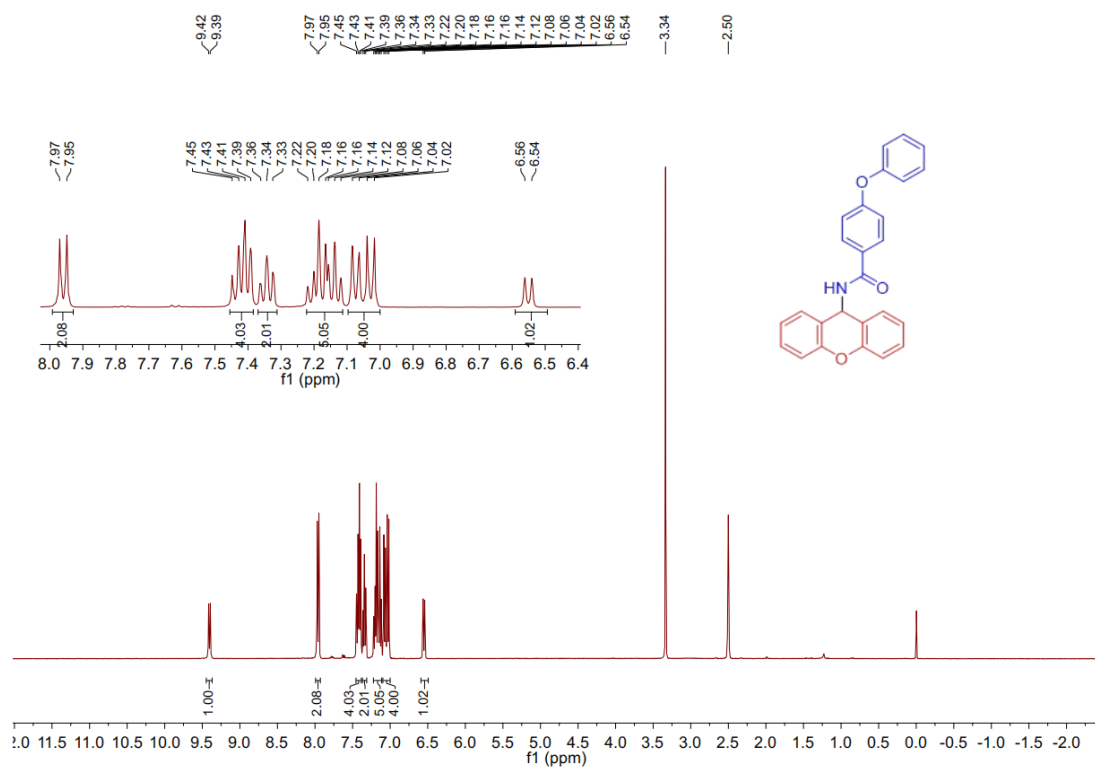

### 3ag <sup>13</sup>C NMR

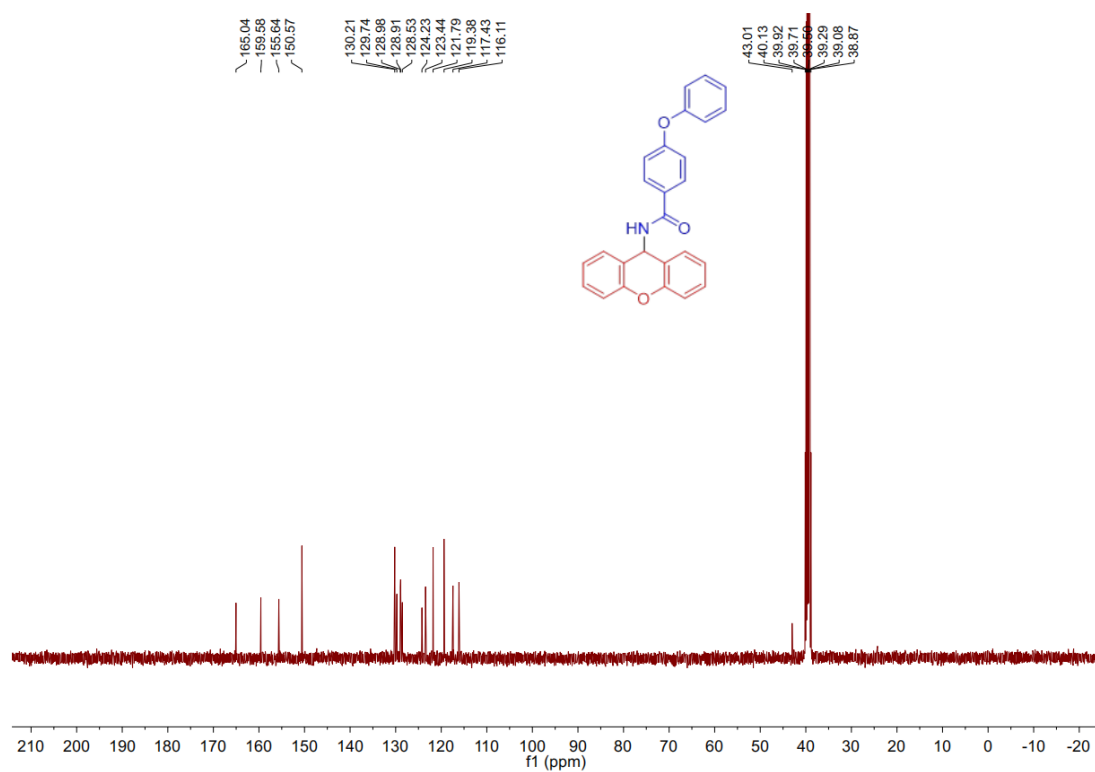

### 3ah <sup>1</sup>H NMR

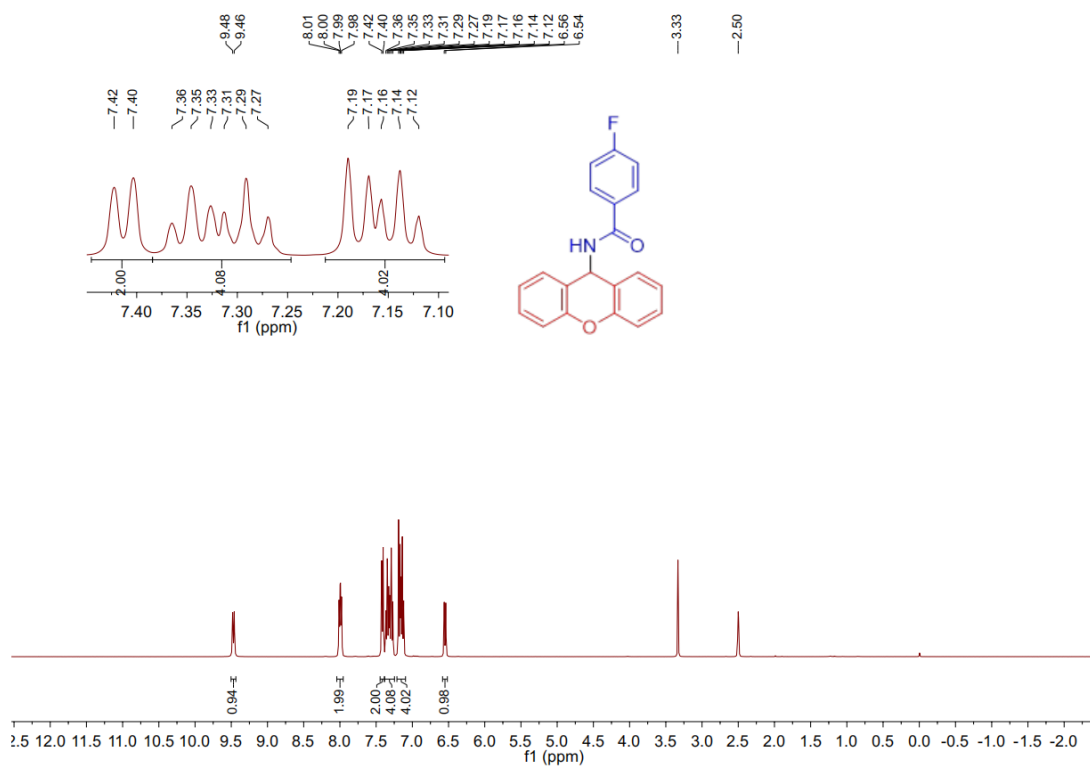

### 3ah <sup>13</sup>C NMR

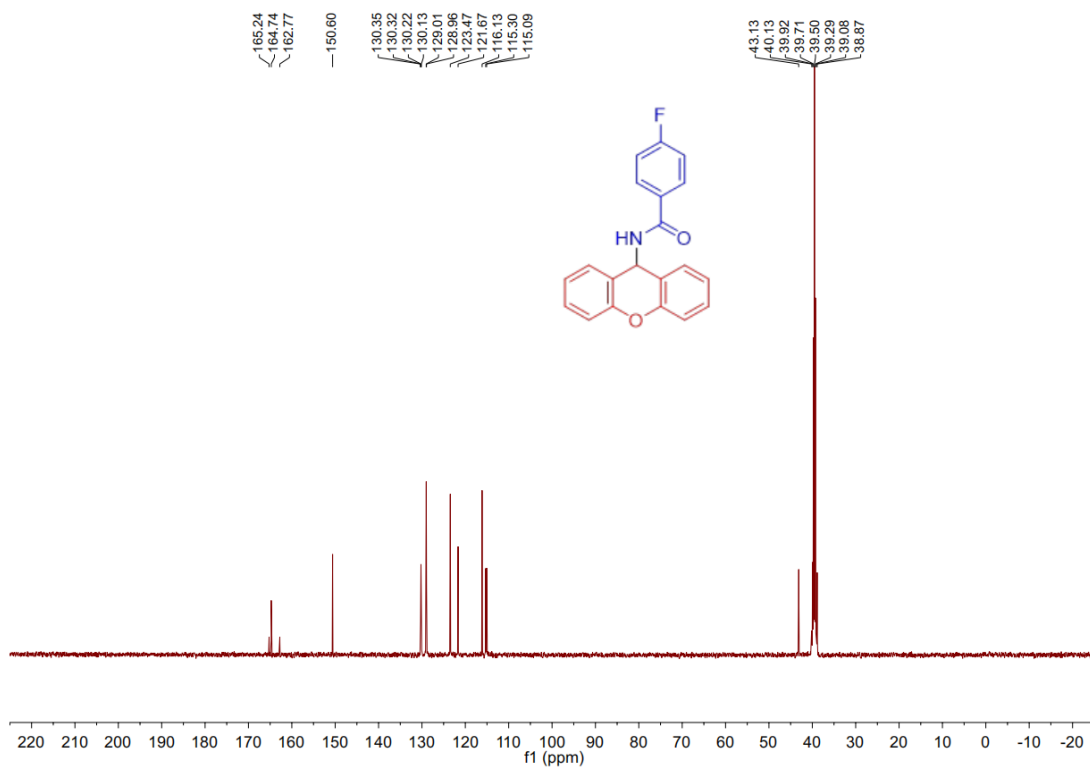

3ai <sup>1</sup>H NMR

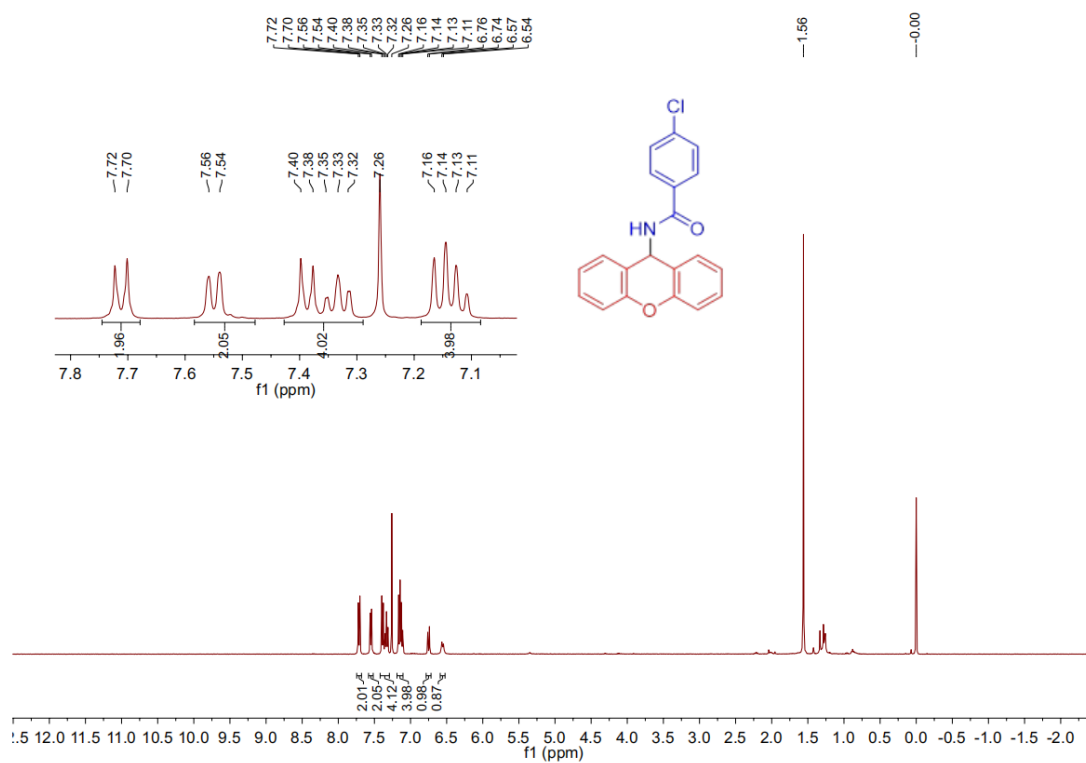

3ai <sup>13</sup>C NMR

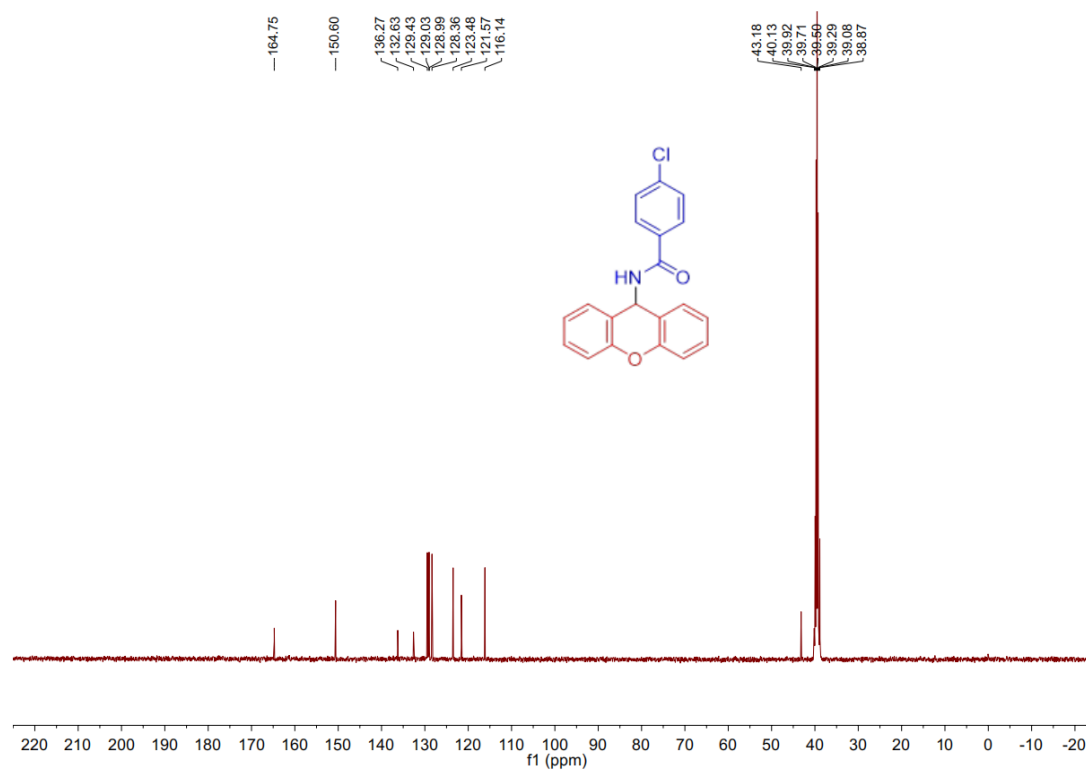

### 3aj <sup>1</sup>H NMR

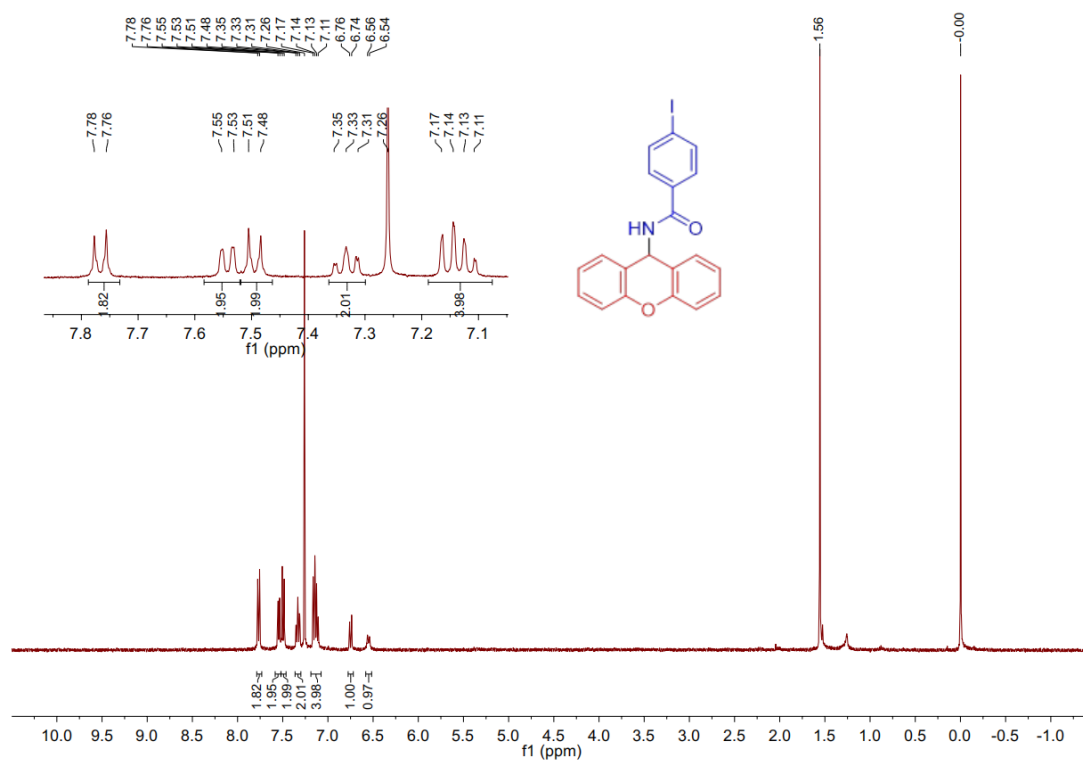

### 3aj <sup>13</sup>C NMR

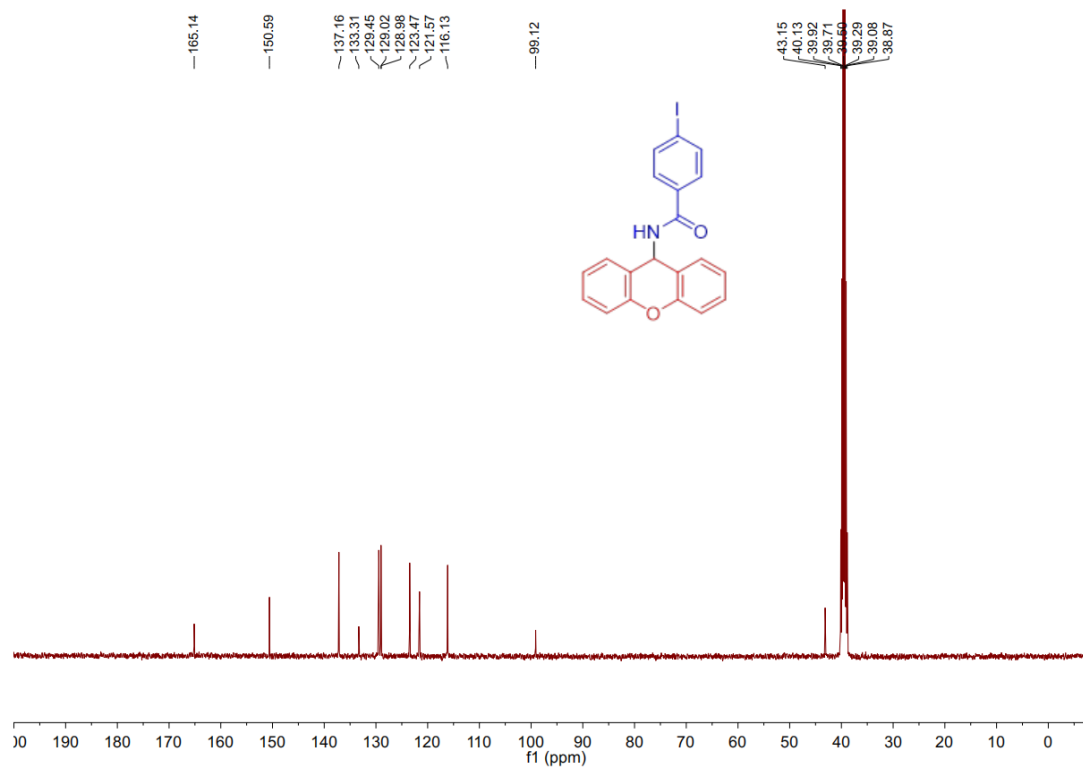

### 3ak <sup>1</sup>H NMR

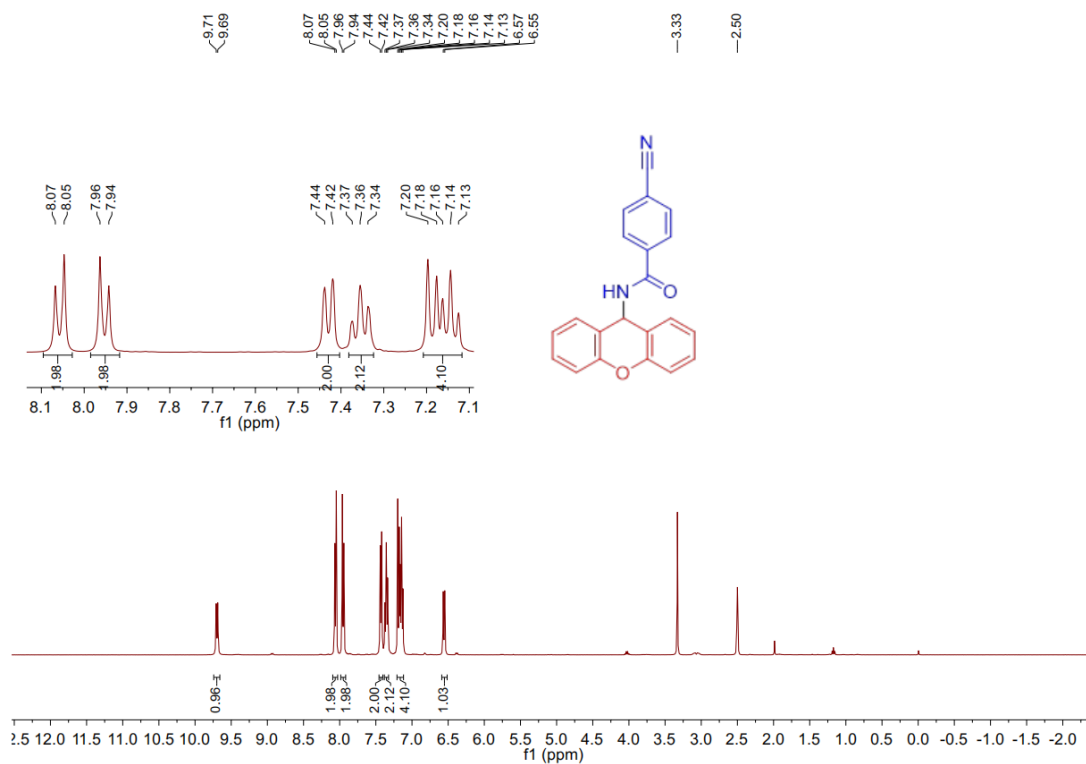

### 3ak <sup>13</sup>C NMR

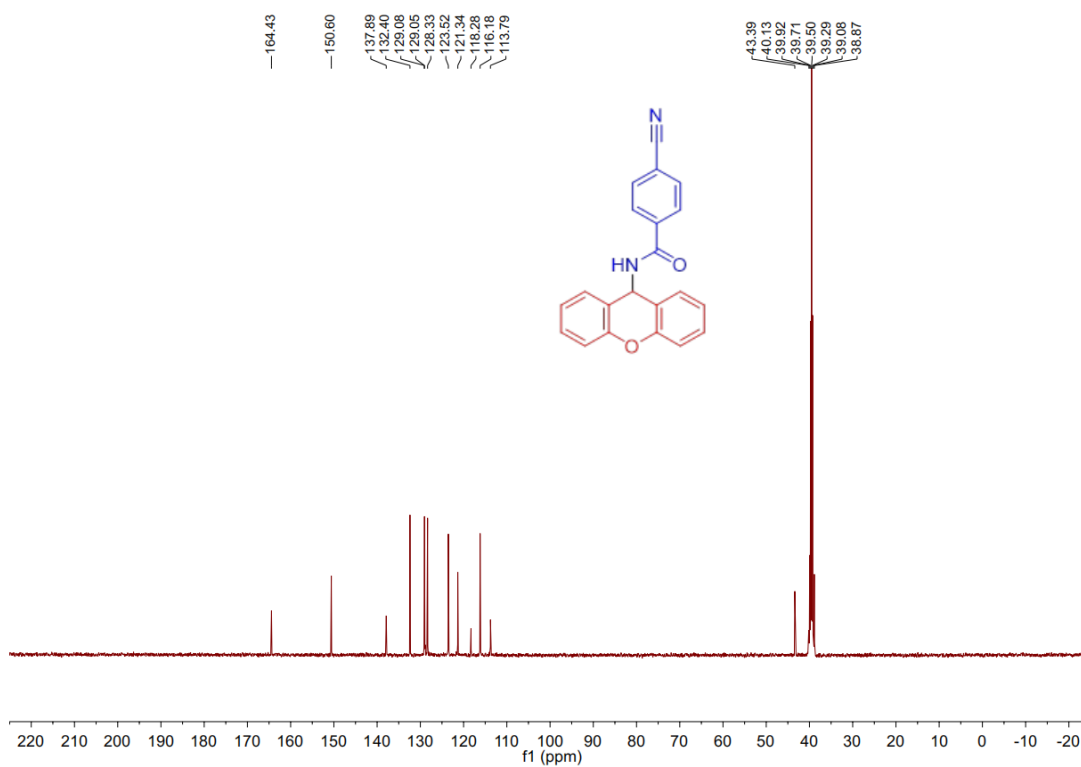

3a1 <sup>1</sup>H NMR

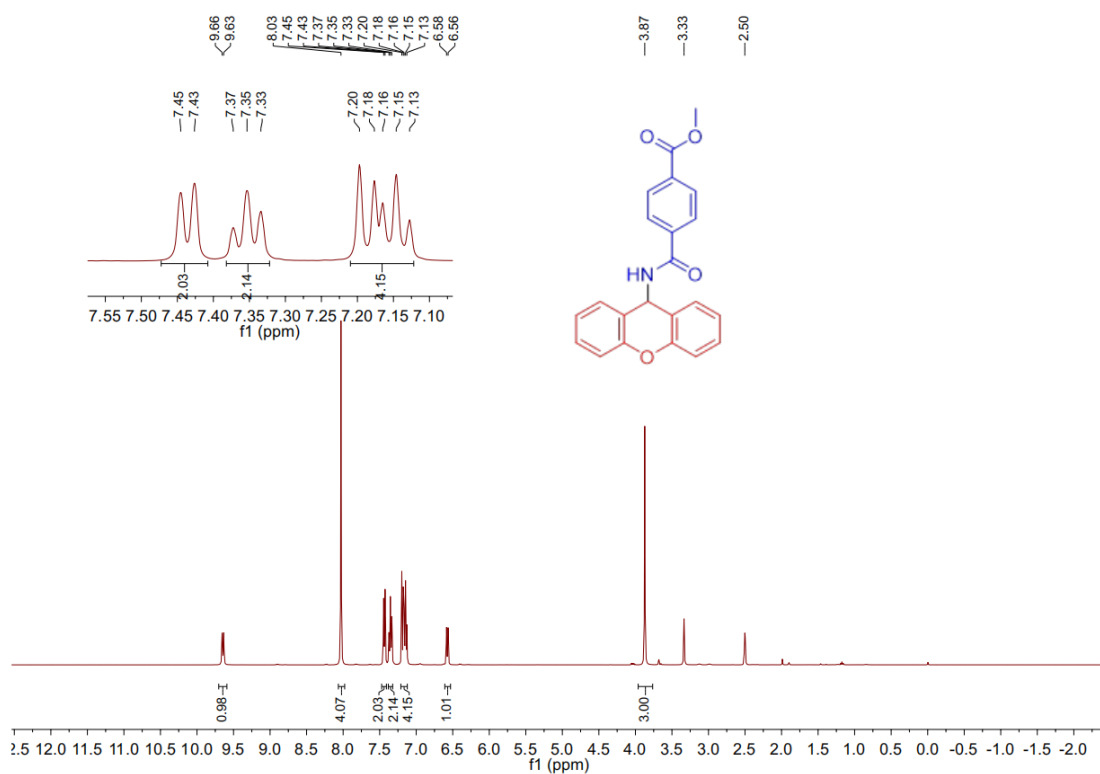

3a1 <sup>13</sup>C NMR

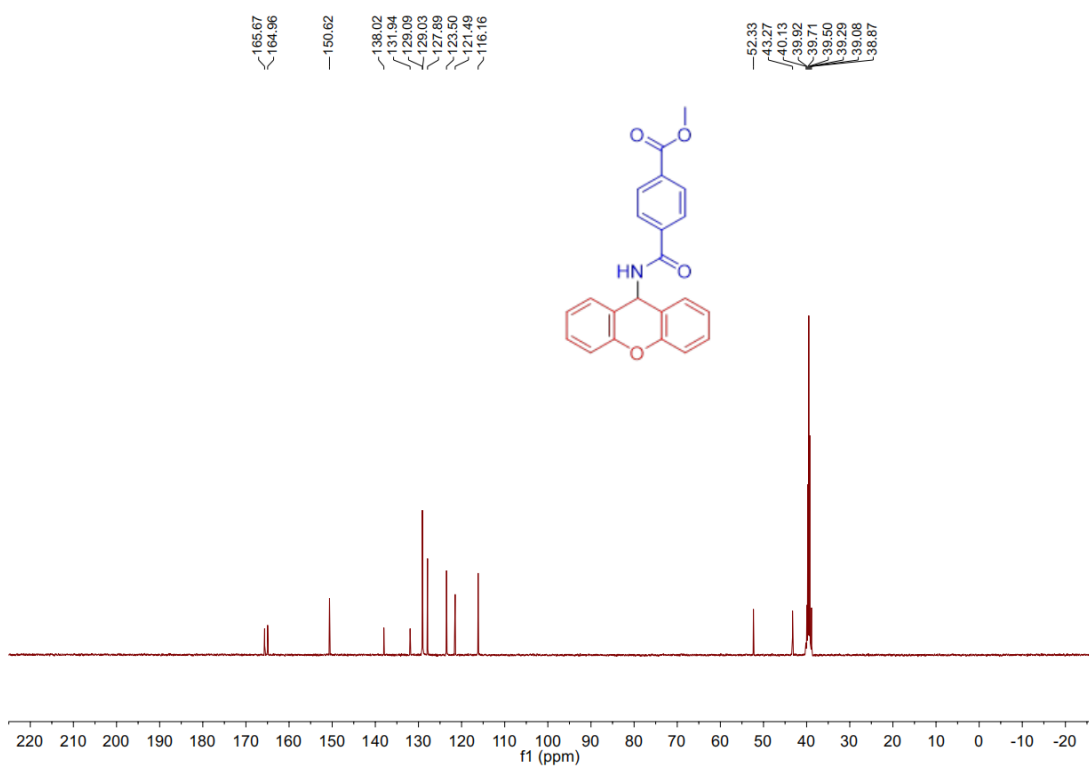

### 3am <sup>1</sup>H NMR

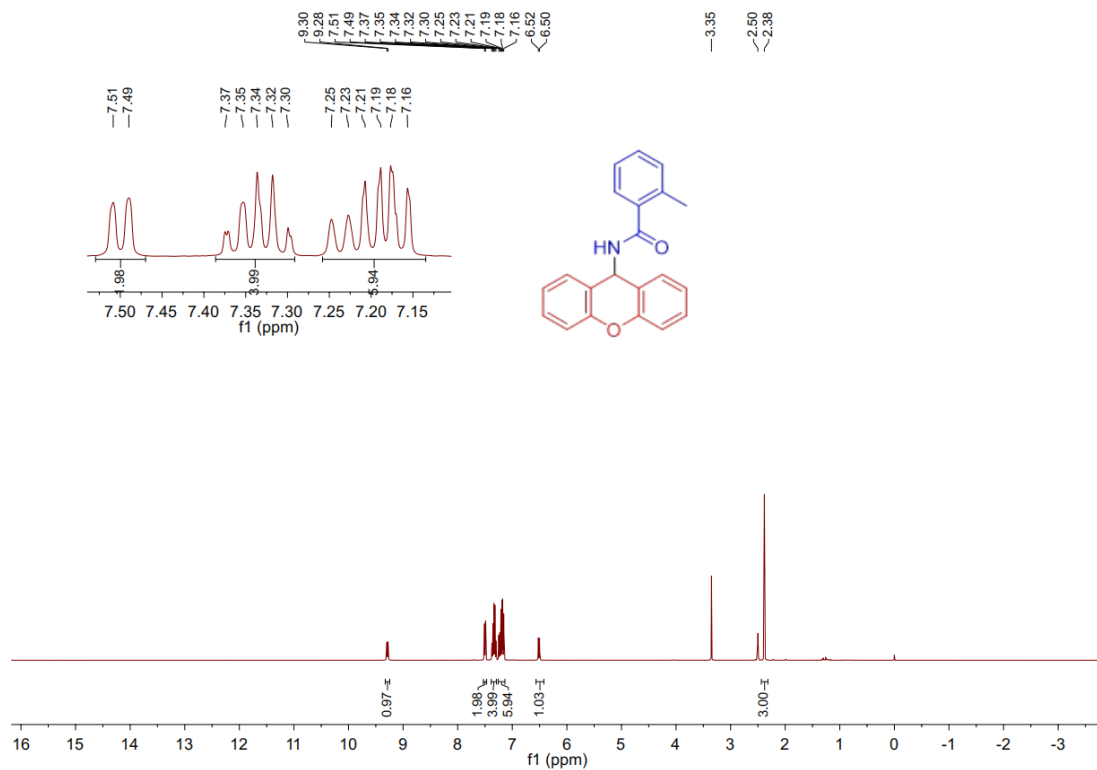

### 3am <sup>13</sup>C NMR

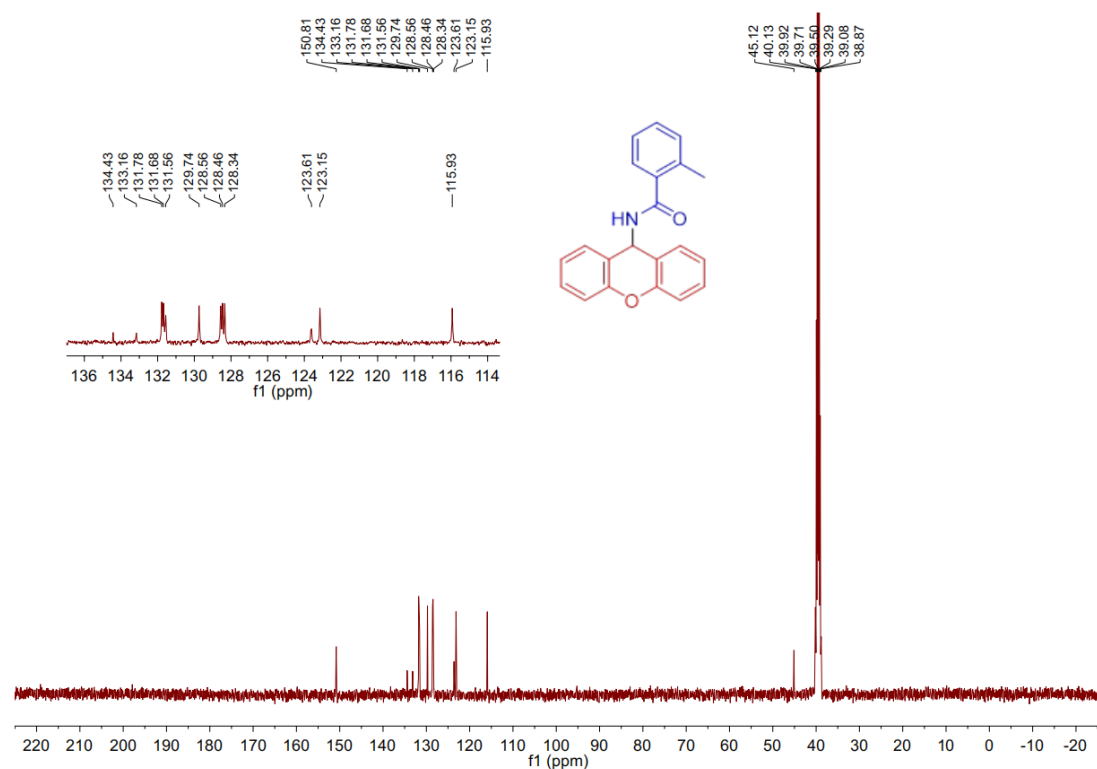

### 3an <sup>1</sup>H NMR

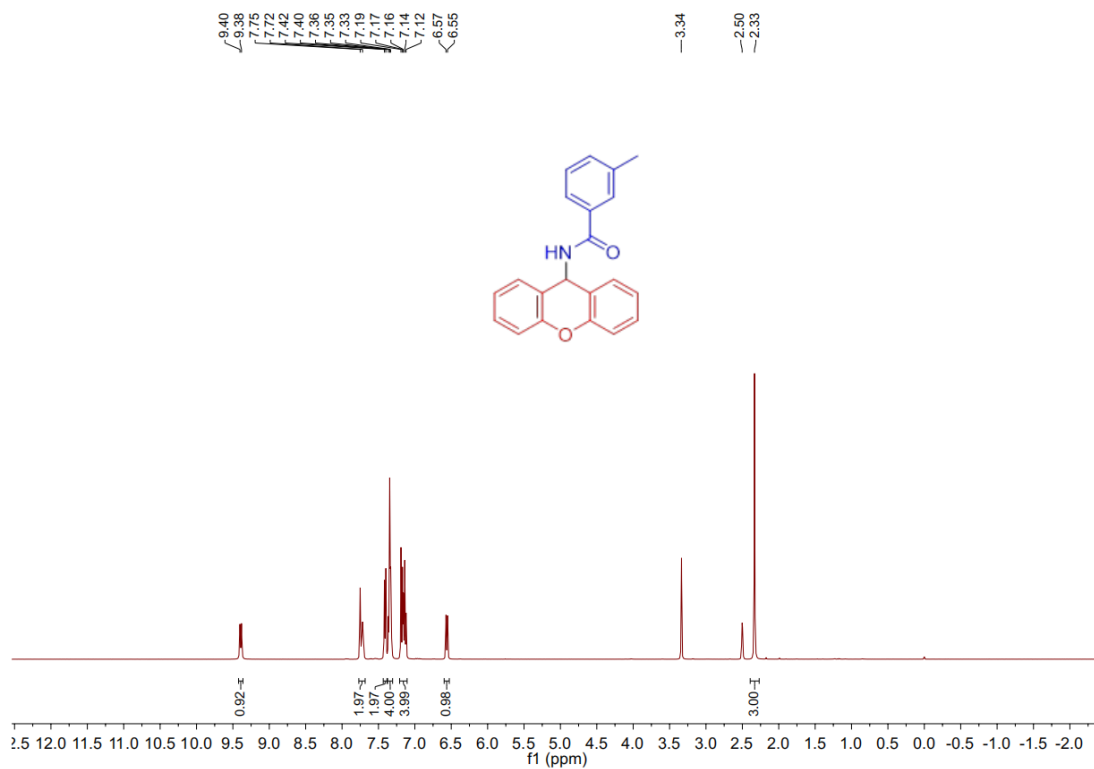

### 3an <sup>13</sup>C NMR

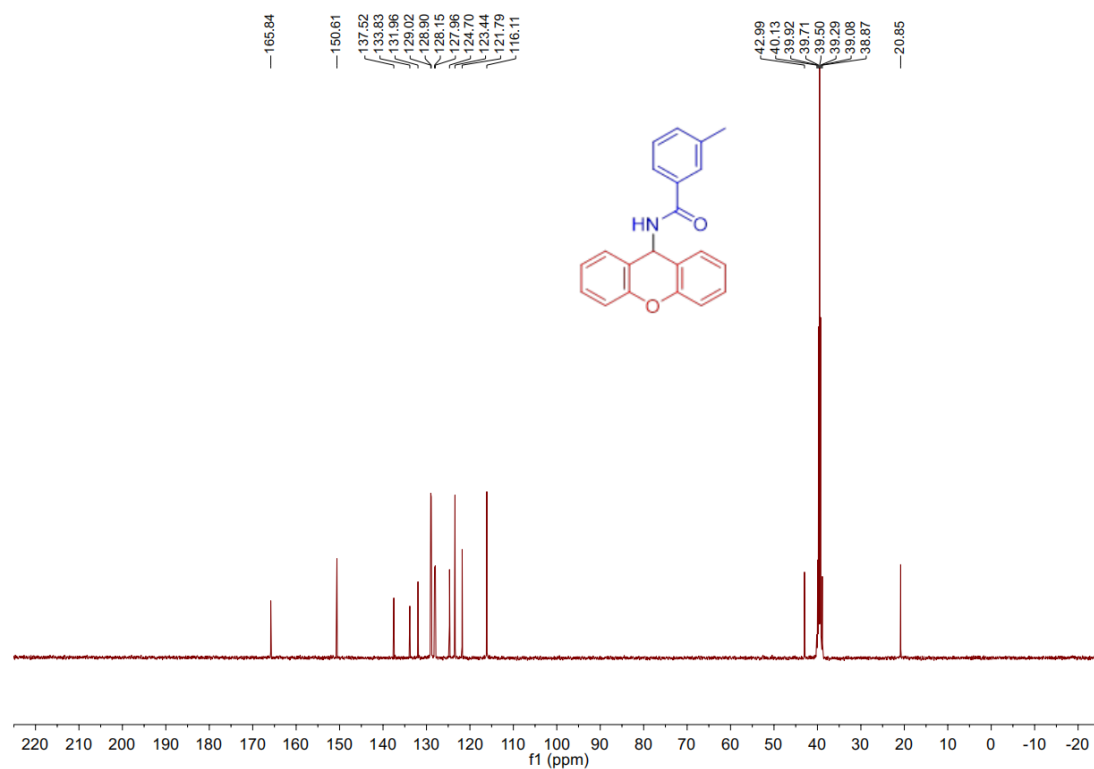



### 3ao <sup>1</sup>H NMR

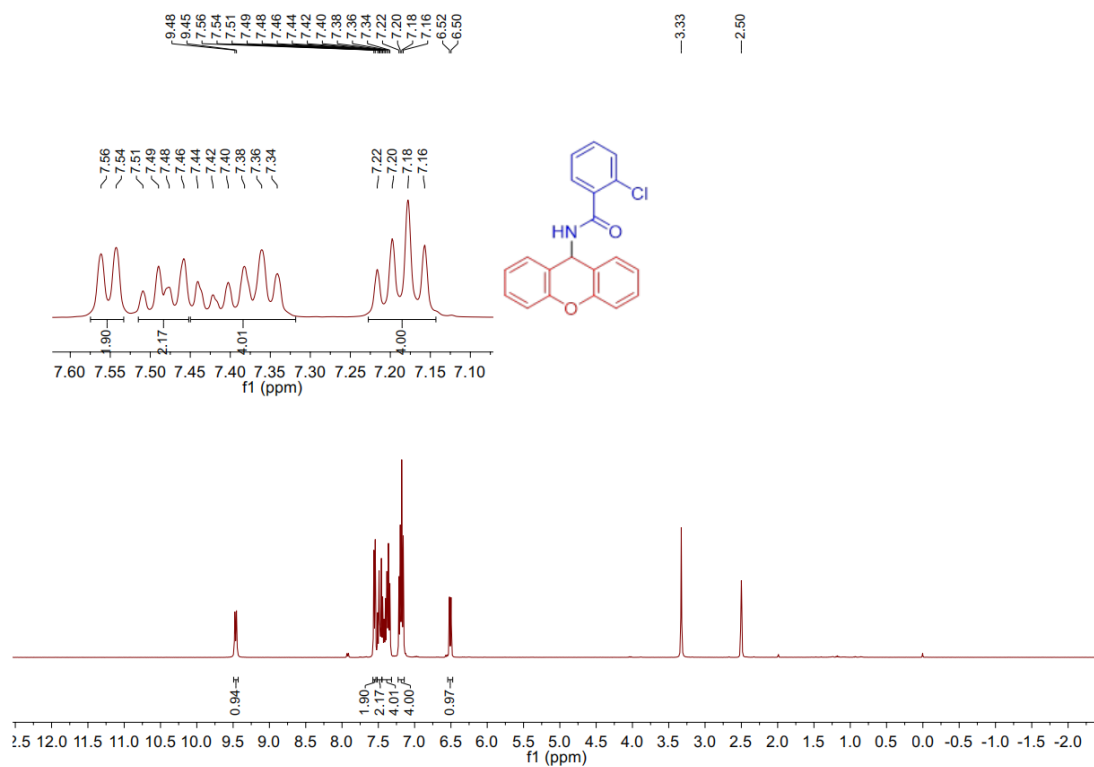

### 3ao <sup>13</sup>C NMR

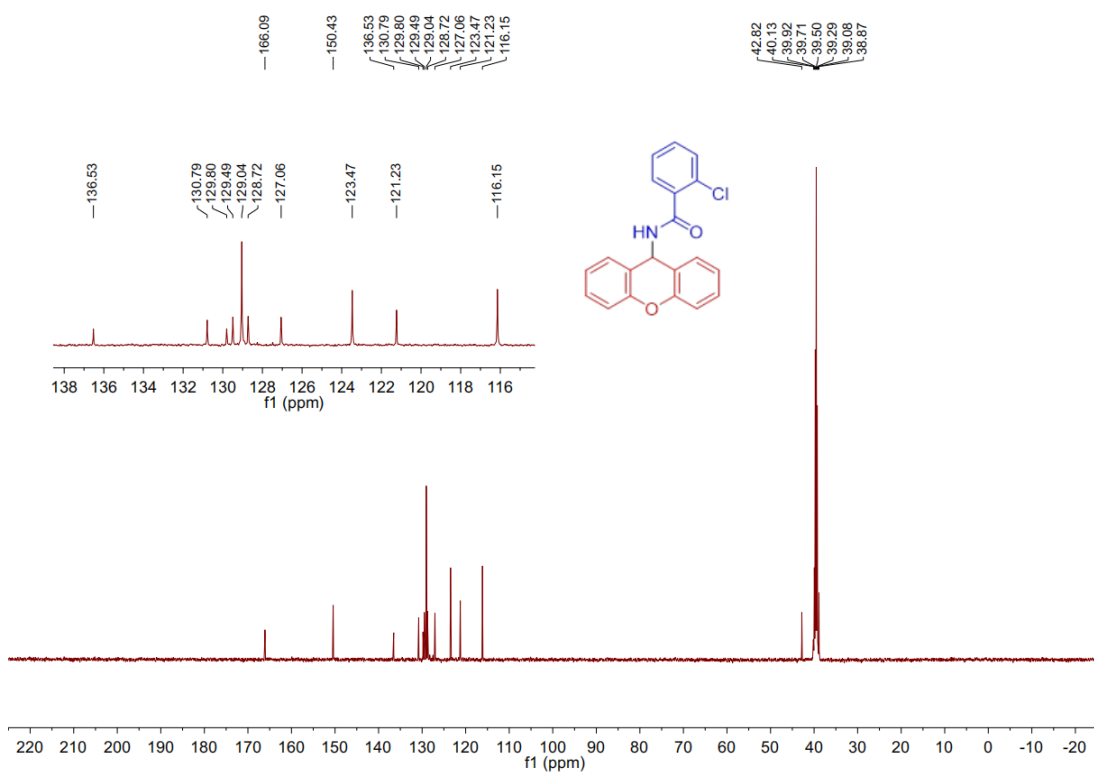

### 3ap <sup>1</sup>H NMR

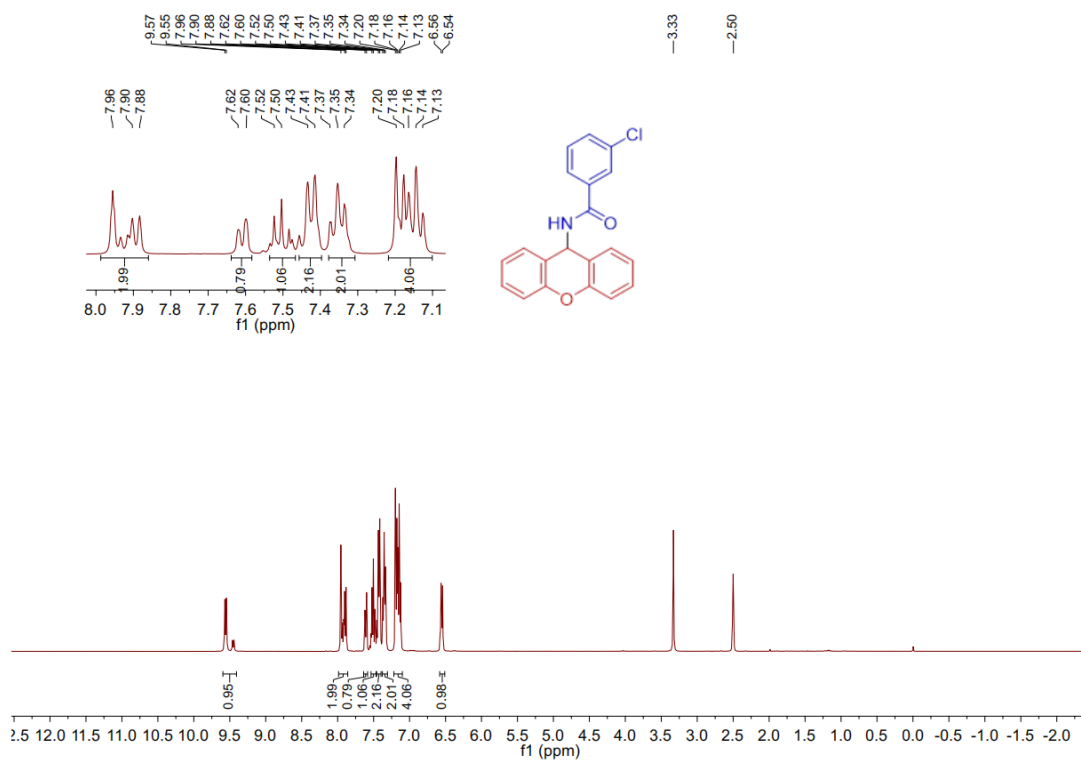

### 3ap <sup>13</sup>C NMR

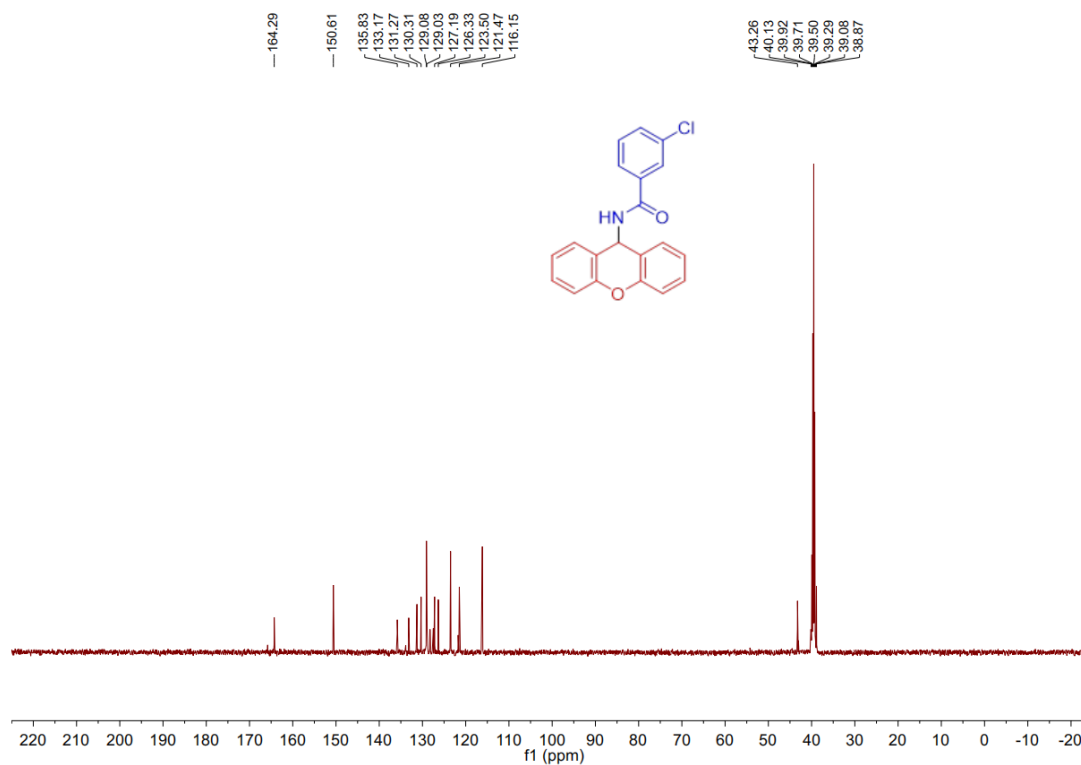

### 3aq <sup>1</sup>H NMR

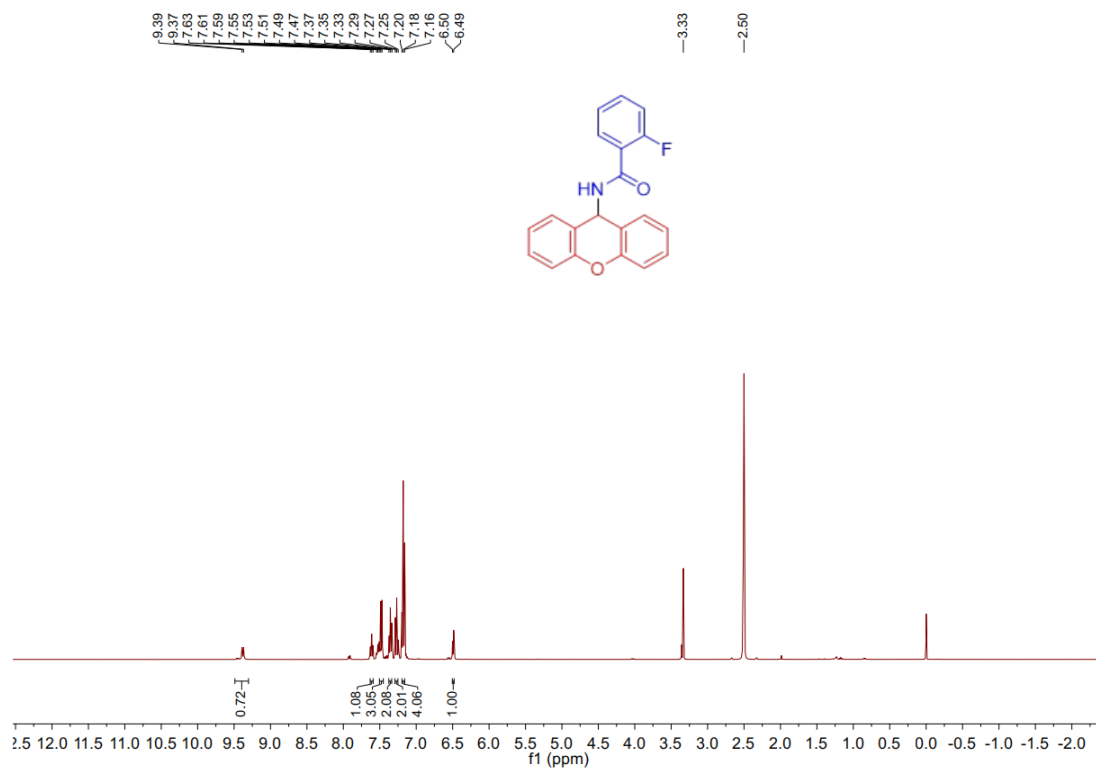

### 3aq <sup>13</sup>C NMR

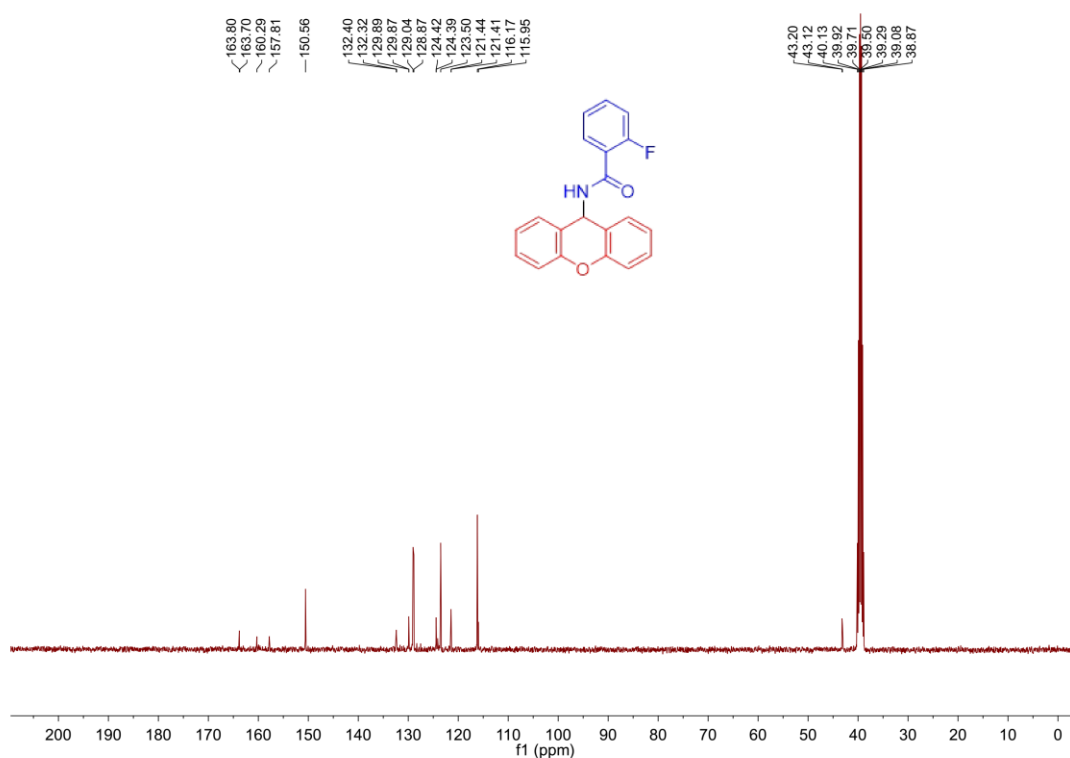

### 3ar <sup>1</sup>H NMR

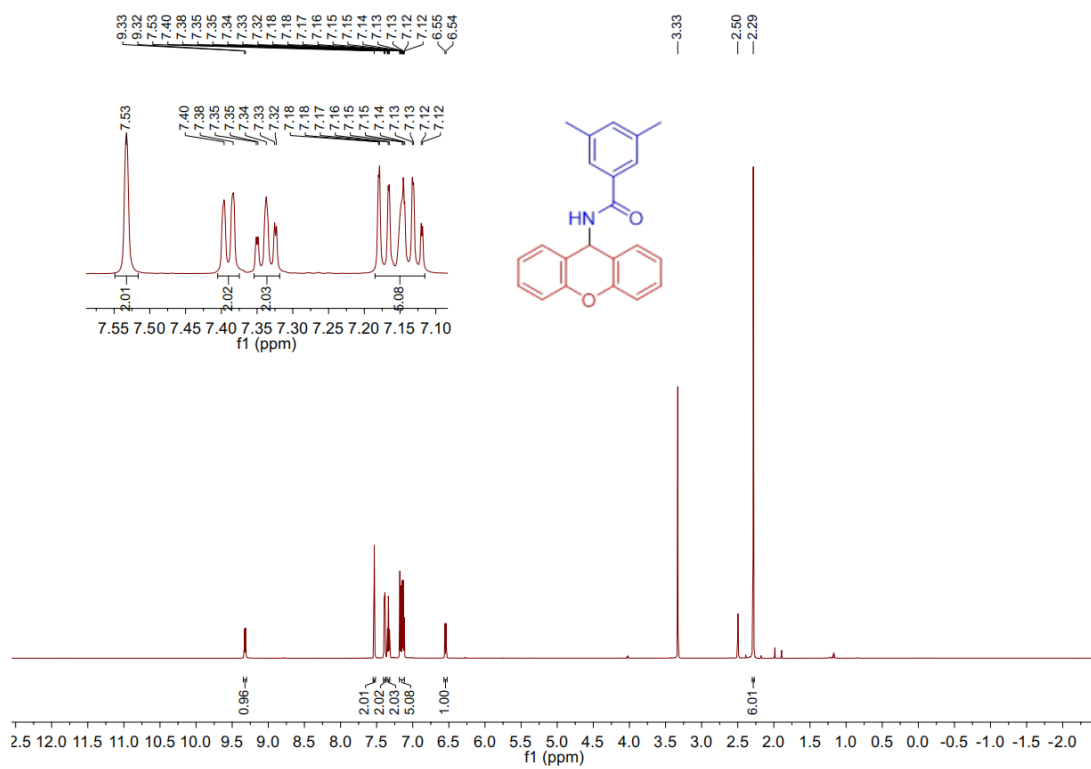

### 3ar <sup>13</sup>C NMR

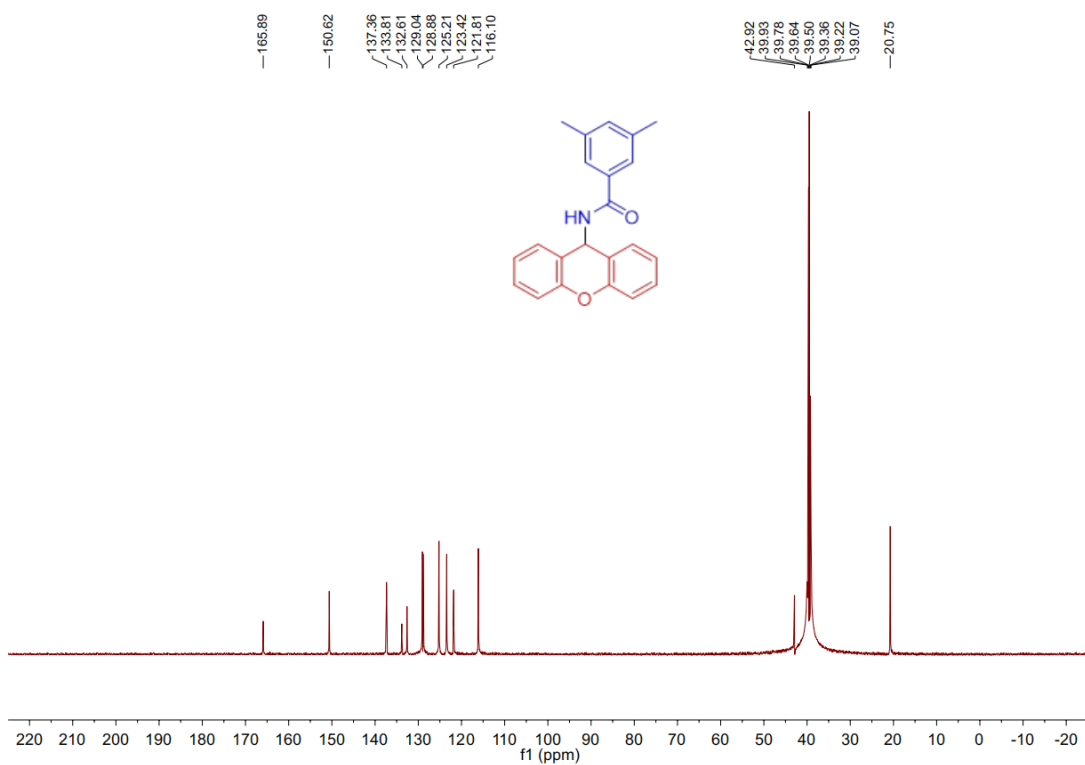

### 3as <sup>1</sup>H NMR

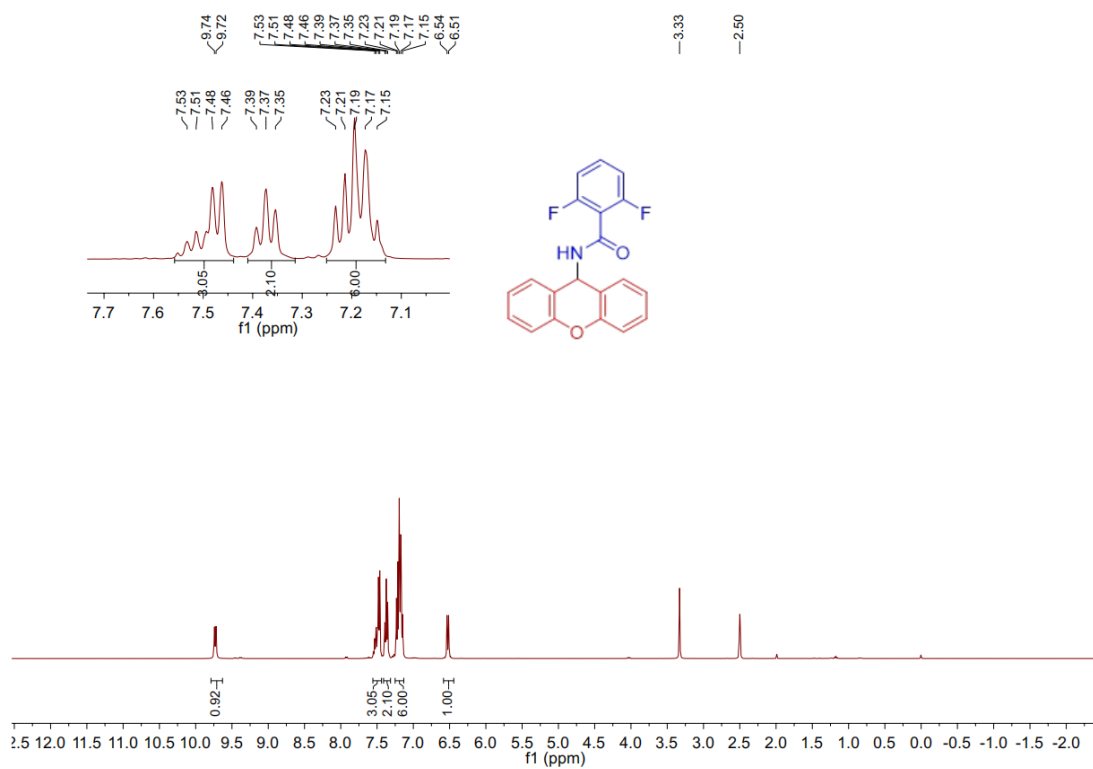

### 3as <sup>13</sup>C NMR

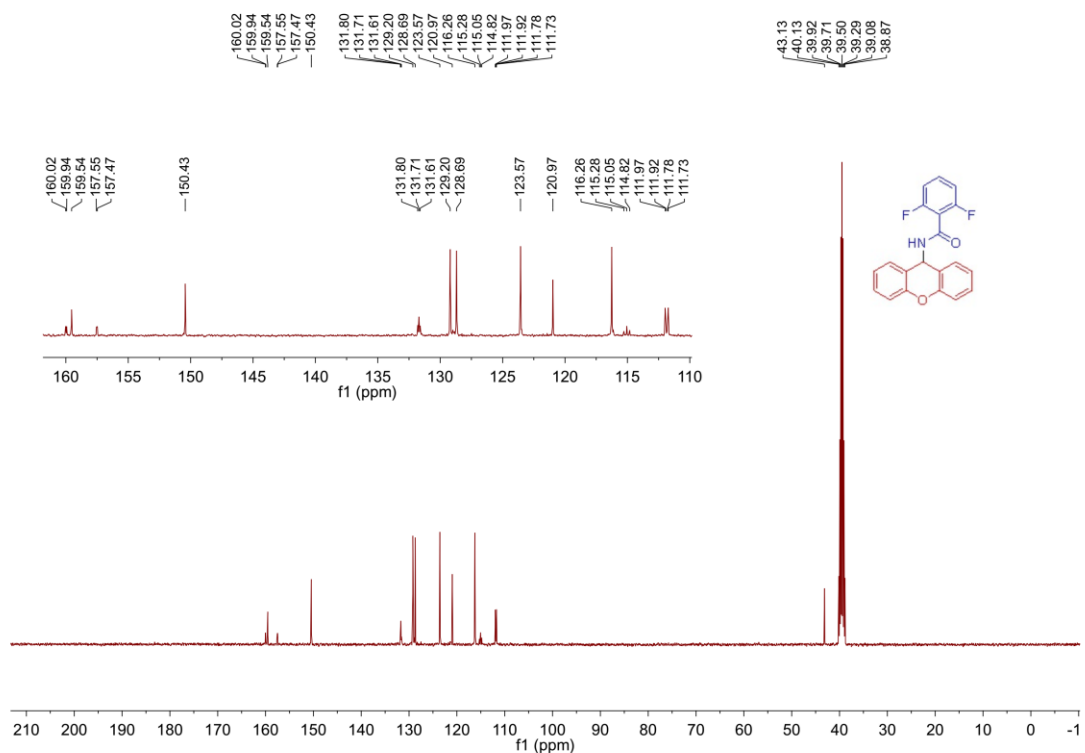

### 3at <sup>1</sup>H NMR

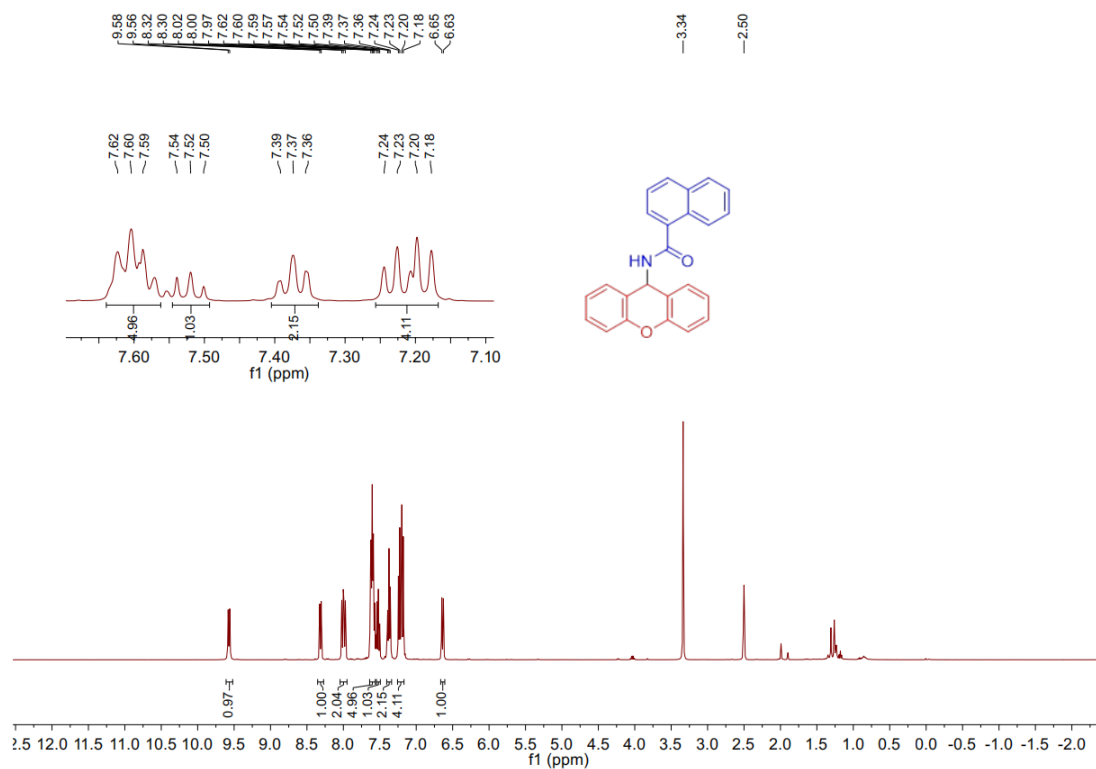

### 3at <sup>13</sup>C NMR

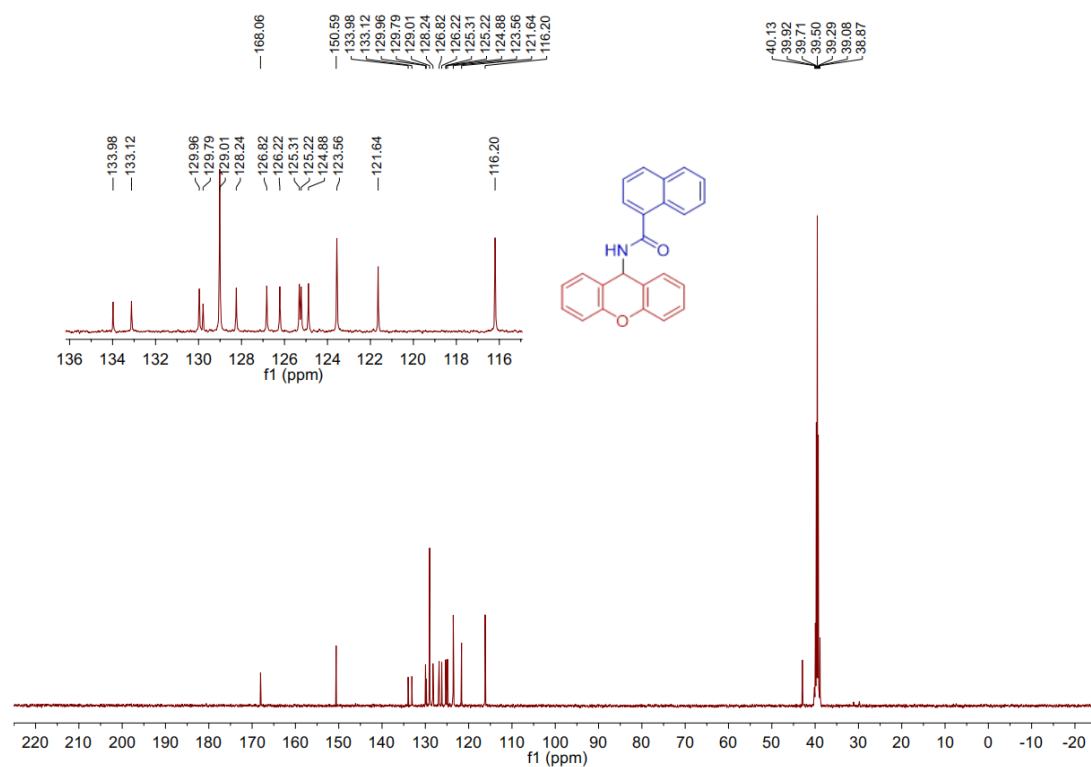

### 3au <sup>1</sup>H NMR

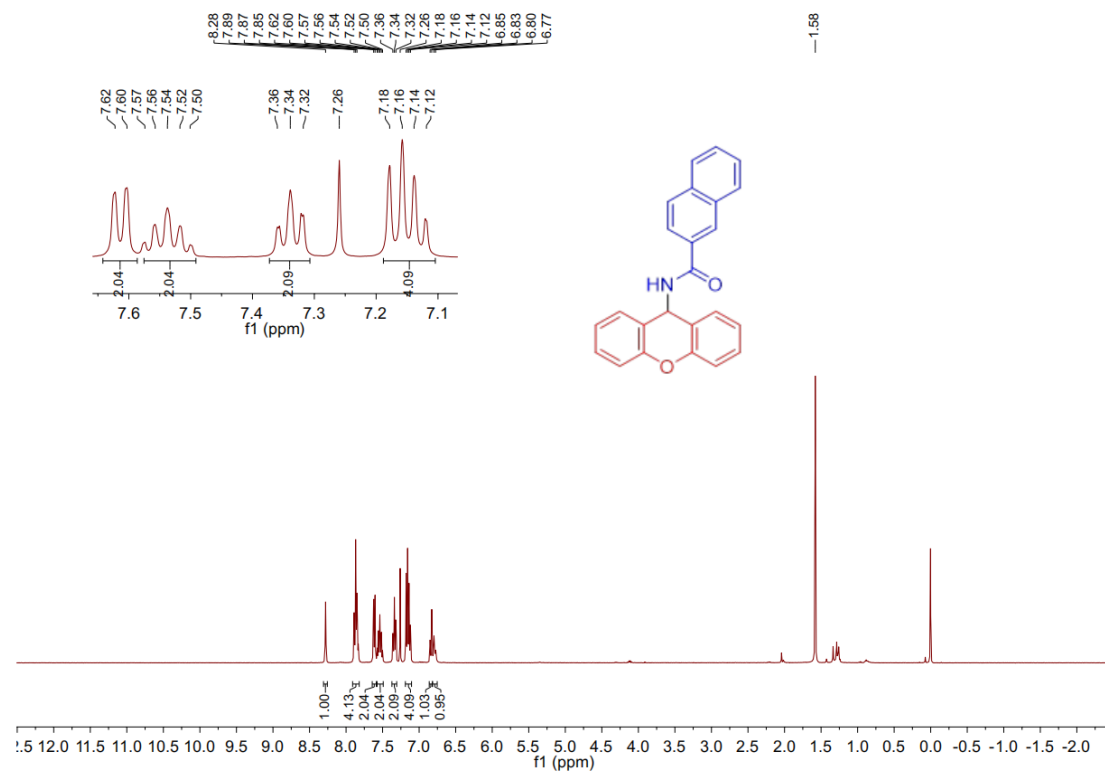

### 3au <sup>13</sup>C NMR

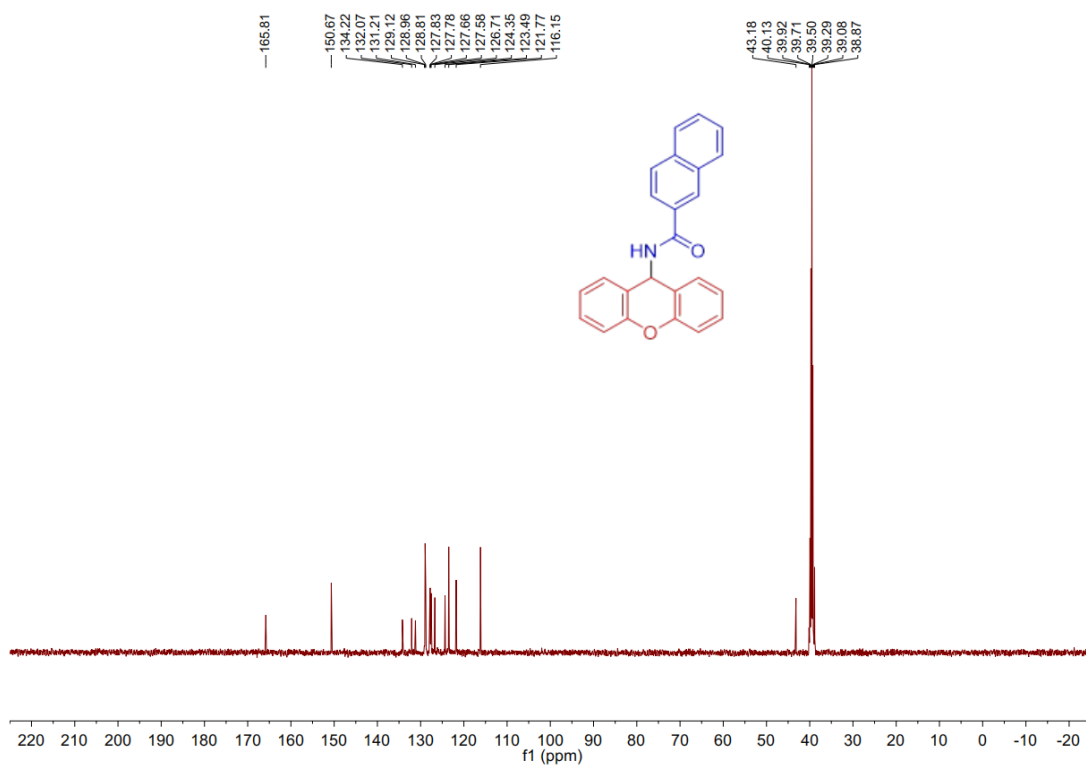

3av <sup>1</sup>H NMR

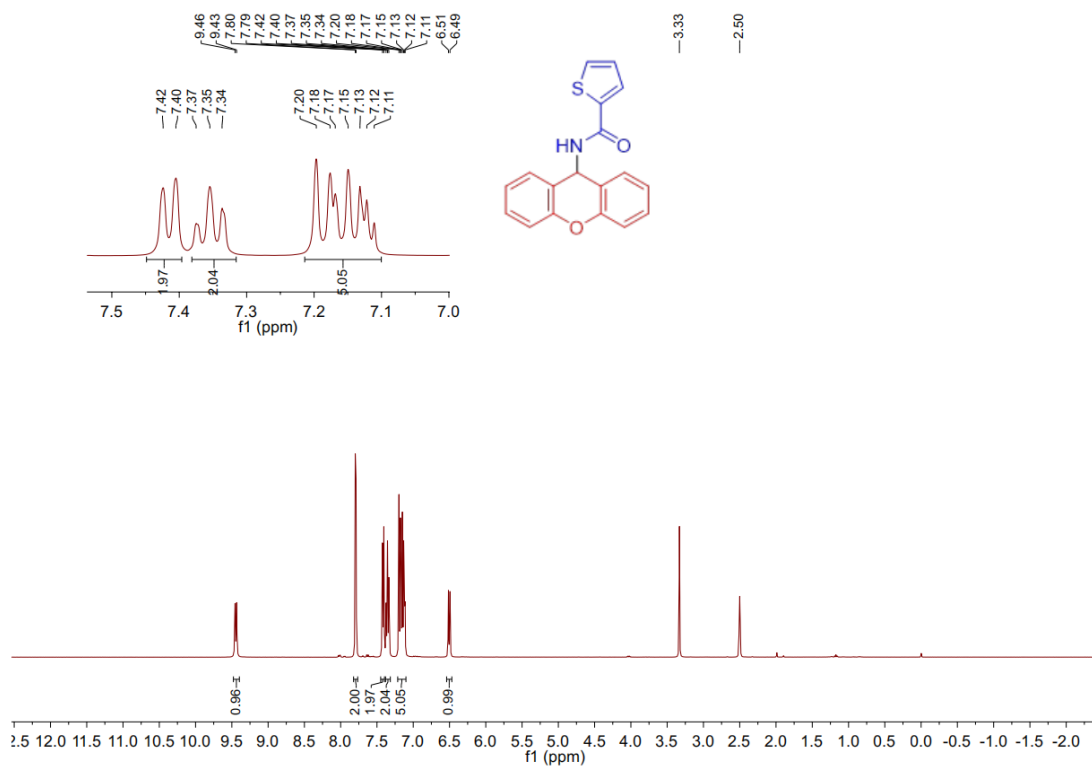

3av <sup>13</sup>C NMR

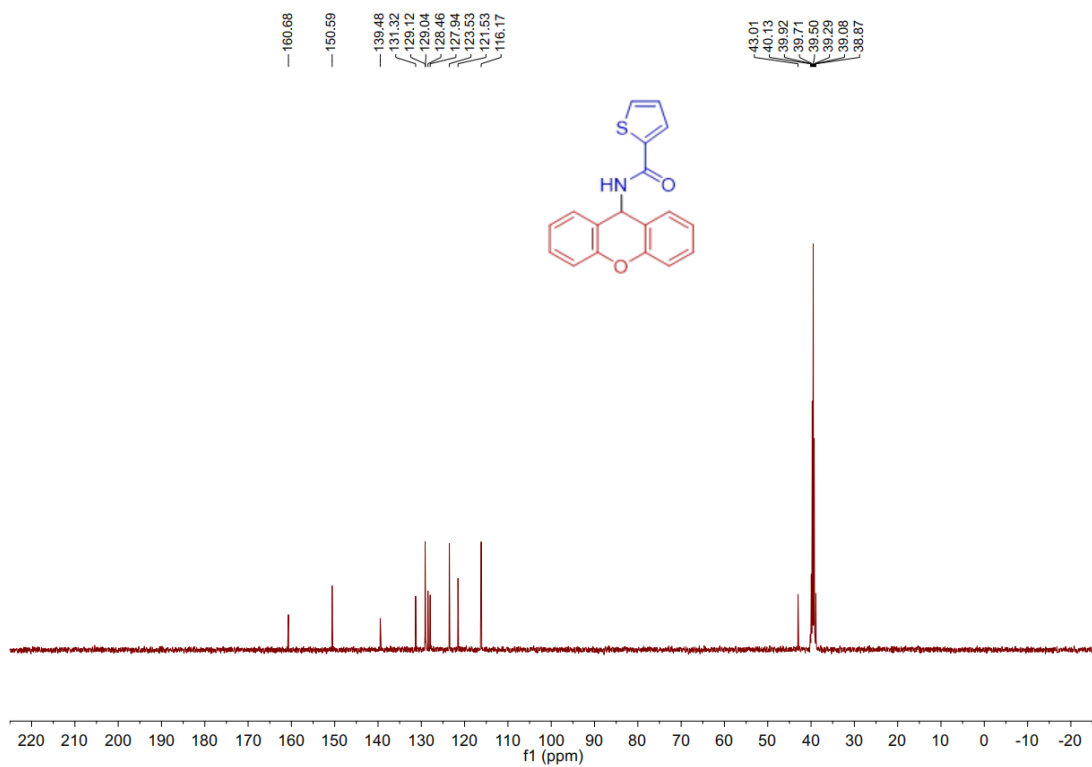



3aw <sup>1</sup>H NMR

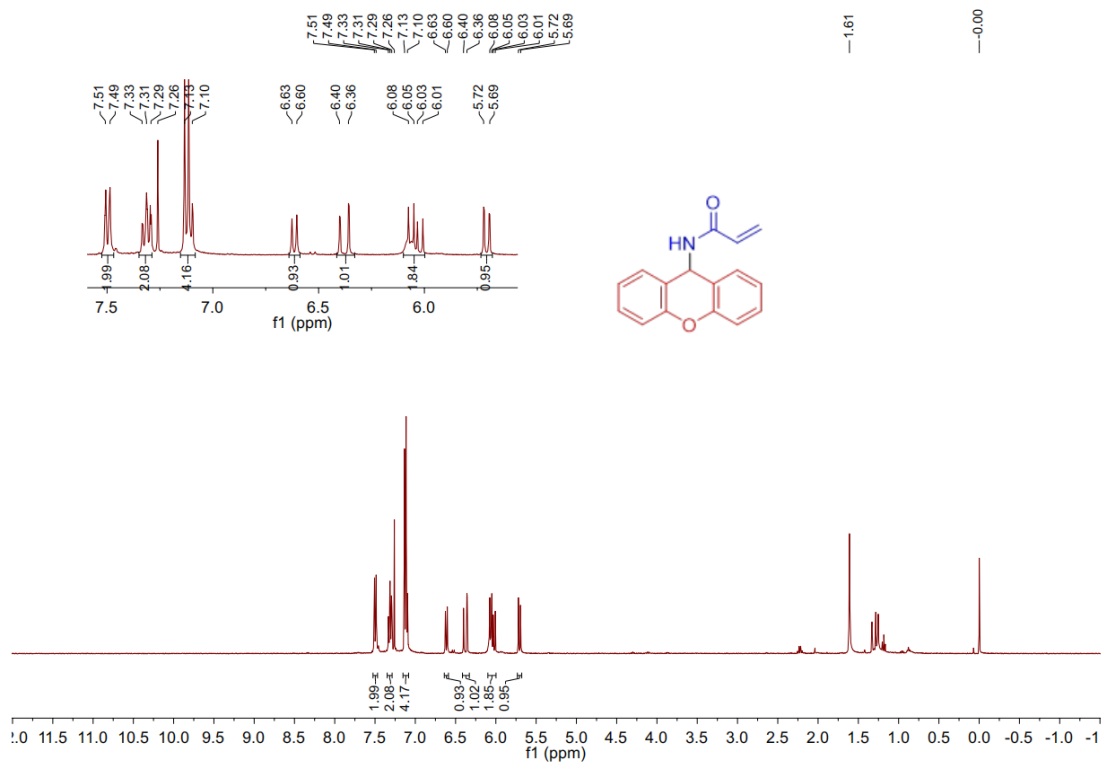

3aw <sup>13</sup>C NMR

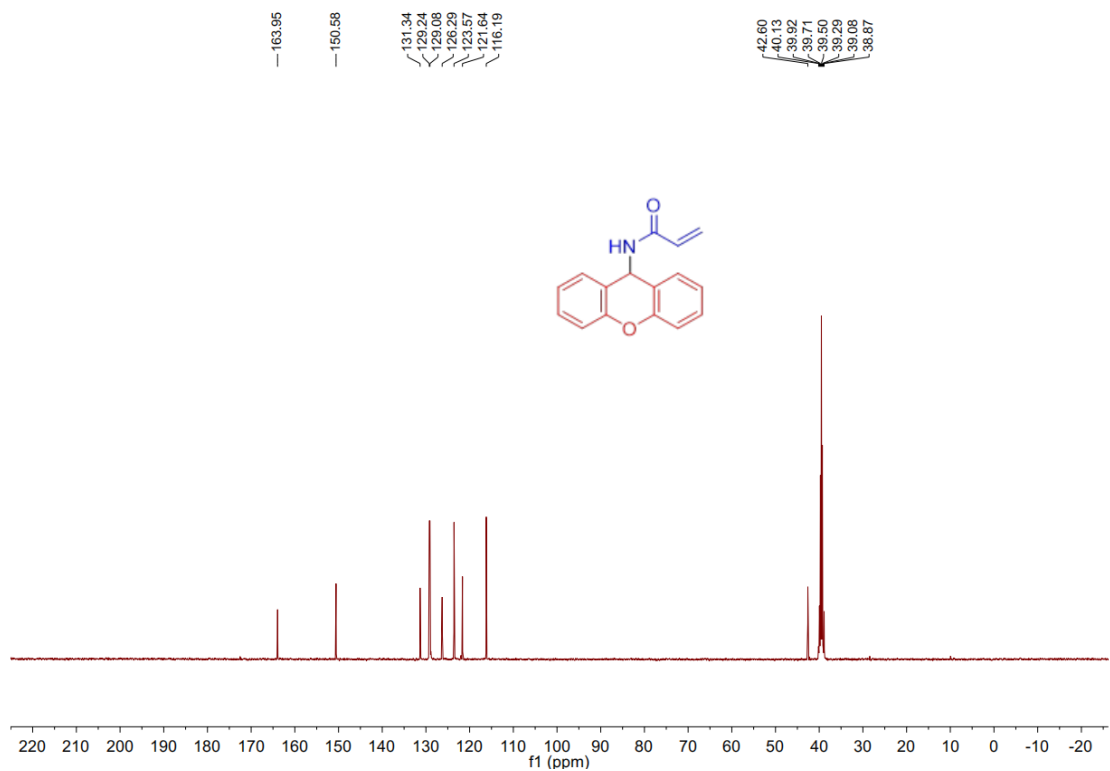

### 3ax <sup>1</sup>H NMR

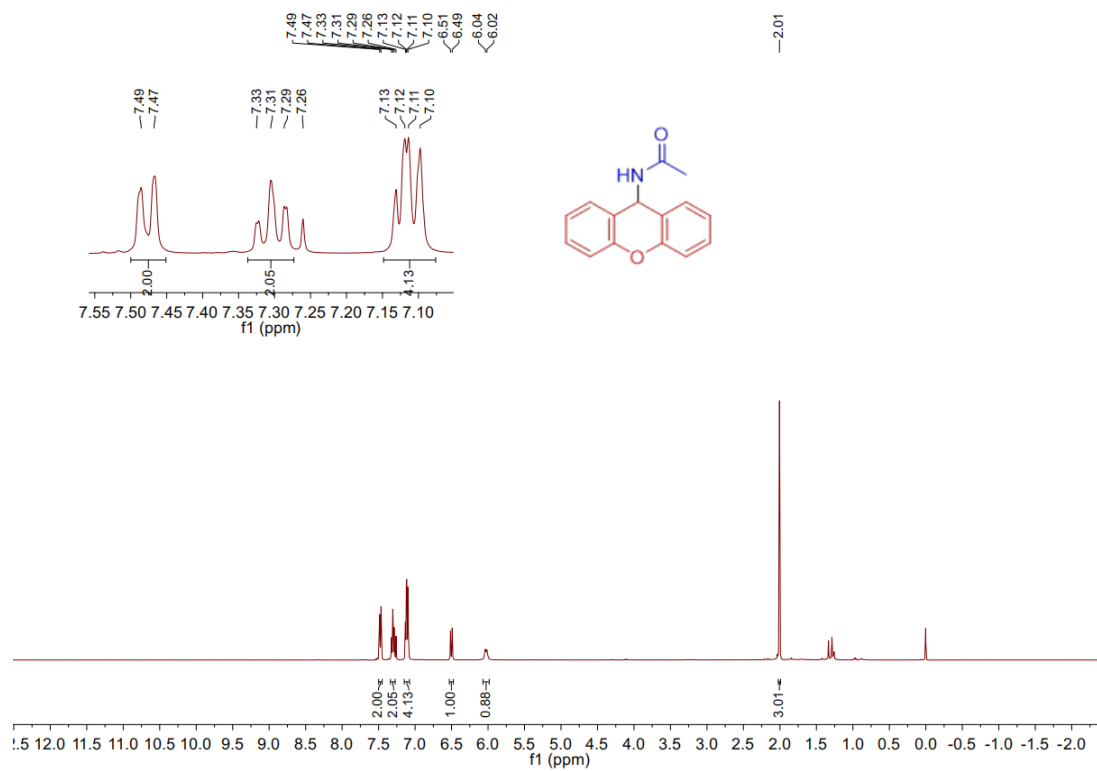

### 3ax <sup>13</sup>C NMR

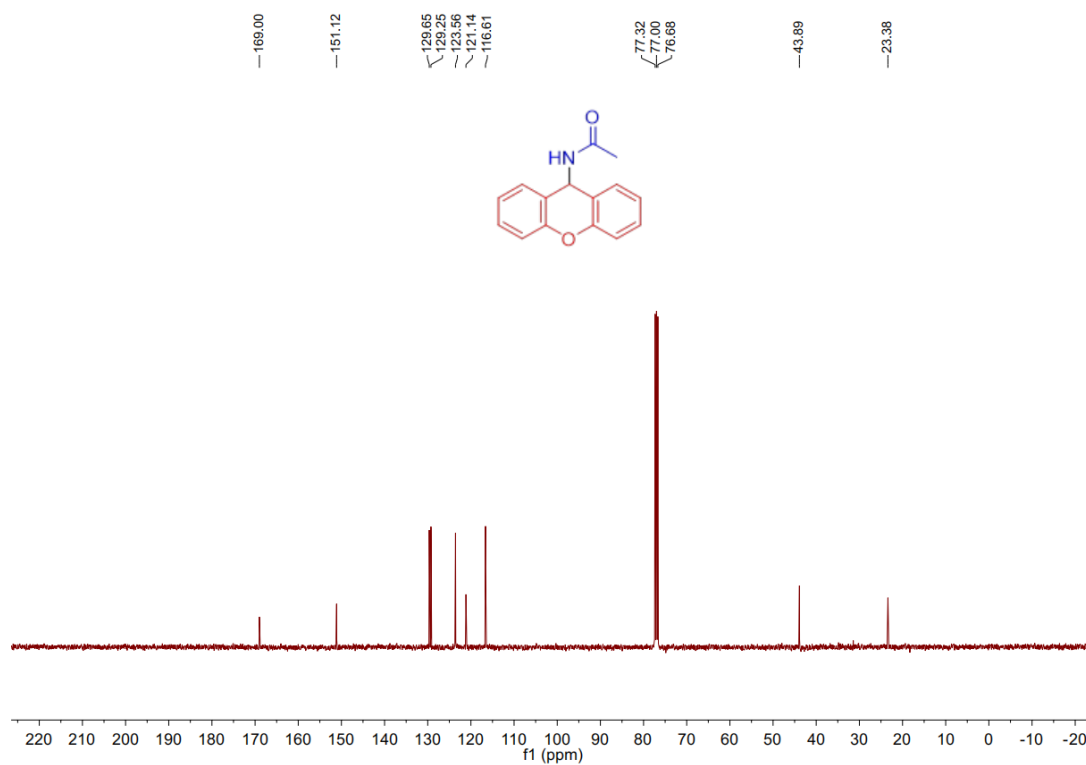

### 3ay <sup>1</sup>H NMR

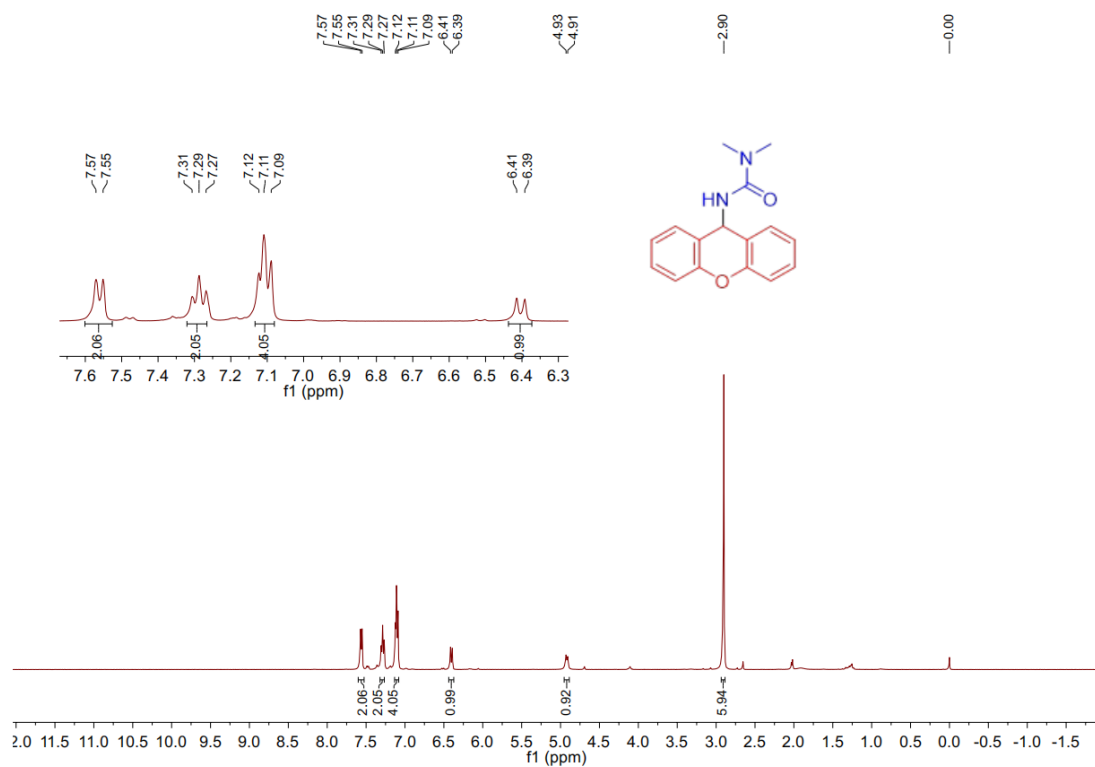

### 3ay <sup>13</sup>C NMR

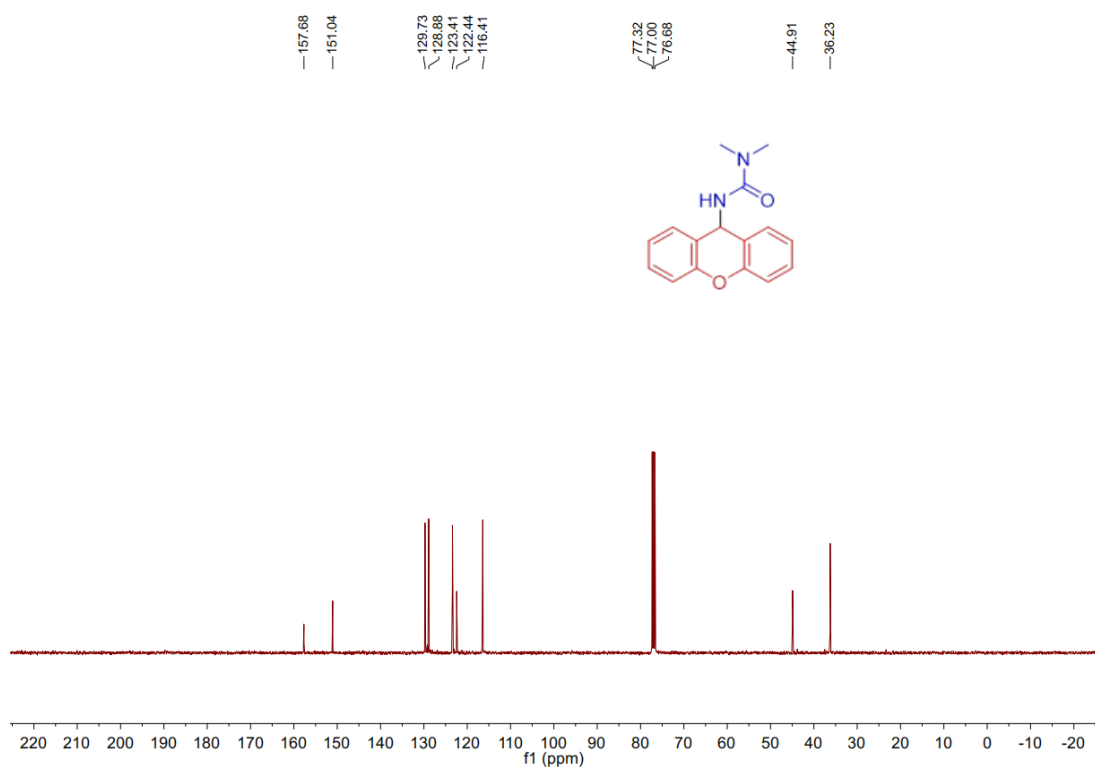

### 3az <sup>1</sup>H NMR

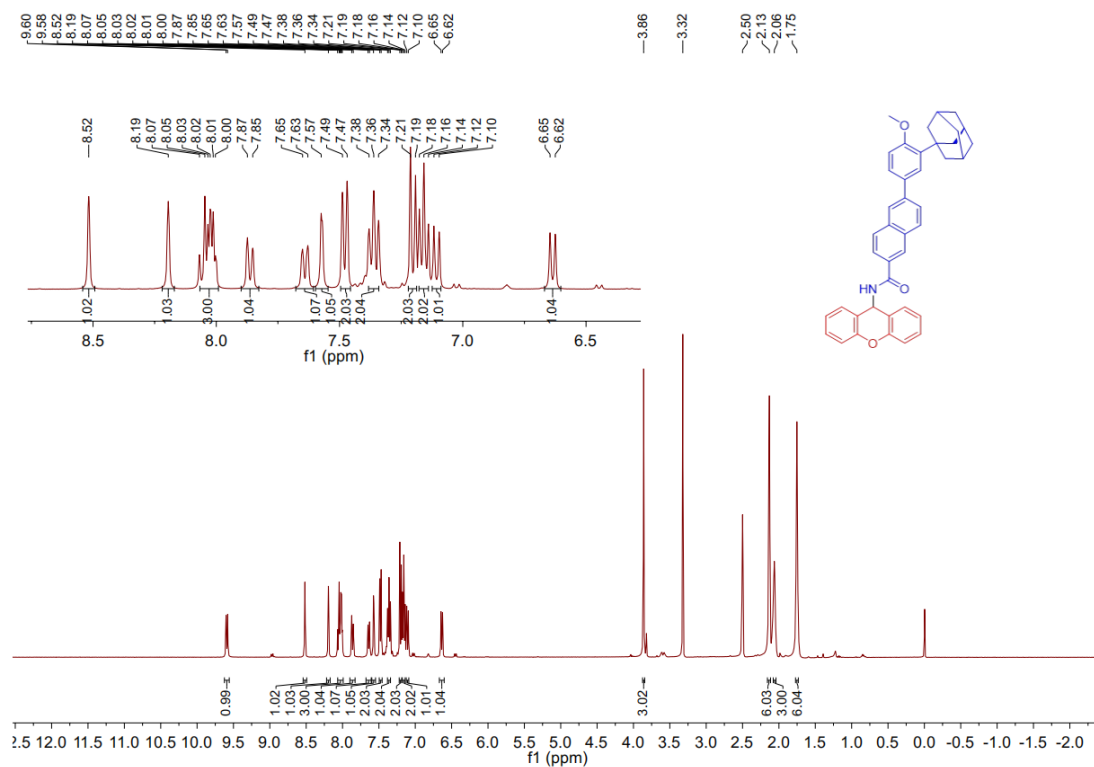

### 3az <sup>13</sup>C NMR

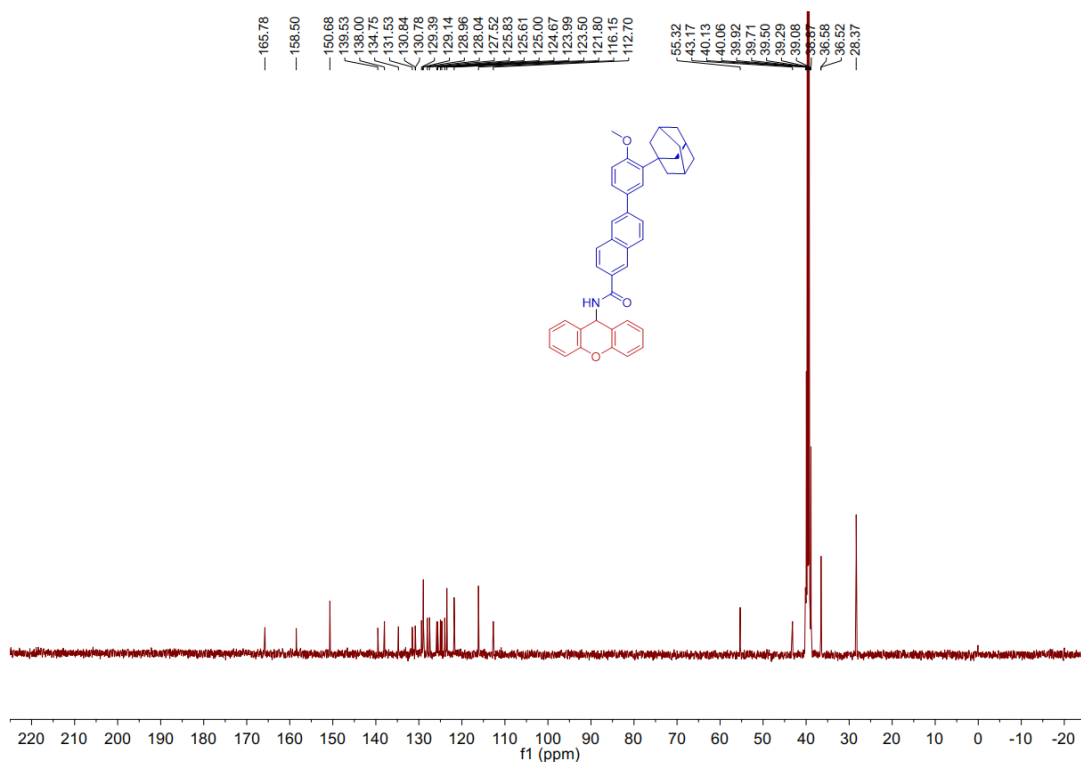

### 3ba <sup>1</sup>H NMR

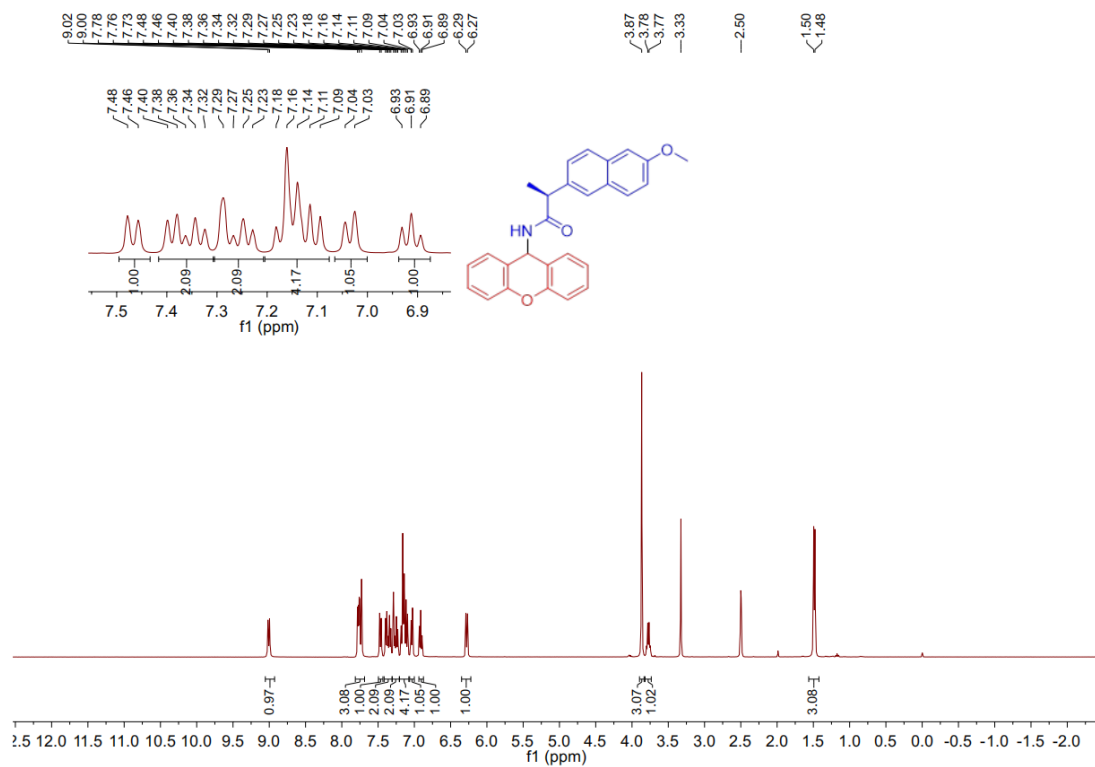

### 3ba <sup>13</sup>C NMR

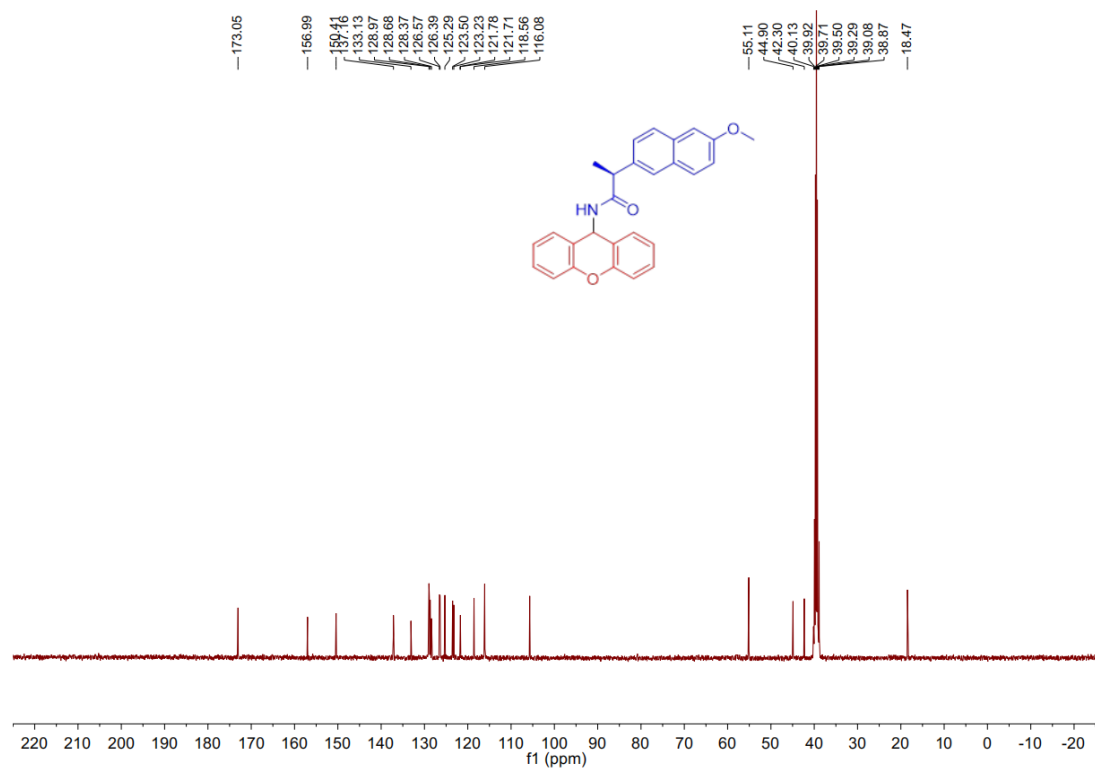

**3bb** <sup>1</sup>H NMR

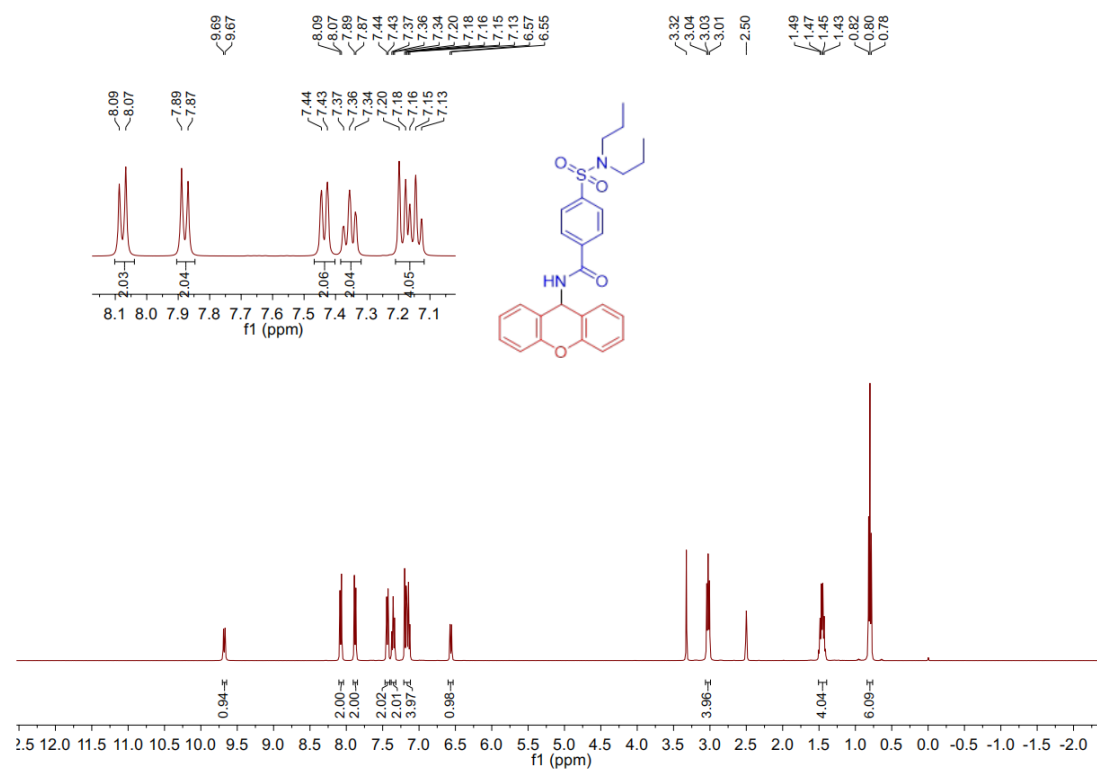

**3bb** <sup>13</sup>C NMR

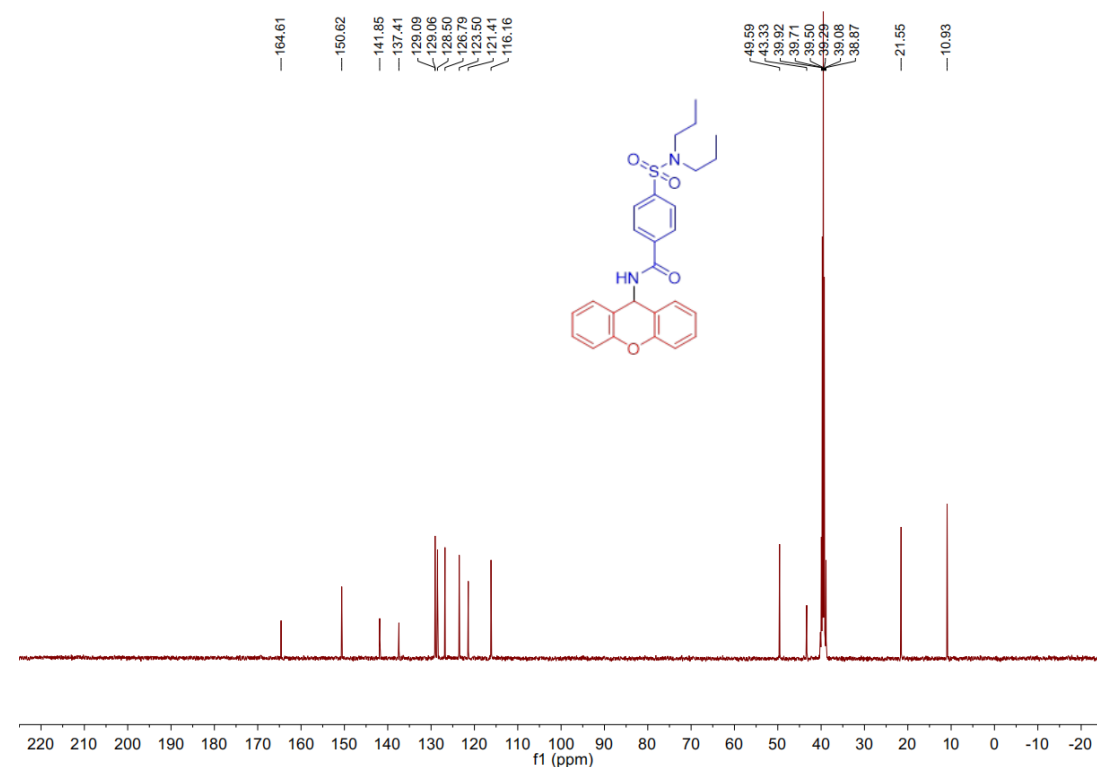

### 3bc <sup>1</sup>H NMR

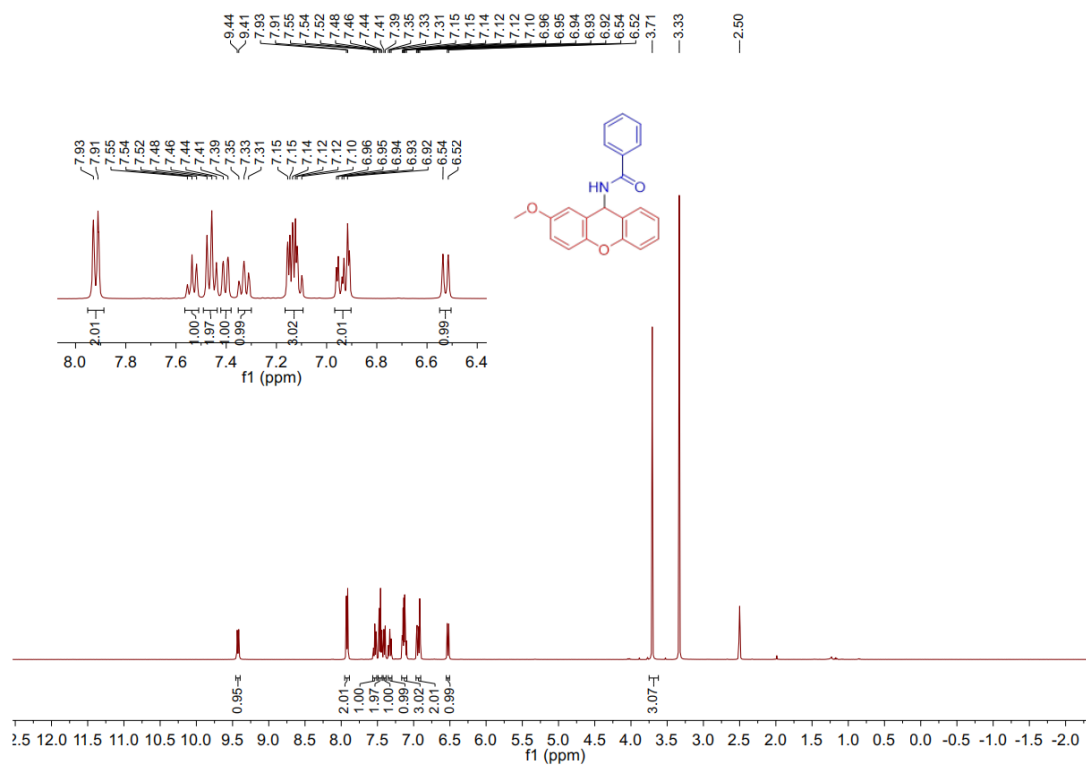

### 3bc <sup>13</sup>C NMR

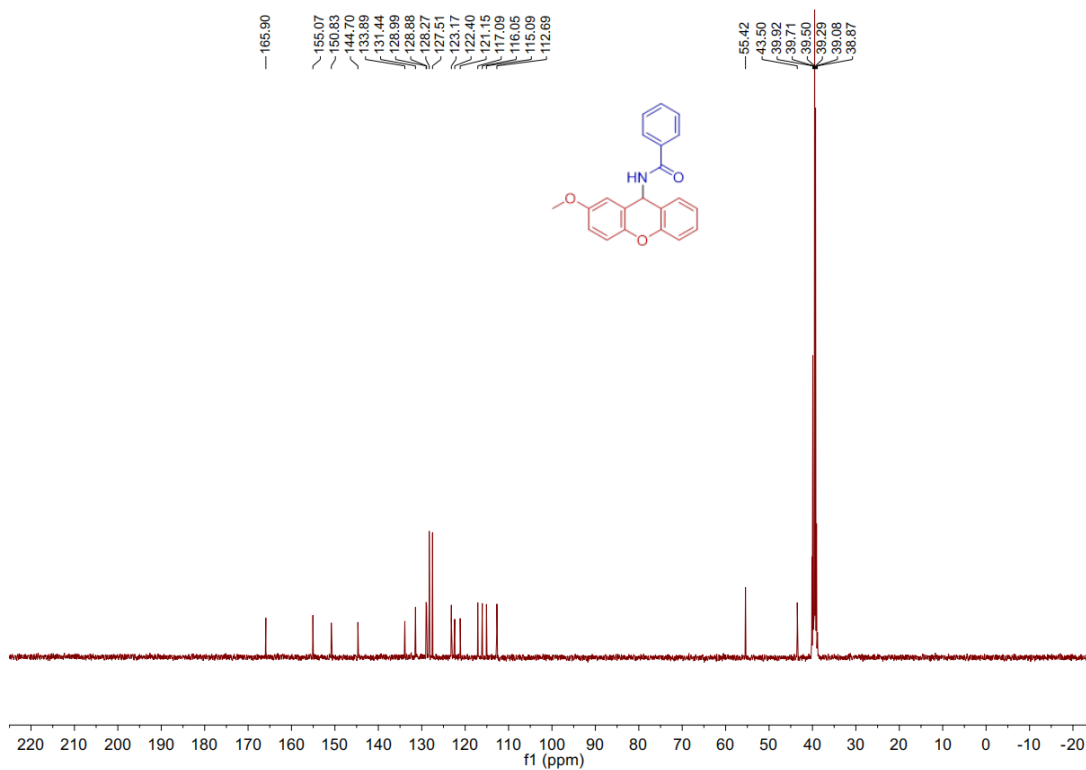

**3bd <sup>1</sup>H NMR**

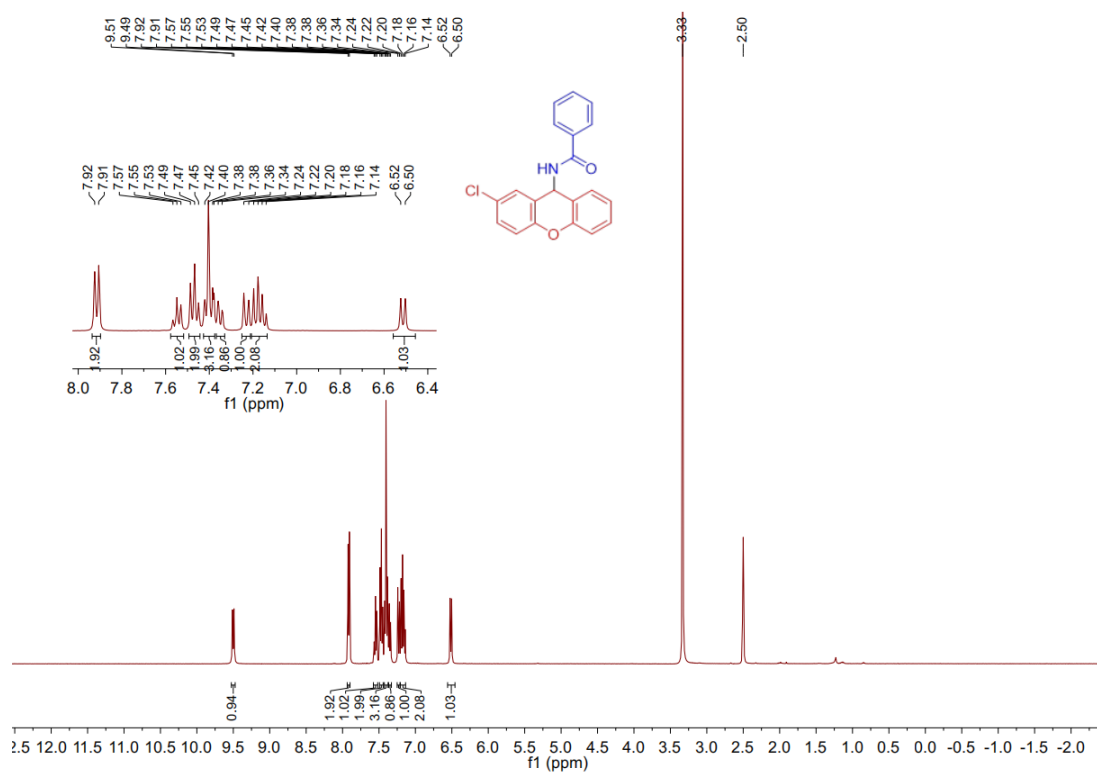

**3bd <sup>13</sup>C NMR**

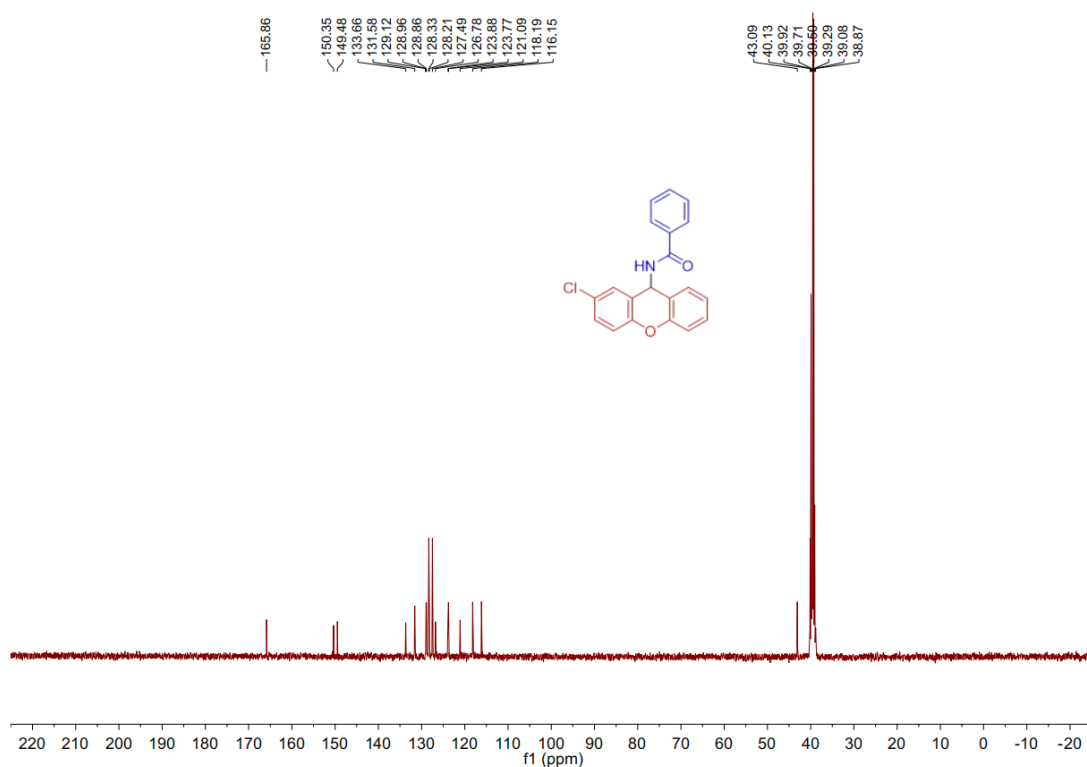



### 3be <sup>1</sup>H NMR

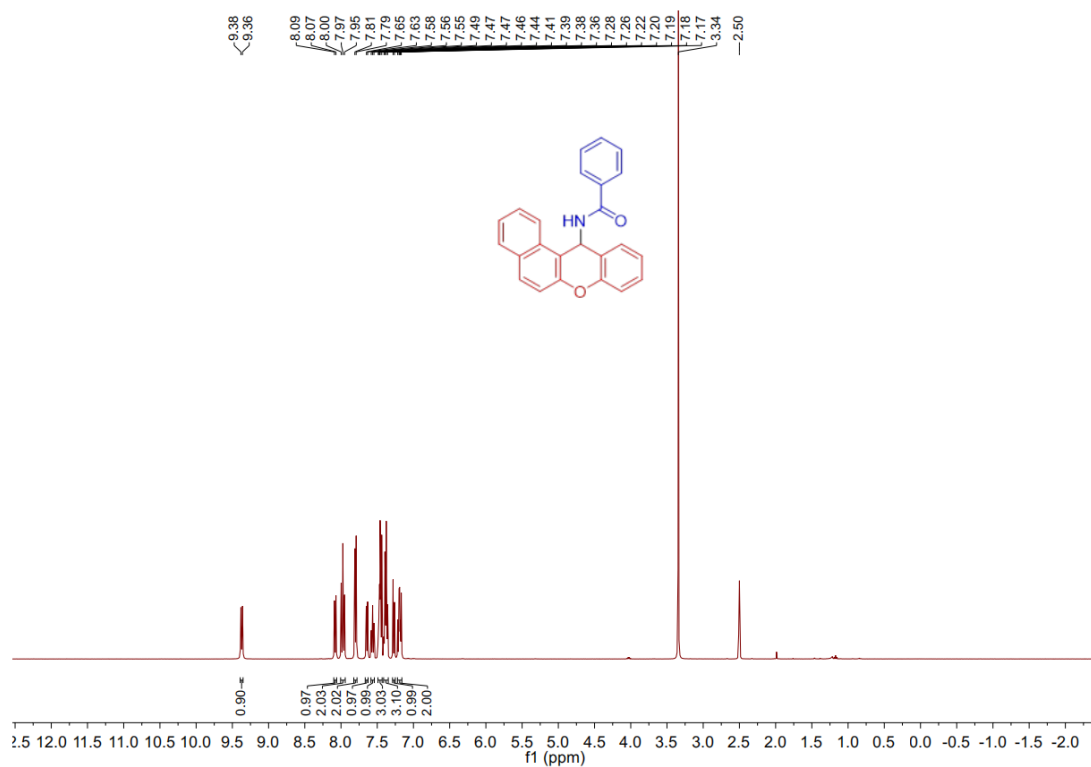

### 3be <sup>13</sup>C NMR

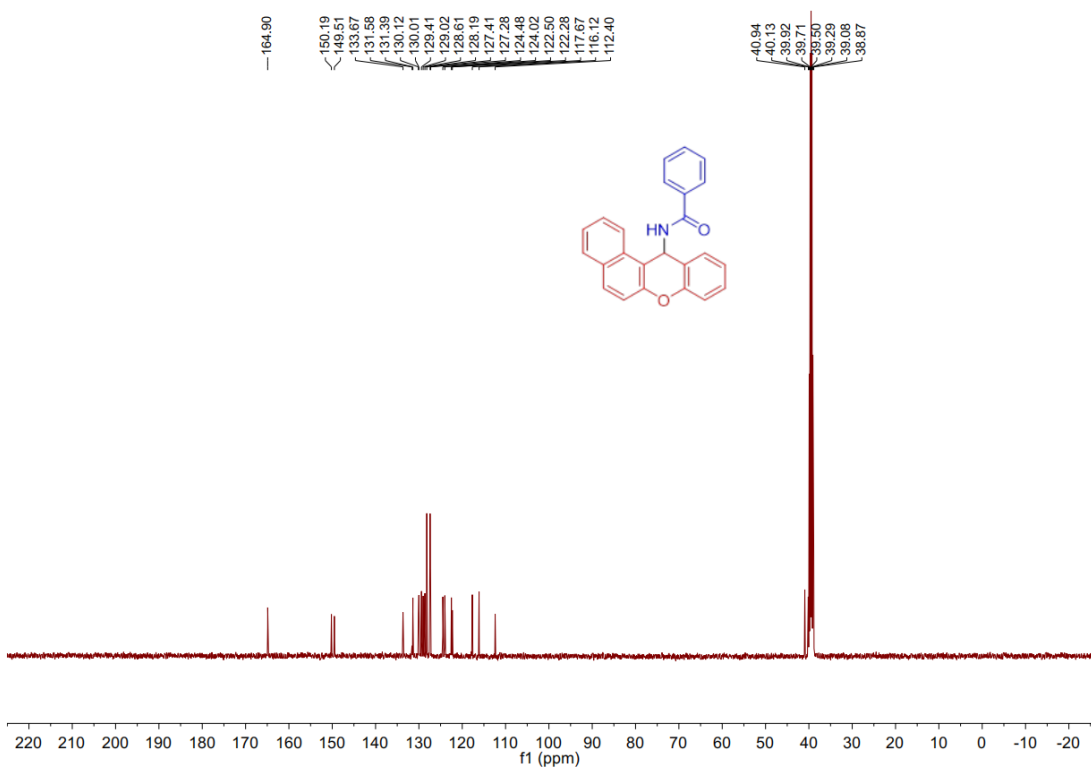

### 3bf <sup>1</sup>H NMR

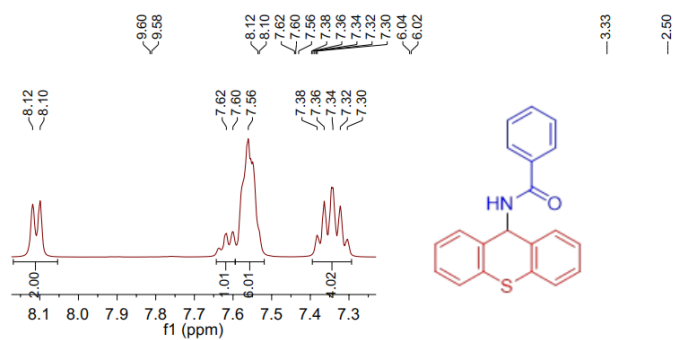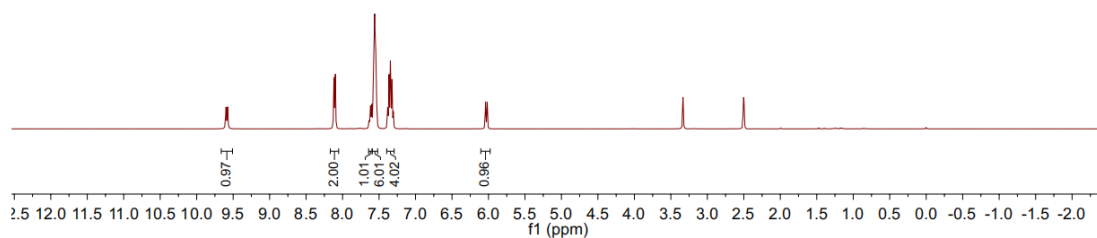

### 3bf <sup>13</sup>C NMR

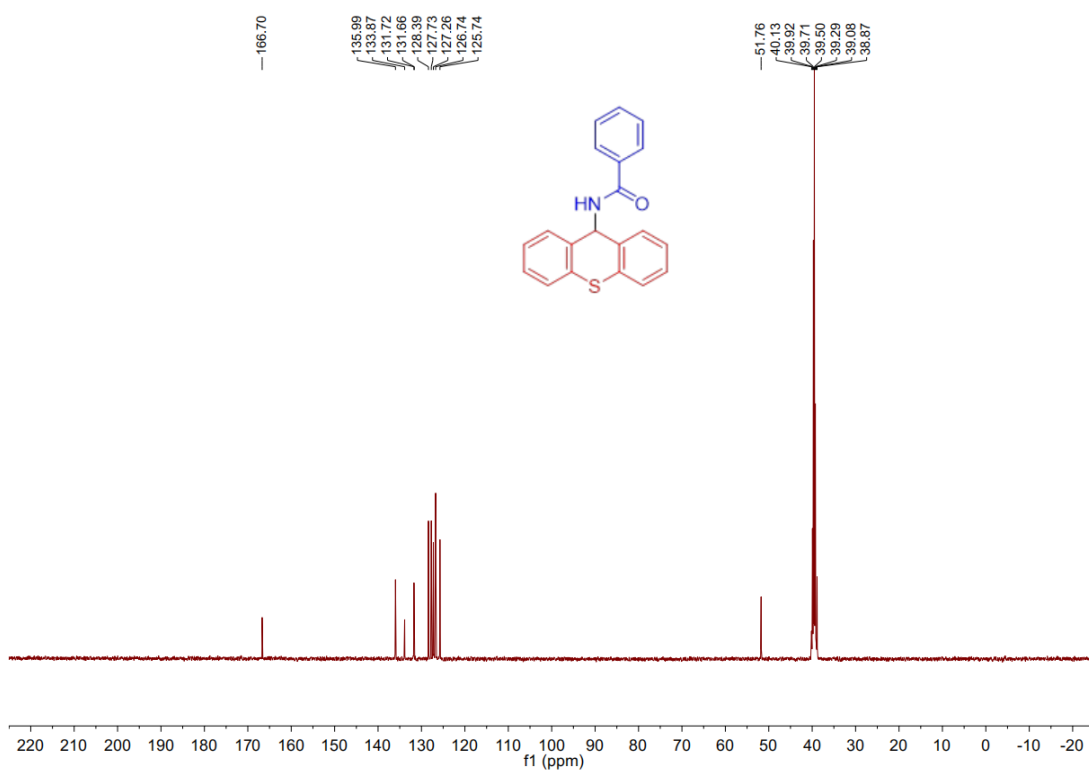

### 3bg <sup>1</sup>H NMR

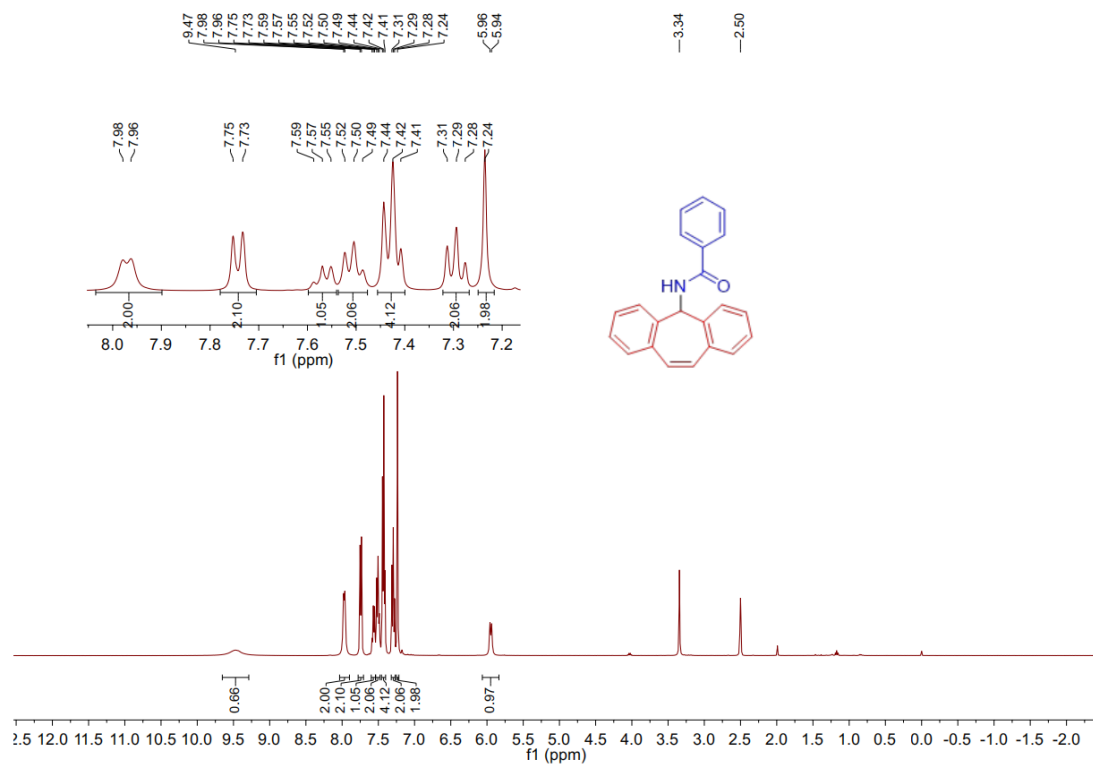

### 3bg <sup>13</sup>C NMR

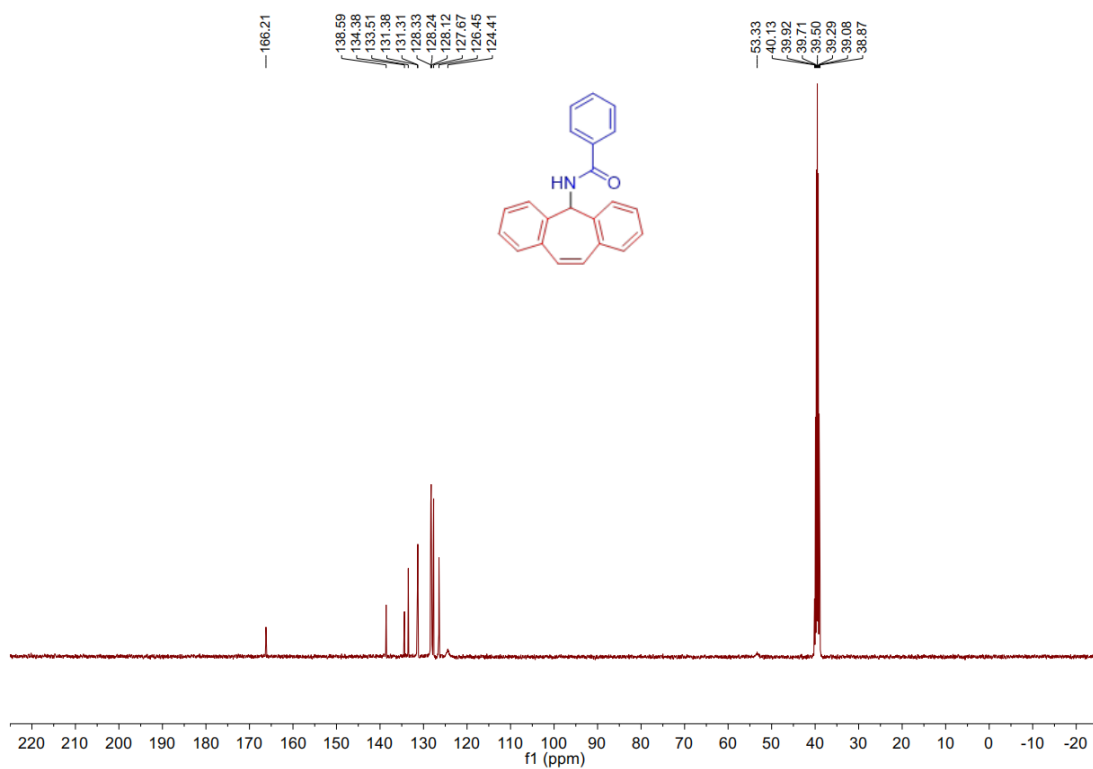

### 3bh <sup>1</sup>H NMR

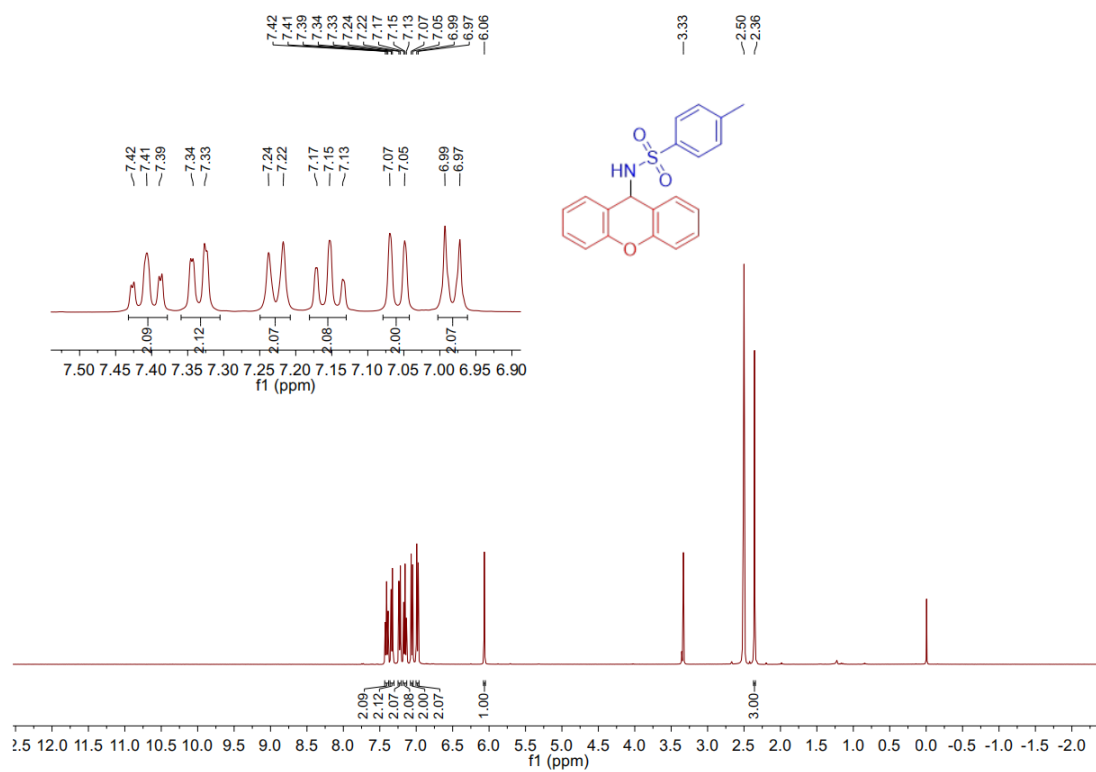

### 3bh <sup>13</sup>C NMR

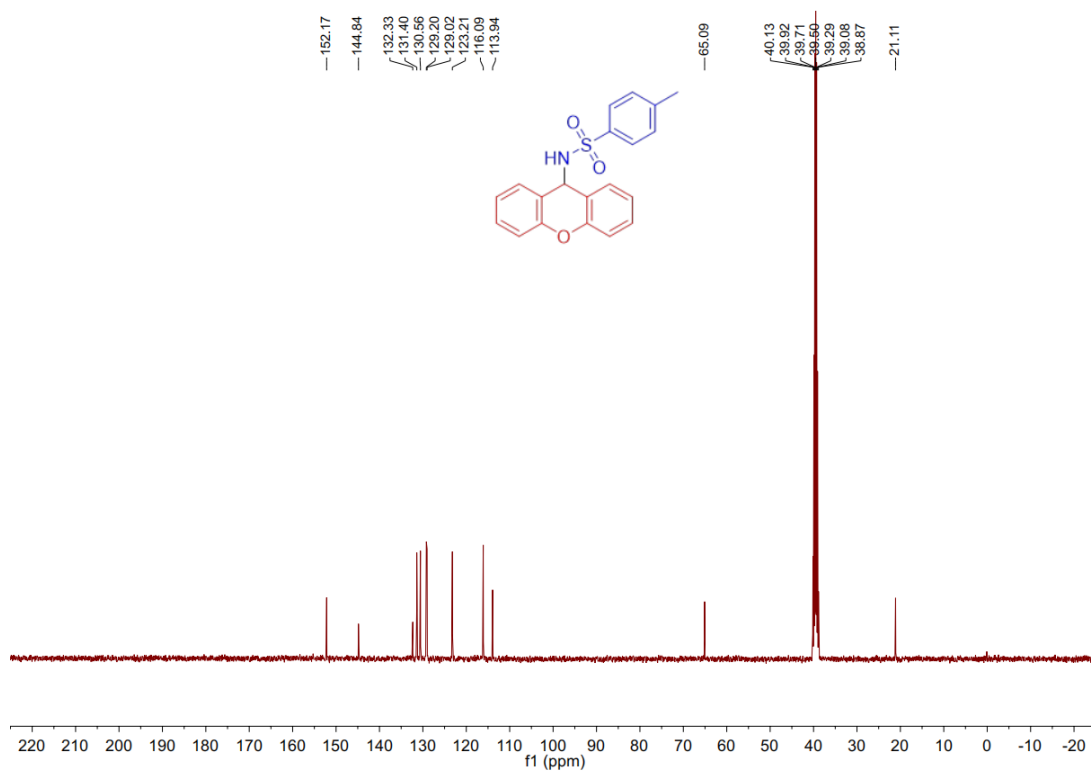

### 3bi <sup>1</sup>H NMR

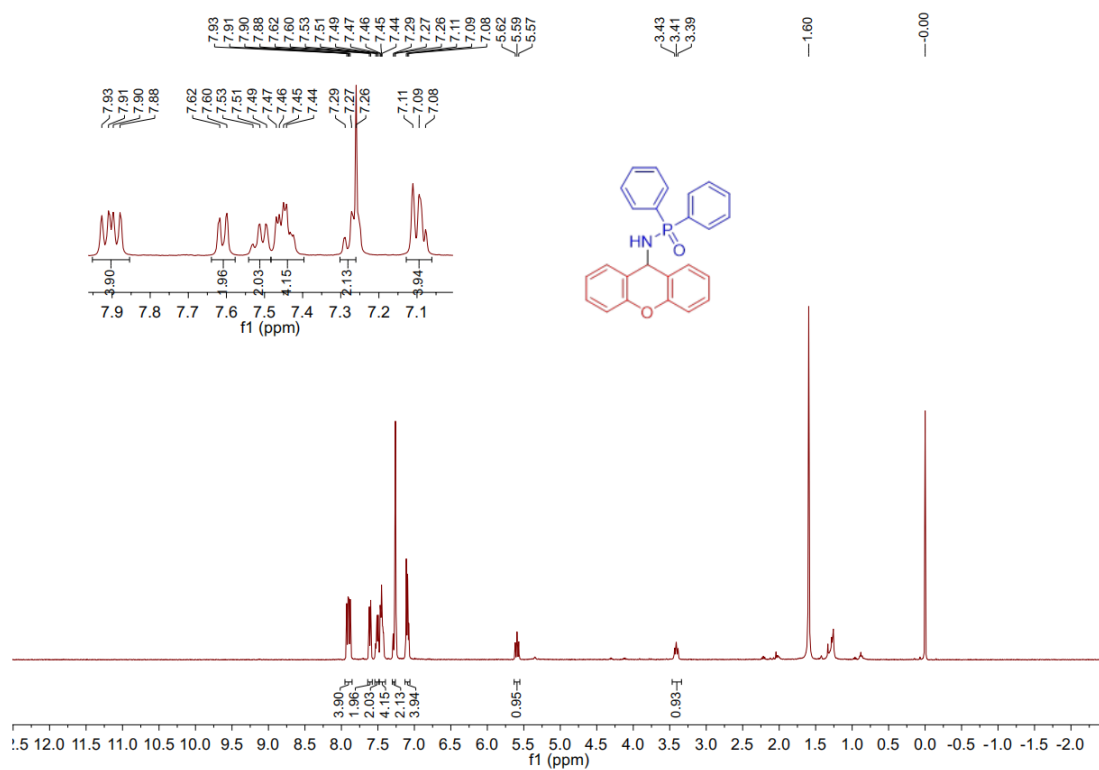

### 3bi <sup>13</sup>C NMR

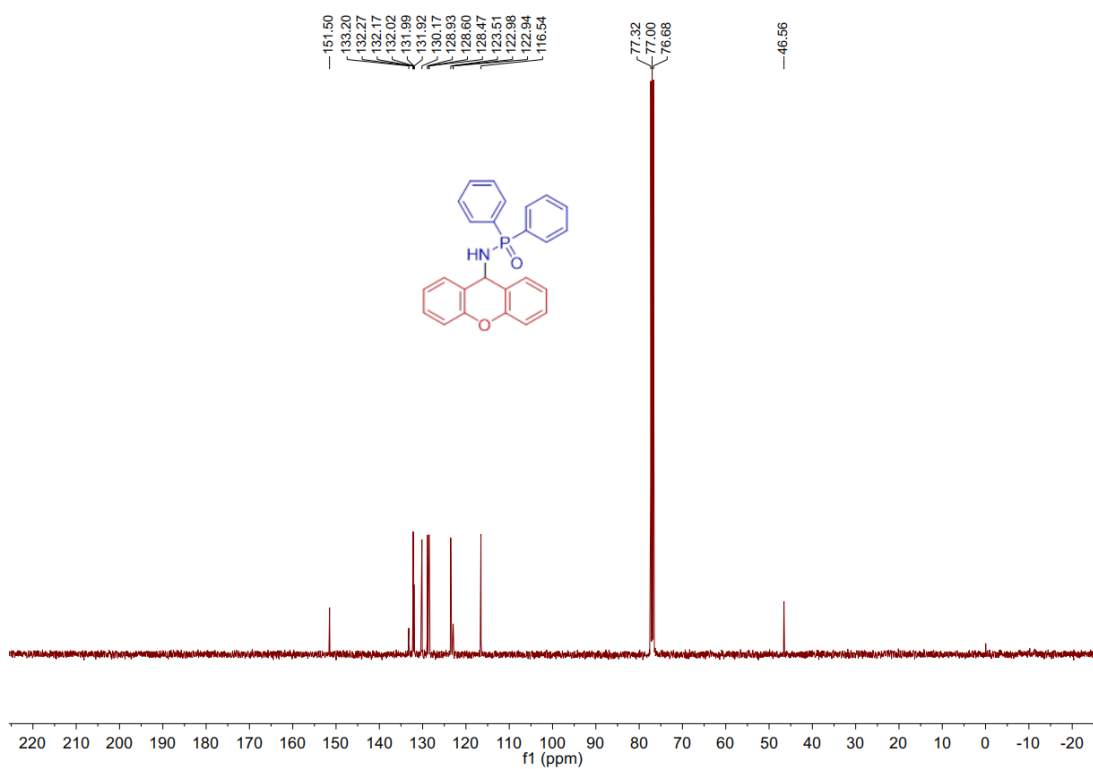

### 4aa <sup>1</sup>H NMR

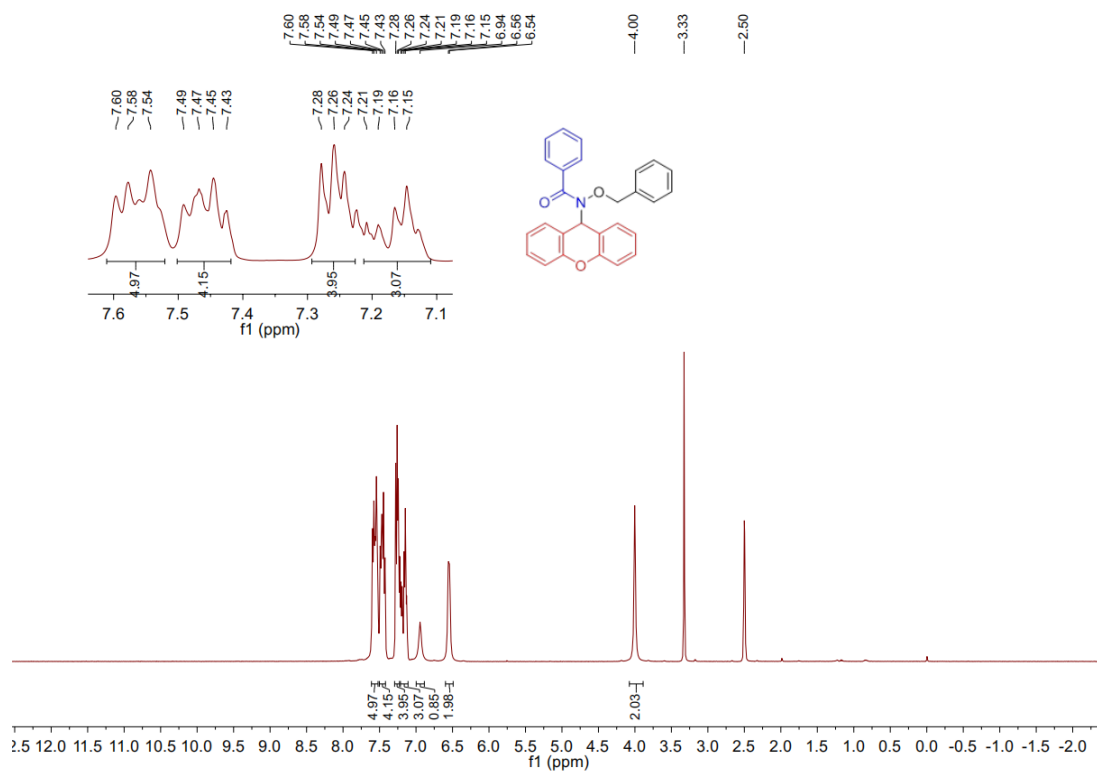

### 4aa <sup>13</sup>C NMR

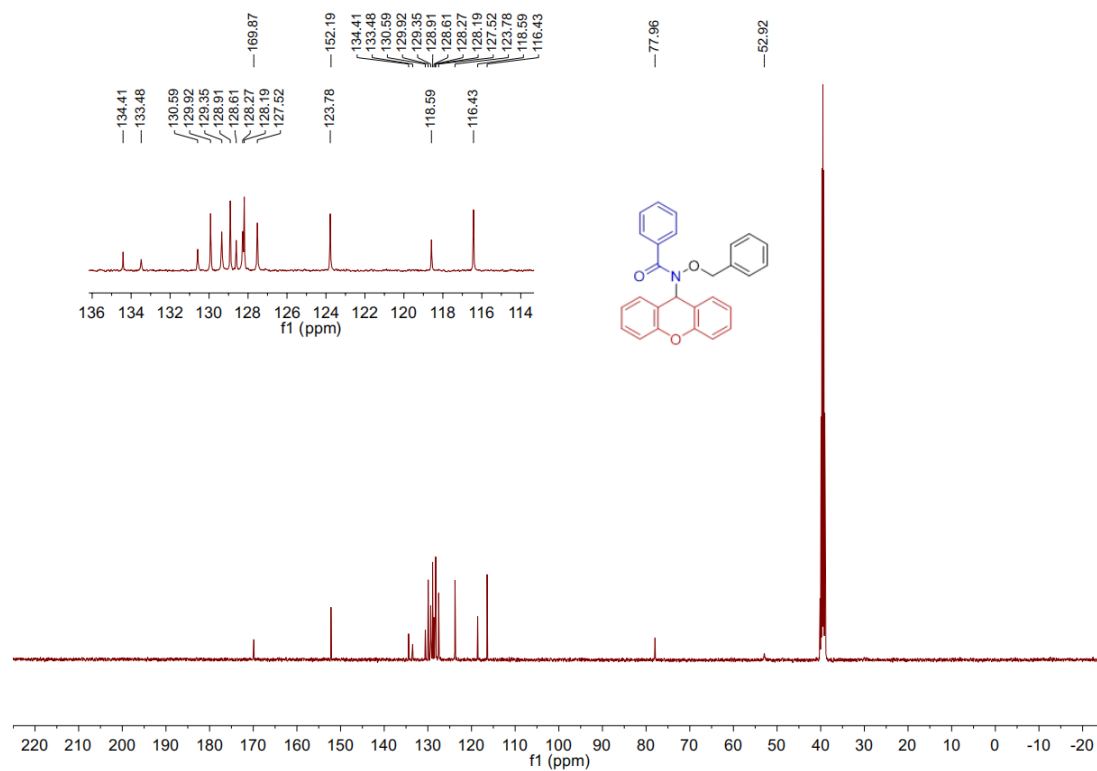

Supplement: d2qo01108e1.pdf [file d2qo01108e1.pdf]
